# Supplementary material for: Regioselective C–H chalcogenylation and halogenation of arenes and alkenes under metal-free conditions
Source: Royal Society of Chemistry journal article supplement (doi:10.1039/d3ob00150d), 2023-01-01
Supplement: d3ob00150d1.pdf [file d3ob00150d1.pdf]

## Regioselective C-H chalcogenylation and halogenation of arenes and alkenes under metal-free conditions

Bin Li<sup>a §</sup>, Mingli Hu<sup>a §</sup>, Jun Ge<sup>a</sup>, Wei Xu<sup>a</sup>, Jinghan Wu<sup>a</sup>, YaoTong<sup>a</sup>, Zhenyi Zhao<sup>a</sup>,  
Xiuxiu liu<sup>a\*</sup>, Ling He<sup>a\*</sup>

*Key Laboratory of Drug-Targeting and Drug Delivery System of the Education Ministry, Sichuan Engineering Laboratory for Plant-Sourced Drug and Sichuan Research Center for Drug Precision Industrial Technology, Department of Medicinal Chemistry, West China School of Pharmacy, Sichuan University, Chengdu, Sichuan, 610041, P. R. China.*

### Tables of contents

|                                                                                                |    |
|------------------------------------------------------------------------------------------------|----|
| 1. General Information.....                                                                    | 1  |
| 2. Typical Procedure for the Synthesis of Substrates.....                                      | 1  |
| 3. Typical Procedure for the Preparation of 1-(4-(phenylselanyl) phenyl)pyrrolidin-2-ones..... | 2  |
| 4. Typical Procedure for the Preparation of 1-(4-halophenyl)- pyrrolidin-2-ones .....          | 2  |
| 5. Mechanistic Experiments.....                                                                | 2  |
| 6. Further applications .....                                                                  | 2  |
| 6.1 Anti-tumor activity .....                                                                  | 2  |
| 7. Analytic Data .....                                                                         | 3  |
| 8. Crystallographic data for 3a .....                                                          | 13 |
| 9. NMR Spectra .....                                                                           | 17 |
| 10. References .....                                                                           | 52 |

## 1. General Information

The Silica gel F254 plates were used for thin layer chromatography (TLC) in which the spots were examined under UV light at 254 nm. Flash chromatography was performed on silica gel (300-400 mesh). Anhydrous solvents were obtained according to standard procedures. Tetrahydrofuran (THF) was distilled from sodium-benzophenoneketyl. Methylene chloride ( $\text{CH}_2\text{Cl}_2$ ) was distilled over  $\text{P}_2\text{O}_5$ . Methanol (MeOH) was distilled from magnesium. All other commercial reagents were purchased from commercial sources and used as received. NMR spectra were recorded on Varian Mercury spectrometer (400 MHz and 600 MHz).  $^1\text{H}$  NMR spectra were recorded at ambient temperature at 400 MHz or 600 MHz.  $^{13}\text{C}$  NMR spectra were recorded at ambient temperature at 100 MHz or 150 MHz.  $^1\text{H}$ -NMR spectra were referenced to Chloroform-*d* (7.26 ppm) or DMSO-*d*<sub>6</sub> (2.50 ppm), and reported as follows: Chemical shift, multiplicity (s = singlet, d = doublet, t = triplet, q = quartet, m = multiplet). Chemical shifts of the  $^{13}\text{C}$ -NMR spectra were measured relative to chloroform-*d* (77.23 ppm) or DMSO-*d*<sub>6</sub> (39.51 ppm). For  $^1\text{H}$  NMR spectra acquired in  $\text{CD}_3\text{OD}$ , chemical shifts are reported as  $\delta$  values in ppm and are calibrated according to internal  $\text{CD}_3\text{OD}$  (3.31 ppm). For  $^{13}\text{C}$  NMR spectra, chemical shifts are reported as  $\delta$  values in ppm relative to  $\text{CD}_3\text{OD}$ . The NMR data are reported as follows: chemical shift in ppm on the  $\delta$  scale, multiplicity (app = apparent, br = broad, s = singlet, d = doublet, t = triplet, q = quartet, quin = quintet, m = multiplet), coupling constants (Hz), and integration. LCMS/ HRMS were recorded on a Bruker Daltonics Data analysis 3.4 mass spectrometer.

## 2. Typical Procedure for the Synthesis of Substrates

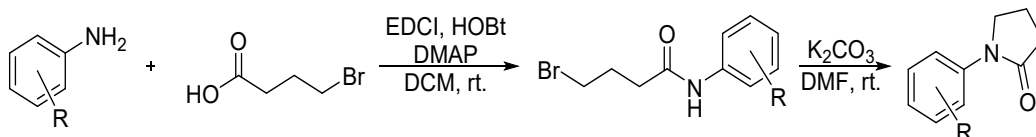

A flame-dried round-bottomed flask was charged with dry DCM (10 mL, 0.1 M), Aniline (1 mmol, 1 eq), 4-Bromobutyric acid (1.2 mmol, 1.2 eq), EDCI (1-(3-dimethylaminopropyl)-3-ethylcarbodiimide hydrochloride, 1.2 mmol, 1.2 eq.), HOBT (1-hydroxybenzotriazole, 1.2 mmol, 1.2 eq) and DMAP (0.2 mmol, 20 mol%). The reaction mixture was stirring for 30 minutes at room temperature, and then the substituted aniline (1 mmol, 1 eq.) was added. After consumption of the starting material (monitored by TLC) the reaction mixture was concentrated under reduced pressure. Then diluted with ethyl acetate (40 mL) and the mixture was washed with 1 M HCl (20 mL) three times. The organic layer was washed with brine and dried with anhydrous  $\text{Na}_2\text{SO}_4$ . The crude product was concentrated for next step without further purified. A solution of the above crude product in dry DMF (5 mL) was added  $\text{K}_2\text{CO}_3$  (2.0 mmol) and the mixture was stirred overnight. After completion of the reaction monitored with TLC, the reaction mixture was diluted with ethyl acetate (40 mL) and washed with saturated NaCl solution ( $3 \times 20$  mL). The combined organic layers were dried over  $\text{MgSO}_4$  and filtered. The solvent was removed *in vacuo*. The resulting product was purified by flash silica gel column chromatography using PE / EA (2:1) as eluent.

### 3. Typical Procedure for the Preparation of 1-(4-(phenylselanyl)phenyl)pyrrolidin-2-ones

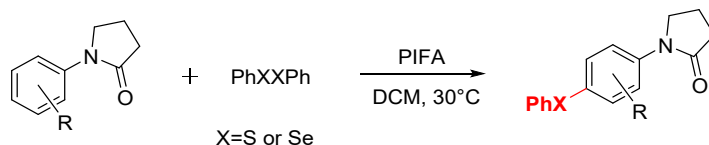

To a solution of 1-phenylpyrrolidin-2-one (0.1 mmol) in DCM (3 mL) was added PIFA (0.25 mmol), PhSeSePh or PhSSPh (0.12 mmol) at 30°C and the solution was stirred for 1 h. The reaction mixture was concentrated under reduced pressure. The resulting product was purified by flash silica gel column chromatography using DCM / EA (60:1) as eluent.

### 4. Typical Procedure for the Preparation of 1-(4-halophenyl)pyrrolidin-2-ones

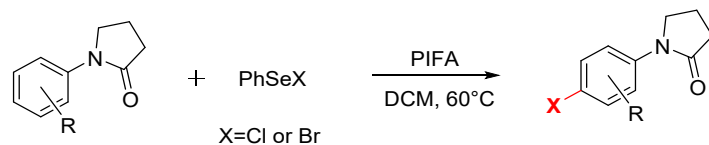

To a solution of 1-phenylpyrrolidin-2-one (0.1 mmol) in DCM (3 mL) was added PIFA (0.25 mmol), PhSeCl or PhSeBr (0.12 mmol) at 60°C and the solution was stirred for 2 h in sealing reaction tube. After consumption of the starting material (monitored by TLC) the reaction mixture was concentrated under reduced pressure. The resulting product was purified by flash silica gel column chromatography using DCM / EA (60:1) as eluent.

### 5. Mechanistic Experiments

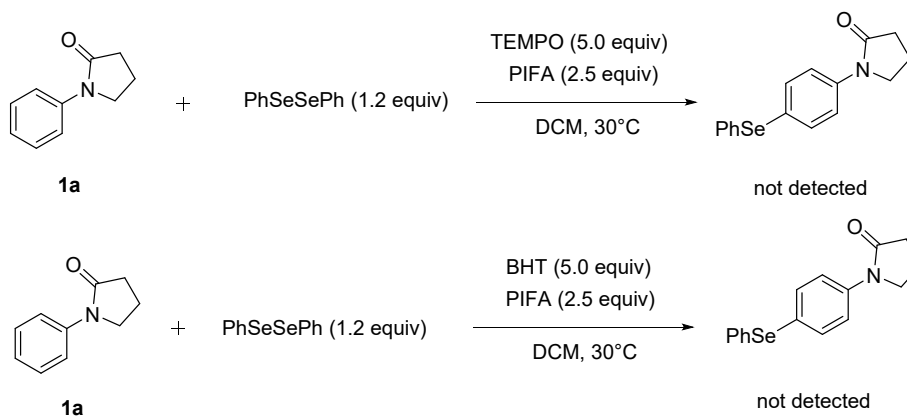

To a solution of **1a** (0.1 mmol) in DCM (3 mL) was added PIFA (0.25 mmol), PhSeSePh (0.12 mmol), TEMPO or BHT (0.5 mmol) at 30 °C and the solution was stirred for 2 h. Sampling after 1 h for TLC detection and analysis. The expected compound was not detected.

### 6. Further applications

#### 6.1 Anti-tumor activity

**In Vitro Antiproliferative Assay:** K562 cell line were initially purchased from the AmericanType

Culture Collection (ATCC, Manassas, VA, USA.). For growth assay in the presence of 1-(4-(phenylselanyl)phenyl)pyrrolidin-2-one derivatives, the cancer cells were plated in plates at a density of 50,000 each well in 5% FBS DMEM medium. The cells were then treated with 1-(4-(phenylselanyl)phenyl)pyrrolidin-2-one derivatives separately at 6 different doses for 4 days, while equal treatment volume of DMSO and adriamycin or mitoxantrone was employed as vehicle control and positive control, respectively. Cell numbers were counted with a Coulter instrument (Beckman-Coulter). The ratio of drug-treated cell numbers to vehicle-treated cell numbers was defined as the survival ratio. IC<sub>50</sub> values were obtained from dose-response curves for each 1-(4-(phenylselanyl)phenyl)pyrrolidin-2-one derivatives.

## 7. Analytic Data

### 1-(*m*-tolyl)pyrrolidin-2-one (**1b**)<sup>1</sup>:

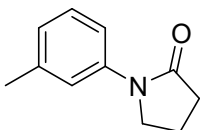

White solid, yield 86%. <sup>1</sup>H NMR (400 MHz, Methanol-*d*<sub>4</sub>) δ 7.40 (s, 1H), 7.35 (d, *J* = 8.3 Hz, 1H), 7.24 (t, *J* = 7.8 Hz, 1H), 7.00 (d, *J* = 7.3 Hz, 1H), 3.96 – 3.80 (m, 2H), 2.65 – 2.48 (m, 2H), 2.34 (s, 3H), 2.23 – 2.02 (m, 2H).

### 1-(3-ethylphenyl)pyrrolidin-2-one (**1c**)<sup>1</sup>:

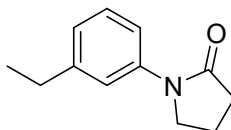

White solid, yield 95%. <sup>1</sup>H NMR (400 MHz, Methanol-*d*<sub>4</sub>) δ 7.44 (s, 1H), 7.35 (d, *J* = 8.2 Hz, 1H), 7.27 (t, *J* = 7.8 Hz, 1H), 7.03 (d, *J* = 7.4 Hz, 1H), 4.06 – 3.79 (m, 2H), 2.65 (q, *J* = 7.6 Hz, 2H), 2.61 – 2.52 (m, 2H), 2.27 – 1.99 (m, 2H), 1.23 (t, *J* = 7.6 Hz, 3H).

### 1-(3-isopropylphenyl)pyrrolidin-2-one (**1d**)<sup>1</sup>:

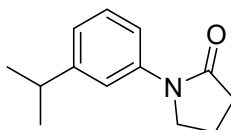

White oil, yield 54%. <sup>1</sup>H NMR (400 MHz, Methanol-*d*<sub>4</sub>) δ 7.51 – 7.45 (m, 1H), 7.37 – 7.31 (m, 1H), 7.28 (t, *J* = 7.8 Hz, 1H), 7.06 (d, *J* = 7.4 Hz, 1H), 3.90 (t, *J* = 7.1 Hz, 2H), 2.90 (hept, *J* = 6.9 Hz, 1H), 2.58 (t, *J* = 8.1 Hz, 2H), 2.16 (p, *J* = 7.5 Hz, 2H), 1.26 (s, 3H), 1.24 (s, 3H).

### 1-(3,5-dimethylphenyl)pyrrolidin-2-one (**1e**)<sup>2</sup>:

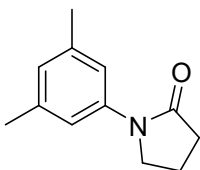

White solid, yield 79%.  $^1\text{H}$  NMR (400 MHz, Methanol- $d_4$ )  $\delta$  7.17 (s, 2H), 6.84 (s, 1H), 3.95 – 3.81 (m, 2H), 2.57 (t,  $J$  = 8.1 Hz, 2H), 2.30 (s, 6H), 2.15 (p,  $J$  = 7.8 Hz, 2H).

**1-(2-fluorophenyl)pyrrolidin-2-one (1f)<sup>1</sup>:**

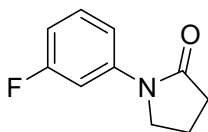

White solid, yield 98%.  $^1\text{H}$  NMR (400 MHz, Methanol- $d_4$ )  $\delta$  7.48 – 7.28 (m, 2H), 7.27 – 7.12 (m, 2H), 3.84 (t,  $J$  = 7.0 Hz, 2H), 2.56 (t,  $J$  = 8.0 Hz, 2H), 2.24 (p,  $J$  = 7.4 Hz, 2H).

**1-(3,5-difluorophenyl)pyrrolidin-2-one (1g)<sup>3</sup>**

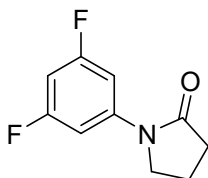

White solid, yield 61%.  $^1\text{H}$  NMR (400 MHz, Chloroform- $d$ )  $\delta$  7.27 (d,  $J$  = 7.8 Hz, 2H), 6.58 (t,  $J$  = 8.8 Hz, 1H), 3.82 (t,  $J$  = 7.0 Hz, 2H), 2.63 (t,  $J$  = 8.1 Hz, 2H), 2.18 (p,  $J$  = 7.6 Hz, 2H).  $^{13}\text{C}$  NMR (101 MHz, Chloroform- $d$ )  $\delta$  174.5, 164.3 (d,  $J$  = 14.8 Hz), 161.9 (d,  $J$  = 14.7 Hz), 141.5 (t,  $J$  = 13.1 Hz), 102.4 (dd,  $J$  = 60.6, 9.0 Hz), 99.4 (t,  $J$  = 25.7 Hz), 48.5, 32.9, 17.7. HRMS(ESI)  $m/z$ : calculated for  $\text{C}_{10}\text{H}_{10}\text{F}_2\text{NO}$   $[\text{M}+\text{H}]^+$  198.0725, found 198.0729.

**1-(3-chlorophenyl)pyrrolidin-2-one (1h)<sup>1</sup>:**

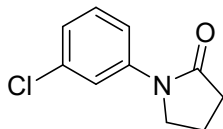

White solid, yield 87%.  $^1\text{H}$  NMR (400 MHz, Methanol- $d_4$ )  $\delta$  7.82 (s, 1H), 7.50 (d,  $J$  = 8.1 Hz, 1H), 7.37 (t,  $J$  = 8.1 Hz, 1H), 7.18 (d,  $J$  = 7.3 Hz, 1H), 3.93 (t,  $J$  = 7.0 Hz, 2H), 2.62 (t,  $J$  = 8.1 Hz, 2H), 2.20 (p,  $J$  = 7.8 Hz, 2H).

**1-(3-bromophenyl)pyrrolidin-2-one (1i)<sup>2</sup>:**

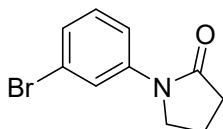

Light red solid, yield 76%.  $^1\text{H}$  NMR (400 MHz, Methanol- $d_4$ )  $\delta$  7.97 – 7.92 (m, 1H), 7.55 – 7.47 (m, 1H), 7.35 – 7.22 (m, 2H), 3.89 (t,  $J$  = 7.1 Hz, 2H), 2.59 (t,  $J$  = 8.1 Hz, 2H), 2.16 (p,  $J$  = 7.5 Hz, 2H).

**1-(3-iodophenyl)pyrrolidin-2-one (1j)<sup>4</sup>:**

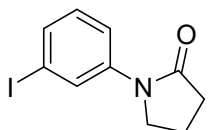

White solid, yield 52%. <sup>1</sup>H NMR (400 MHz, Methanol-*d*<sub>4</sub>) δ 8.10 (s, 1H), 7.63 – 7.43 (m, 2H), 7.22 – 7.02 (m, 1H), 3.96 – 3.80 (m, 2H), 2.58 (t, *J* = 7.3 Hz, 2H), 2.16 (p, *J* = 7.0 Hz, 2H).

**1-(3-(trifluoromethoxy)phenyl)pyrrolidin-2-one(1k):**

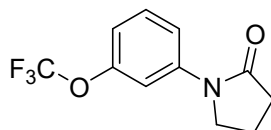

White solid, yield 29%. <sup>1</sup>H NMR (400 MHz, Methanol-*d*<sub>4</sub>) δ 7.80 (s, 1H), 7.51 (d, *J* = 8.4 Hz, 1H), 7.45 (t, *J* = 8.2 Hz, 1H), 7.07 (d, *J* = 8.0 Hz, 1H), 3.93 (t, *J* = 7.1 Hz, 2H), 2.61 (t, *J* = 8.1 Hz, 2H), 2.18 (p, *J* = 7.6 Hz, 2H). <sup>13</sup>C NMR (101 MHz, Methanol-*d*<sub>4</sub>) δ 175.8, 149.2, 140.9, 129.8, 120.5 (q, *J* = 255.8 Hz), 117.9, 116.3, 112.8, 48.8, 32.2, 17.4. HRMS(ESI) *m/z*: calculated for C<sub>11</sub>H<sub>11</sub>F<sub>3</sub>NO<sub>2</sub> [M+H]<sup>+</sup> 246.0736, found 246.0732.

**1-(4-(phenylselanyl)phenyl)pyrrolidin-2-one (3a):**

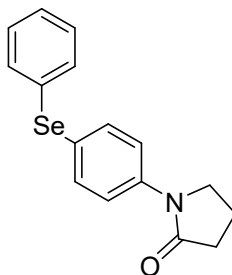

White solid. yield 91%. mp: 55°C-60°C. <sup>1</sup>H NMR (400 MHz, Methanol-*d*<sub>4</sub>) δ 7.56 (d, *J* = 8.7 Hz, 2H), 7.48 (d, *J* = 8.7 Hz, 2H), 7.44 – 7.38 (m, 2H), 7.32 – 7.20 (m, 3H), 3.90 (t, *J* = 7.1 Hz, 2H), 2.58 (t, *J* = 8.1 Hz, 2H), 2.16 (p, *J* = 7.6 Hz, 2H). <sup>13</sup>C NMR (151 MHz, DMSO-*d*<sub>6</sub>) δ 174.5, 140.0, 134.8, 132.0, 131.8, 130.0, 127.6, 123.9, 120.7, 48.4, 32.8, 17.8. <sup>77</sup>Se NMR (76 MHz, DMSO) δ 401.29. HRMS(ESI) *m/z*: calculated for C<sub>16</sub>H<sub>16</sub>NOSe [M+H]<sup>+</sup> 318.0392, found 318.0397.

**1-(3-methyl-4-(phenylselanyl)phenyl)pyrrolidin-2-one (3b):**

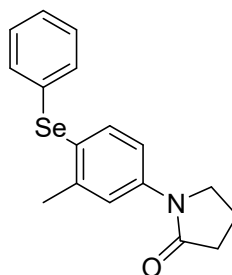

White solid. yield 85%. mp: 59°C-63°C. <sup>1</sup>H NMR (400 MHz, Methanol-*d*<sub>4</sub>) δ 7.56 (s, 1H), 7.48 – 7.28 (m, 4H), 7.27 – 7.14 (m, 3H), 3.89 (t, *J* = 7.0 Hz, 2H), 2.58 (t, *J* = 8.1 Hz, 2H), 2.37 (s, 3H), 2.16 (p, *J* = 7.6 Hz, 2H). <sup>13</sup>C NMR (101 MHz, Methanol-*d*<sub>4</sub>) δ 175.6, 140.9, 139.3, 134.8, 131.6, 131.1, 129.1, 126.8, 126.7, 122.0, 118.7, 49.0, 32.2, 21.5, 17.5. HRMS(ESI) *m/z*: calculated for C<sub>17</sub>H<sub>18</sub>NOSe [M+H]<sup>+</sup> 332.0548, found 332.0547.

**1-(3-ethyl-4-(phenylselanyl)phenyl)pyrrolidin-2-one (3c):**

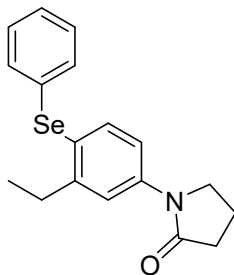

White solid. yield 87%.  $^1\text{H}$  NMR (400 MHz, Methanol- $d_4$ )  $\delta$  7.61 (d,  $J$  = 2.1 Hz, 1H), 7.39 (d,  $J$  = 8.5 Hz, 1H), 7.35 – 7.27 (m, 3H), 7.27 – 7.17 (m, 3H), 3.90 (t,  $J$  = 7.0 Hz, 2H), 2.80 (q,  $J$  = 7.5 Hz, 2H), 2.58 (t,  $J$  = 8.1 Hz, 2H), 2.16 (p,  $J$  = 7.6 Hz, 2H), 1.17 (t,  $J$  = 7.5 Hz, 3H).  $^{13}\text{C}$  NMR (101 MHz, Methanol- $d_4$ )  $\delta$  175.6, 146.9, 139.6, 135.5, 131.7, 131.5, 129.0, 126.7, 126.0, 120.7, 118.7, 49.0, 32.2, 29.1, 17.5, 14.3. HRMS(ESI)  $m/z$ : calculated for  $\text{C}_{18}\text{H}_{20}\text{NOSe}$   $[\text{M}+\text{H}]^+$  346.0705, found 346.0711.

**1-(3-isopropyl-4-(phenylselanyl)phenyl)pyrrolidin-2-one (3d):**

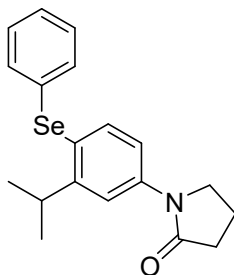

White solid. yield 98%.  $^1\text{H}$  NMR (400 MHz, Methanol- $d_4$ )  $\delta$  7.71 (d,  $J$  = 1.7 Hz, 1H), 7.42 (d,  $J$  = 8.5 Hz, 1H), 7.35 – 7.14 (m, 6H), 3.90 (t,  $J$  = 7.0 Hz, 2H), 3.48 (hept,  $J$  = 6.6 Hz, 1H), 2.58 (t,  $J$  = 8.0 Hz, 2H), 2.16 (p,  $J$  = 7.5 Hz, 2H), 1.18 (s, 3H), 1.17 (s, 3H).  $^{13}\text{C}$  NMR (101 MHz, Methanol- $d_4$ )  $\delta$  175.6, 151.3, 139.9, 135.7, 132.0, 131.5, 129.0, 126.6, 125.8, 118.6, 118.1, 49.0, 33.1, 32.2, 22.5, 17.5. HRMS(ESI)  $m/z$ : calculated for  $\text{C}_{19}\text{H}_{22}\text{NOSe}$   $[\text{M}+\text{H}]^+$  360.0861, found 360.0864.

**1-(3,5-dimethyl-4-(phenylselanyl)phenyl)pyrrolidin-2-one (3e):**

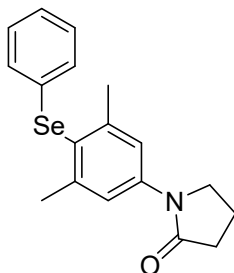

White solid. yield 97%.  $^1\text{H}$  NMR (400 MHz, Methanol- $d_4$ )  $\delta$  7.48 (s, 2H), 7.26 – 7.09 (m, 3H), 7.05 (d,  $J$  = 7.0 Hz, 2H), 3.92 (t,  $J$  = 6.9 Hz, 2H), 2.59 (t,  $J$  = 8.0 Hz, 2H), 2.46 (s, 6H), 2.17 (p,  $J$  = 7.3 Hz, 2H).  $^{13}\text{C}$  NMR (151 MHz, Methanol- $d_4$ )  $\delta$  175.7, 144.1, 139.9, 132.8, 128.9, 128.2, 125.9, 125.4, 119.5, 49.0, 32.2, 23.4, 17.5. HRMS(ESI)  $m/z$ : calculated for  $\text{C}_{18}\text{H}_{20}\text{NOSe}$   $[\text{M}+\text{H}]^+$  346.0705, found 346.0708.

**1-(3-fluoro-4-(phenylselanyl)phenyl)pyrrolidin-2-one (3f):**

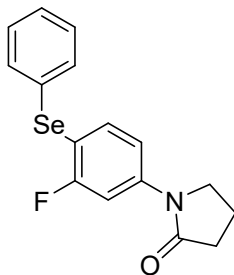

White solid. yield 78%.  $^1\text{H}$  NMR (400 MHz, Methanol- $d_4$ )  $\delta$  7.67 (d,  $J$  = 11.1 Hz, 1H), 7.52 – 7.39 (m, 2H), 7.36 – 7.20 (m, 5H), 3.88 (t,  $J$  = 7.0 Hz, 2H), 2.59 (t,  $J$  = 8.1 Hz, 2H), 2.15 (p,  $J$  = 7.7 Hz, 2H).  $^{13}\text{C}$  NMR (151 MHz, DMSO- $d_6$ )  $\delta$  175.0, 161.5 (d,  $J$  = 240.3 Hz), 142.3 (d,  $J$  = 10.5 Hz), 136.4 (d,  $J$  = 3.2 Hz), 131.9, 130.3, 130.1, 127.9, 116.2 (d,  $J$  = 2.8 Hz), 110.2 (d,  $J$  = 22.8 Hz), 106.8 (d,  $J$  = 28.9 Hz), 48.4, 32.8, 17.6. HRMS(ESI)  $m/z$ : calculated for  $\text{C}_{16}\text{H}_{15}\text{FNOSe}$   $[\text{M}+\text{H}]^+$  336.0297, found 336.0292.

**1-(3,5-difluoro-4-(phenylselanyl)phenyl)pyrrolidin-2-one (3g):**

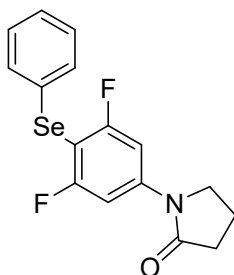

White solid. yield 77%.  $^1\text{H}$  NMR (400 MHz, Methanol- $d_4$ )  $\delta$  7.53 – 7.45 (m, 2H), 7.40 – 7.32 (m, 2H), 7.31 – 7.25 (m, 1H), 7.24 – 7.19 (m, 2H), 3.89 (t,  $J$  = 7.1 Hz, 2H), 2.61 (t,  $J$  = 8.1 Hz, 2H), 2.17 (p,  $J$  = 8.0 Hz, 2H).  $^{13}\text{C}$  NMR (101 MHz, DMSO- $d_6$ )  $\delta$  175.5, 163.1 (dd,  $J$  = 241.5, 8.3 Hz), 143.5 (t,  $J$  = 13.8 Hz), 131.0, 130.4, 130.1, 127.5, 102.7 (dd,  $J$  = 31.0, 2.3 Hz), 98.0 (t,  $J$  = 27.6 Hz), 48.5, 33.0, 17.5. HRMS(ESI)  $m/z$ : calculated for  $\text{C}_{16}\text{H}_{14}\text{F}_2\text{NOSe}$   $[\text{M}+\text{H}]^+$  354.0203, found 354.0189.

**1-(3-chloro-4-(phenylselanyl)phenyl)pyrrolidin-2-one (3h):**

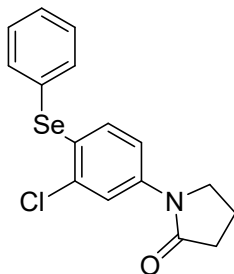

White solid. yield 58%. mp: 58°C-61°C.  $^1\text{H}$  NMR (400 MHz, Methanol- $d_4$ )  $\delta$  7.87 (d,  $J$  = 2.0 Hz, 1H), 7.62 – 7.51 (m, 2H), 7.47 – 7.34 (m, 3H), 7.31 (dd,  $J$  = 8.7, 2.0 Hz, 1H), 7.00 (d,  $J$  = 8.7 Hz, 1H), 3.85 (t,  $J$  = 7.1 Hz, 2H), 2.57 (t,  $J$  = 8.1 Hz, 2H), 2.14 (p,  $J$  = 7.6 Hz, 2H).  $^{13}\text{C}$  NMR (101 MHz, Methanol- $d_4$ )  $\delta$  175.7, 139.1, 135.0, 133.9, 131.4, 129.5, 128.4, 128.3, 128.1, 120.8, 118.9, 48.7, 32.1, 17.3. HRMS(ESI)  $m/z$ : calculated for  $\text{C}_{16}\text{H}_{15}\text{ClNOSe}$   $[\text{M}+\text{H}]^+$  352.0002, found 351.9996.

**1-(3-bromo-4-(phenylselanyl)phenyl)pyrrolidin-2-one (3i):**



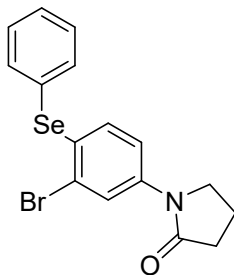

White solid. yield 58%.  $^1\text{H}$  NMR (400 MHz, Methanol- $d_4$ )  $\delta$  8.02 (d,  $J$  = 2.3 Hz, 1H), 7.64 – 7.53 (m, 2H), 7.47 – 7.36 (m, 3H), 7.34 (m, 1H), 6.95 (d,  $J$  = 8.7 Hz, 1H), 3.85 (t,  $J$  = 7.1 Hz, 2H), 2.57 (t,  $J$  = 8.1 Hz, 2H), 2.21 – 2.09 (m, 2H).  $^{13}\text{C}$  NMR (101 MHz, Methanol- $d_4$ )  $\delta$  174.1, 137.3, 133.6, 129.5, 129.3, 128.1, 127.3, 127.0, 122.6, 122.1, 117.9, 47.2, 30.6, 15.8. HRMS(ESI)  $m/z$ : calculated for  $\text{C}_{16}\text{H}_{15}\text{BrNOSe}$   $[\text{M}+\text{H}]^+$  395.9497, found 395.9493.

**1-(3-iodo-4-(phenylselanyl)phenyl)pyrrolidin-2-one (3j):**

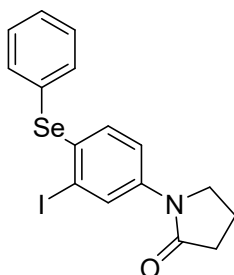

White solid. yield 84%.  $^1\text{H}$  NMR (400 MHz, Methanol- $d_4$ )  $\delta$  8.22 (d,  $J$  = 2.0 Hz, 1H), 7.65 – 7.51 (m, 2H), 7.47 – 7.31 (m, 3H), 6.96 (d,  $J$  = 8.7 Hz, 2H), 3.84 (t,  $J$  = 7.0 Hz, 2H), 2.56 (t,  $J$  = 8.0 Hz, 2H), 2.19 – 2.11 (m, 2H).  $^{13}\text{C}$  NMR (101 MHz, DMSO- $d_6$ )  $\delta$  174.7, 139.7, 134.4, 133.3, 131.9, 130.8, 130.6, 130.0, 129.0, 120.4, 102.6, 48.3, 32.7, 17.7. HRMS(ESI)  $m/z$ : calculated for  $\text{C}_{16}\text{H}_{15}\text{INOSe}$   $[\text{M}+\text{H}]^+$  443.9358, found 443.9355.

**1-(4-(phenylselanyl)-3-(trifluoromethoxy)phenyl)pyrrolidin-2-one (3k):**

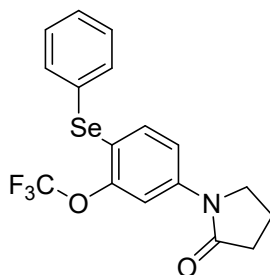

White solid. yield 56%. mp: 60°C-62°C.  $^1\text{H}$  NMR (400 MHz, Methanol- $d_4$ )  $\delta$  7.97 (s, 1H), 7.59 – 7.48 (m, 2H), 7.43 – 7.32 (m, 3H), 7.30 (m, 1H), 7.18 (d,  $J$  = 8.7 Hz, 1H), 3.87 (t,  $J$  = 7.1 Hz, 2H), 2.59 (t,  $J$  = 8.1 Hz, 2H), 2.16 (p,  $J$  = 7.6 Hz, 2H).  $^{13}\text{C}$  NMR (101 MHz, Methanol- $d_4$ )  $\delta$  175.8, 147.4 (q,  $J$  = 1.6 Hz), 139.8, 134.5, 133.0, 129.4, 128.2, 128.1, 121.0, 120.6 (q,  $J$  = 258.3 Hz), 118.5, 112.6 (q,  $J$  = 1.5 Hz), 48.6, 32.2, 17.3. HRMS(ESI)  $m/z$ : calculated for  $\text{C}_{17}\text{H}_{15}\text{F}_3\text{NO}_2\text{Se}$   $[\text{M}+\text{H}]^+$  402.0215, found 402.0215.

**5-oxo-1-(4-(phenylselanyl)phenyl)pyrrolidine-3-carboxylic acid (3l):**

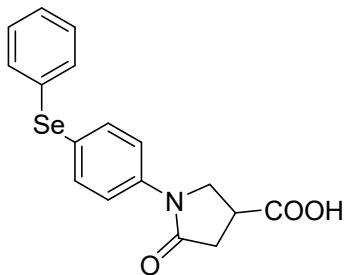

White solid. yield 56%.  $^1\text{H}$  NMR (400 MHz, Methanol- $d_4$ )  $\delta$  7.46 (d,  $J$  = 8.3 Hz, 2H), 7.38 (d,  $J$  = 8.3 Hz, 2H), 7.36 – 7.26 (m, 2H), 7.25 – 7.08 (m, 3H), 4.21 – 3.85 (m, 2H), 3.45 – 3.27 (m, 1H), 2.77 (d,  $J$  = 7.9 Hz, 2H).  $^{13}\text{C}$  NMR (101 MHz, Methanol- $d_4$ )  $\delta$  174.5, 173.3, 138.4, 133.6, 132.3, 131.2, 129.1, 127.0, 126.8, 121.3, 50.8, 35.5, 35.1. HRMS(ESI)  $m/z$ : calculated for  $\text{C}_{17}\text{H}_{16}\text{NO}_3\text{Se}$   $[\text{M}+\text{H}]^+$  362.0290, found 362.0292.

**1-(4-(phenylselanyl)phenyl)piperidin-2-one (3m):**

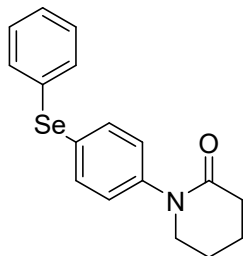

White solid. yield 44%.  $^1\text{H}$  NMR (400 MHz, Methanol- $d_4$ )  $\delta$  7.58 – 7.41 (m, 4H), 7.40 – 7.24 (m, 3H), 7.24 – 7.13 (m, 2H), 3.65 (t,  $J$  = 5.3 Hz, 2H), 2.50 (t,  $J$  = 6.1 Hz, 2H), 2.10 – 1.76 (m, 4H).  $^{13}\text{C}$  NMR (101 MHz, Methanol- $d_4$ )  $\delta$  171.5, 142.4, 133.3, 133.0, 130.6, 129.9, 129.2, 127.4, 127.2, 51.6, 32.0, 22.9, 20.7. HRMS(ESI)  $m/z$ : calculated for  $\text{C}_{17}\text{H}_{18}\text{NOSe}$   $[\text{M}+\text{H}]^+$  332.0548, found 332.0548.

**1-(3-chloro-4-(phenylselanyl)phenyl)piperidin-2-one (3n):**

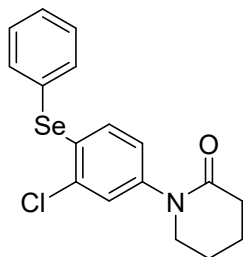

White solid. yield 36%.  $^1\text{H}$  NMR (400 MHz, Methanol- $d_4$ )  $\delta$  7.68 – 7.56 (m, 2H), 7.50 – 7.31 (m, 4H), 7.05 – 6.98 (m, 1H), 6.98-6.92 (m, 1H), 3.62 (t,  $J$  = 5.3 Hz, 2H), 2.48 (t,  $J$  = 6.1 Hz, 2H), 2.10 – 1.75 (m, 4H).  $^{13}\text{C}$  NMR (151 MHz, Methanol- $d_4$ )  $\delta$  171.5, 142.4, 135.7, 133.1, 132.0, 130.9, 129.6, 128.8, 127.6, 127.3, 125.3, 51.5, 32.0, 22.8, 20.6. HRMS(ESI)  $m/z$ : calculated for  $\text{C}_{17}\text{H}_{17}\text{ClNOSe}$   $[\text{M}+\text{H}]^+$  366.0158, found 366.0153.

**N-(2-(phenylselanyl)phenyl)acetamide (3o):**

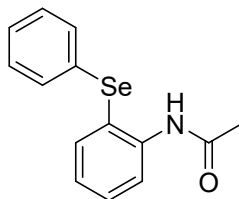

White solid. yield 34%.  $^1\text{H}$  NMR (400 MHz, Methanol- $d_4$ )  $\delta$  7.58 (d,  $J = 7.6$  Hz, 1H), 7.51 – 7.18 (m, 7H), 7.11 (t,  $J = 7.3$  Hz, 1H), 2.02 (s, 3H).  $^{13}\text{C}$  NMR (101 MHz, Methanol- $d_4$ )  $\delta$  170.7, 137.7, 134.5, 132.3, 130.4, 129.2, 128.4, 127.2, 126.4, 126.3, 125.4, 21.7. HRMS(ESI)  $m/z$ : calculated for  $\text{C}_{14}\text{H}_{14}\text{NOSe}$   $[\text{M}+\text{H}]^+$  292.0235, found 292.0232.

**(E)-1-(2-(phenylselanyl)vinyl)pyrrolidin-2-one (3p):**

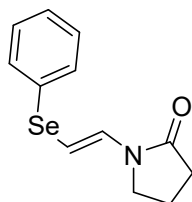

White solid. yield 19%.  $^1\text{H}$  NMR (400 MHz, Methanol- $d_4$ )  $\delta$  7.43 (d,  $J = 6.6$  Hz, 2H), 7.36 (d,  $J = 14.0$  Hz, 1H), 7.31 – 7.15 (m, 3H), 6.06 (d,  $J = 14.0$  Hz, 1H), 3.65 (t,  $J = 6.8$  Hz, 2H), 2.50 (t,  $J = 7.9$  Hz, 2H), 2.27 – 1.99 (m, 2H).  $^{13}\text{C}$  NMR (101 MHz, Methanol- $d_4$ )  $\delta$  174.2, 132.1, 131.6, 130.2, 128.9, 126.3, 97.1, 45.1, 30.5, 17.0. HRMS(ESI)  $m/z$ : calculated for  $\text{C}_{12}\text{H}_{14}\text{NOSe}$   $[\text{M}+\text{H}]^+$  268.0235, found 268.0232.

**3,4-bis(phenylselanyl)-1H-pyrrole-2,5-dione (3q):**

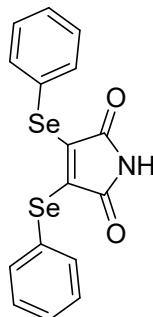

Yellow solid. yield 43%. mp: 117°C-120°C.  $^1\text{H}$  NMR (400 MHz, Methanol- $d_4$ )  $\delta$  7.45 – 7.38 (m, 4H), 7.35 – 7.30 (m, 2H), 7.30 – 7.23 (m, 4H).  $^{13}\text{C}$  NMR (151 MHz, Methanol- $d_4$ )  $\delta$  168.4, 139.2, 133.8, 129.0, 128.1, 126.5. HRMS(ESI)  $m/z$ : calculated for  $\text{C}_{16}\text{H}_{11}\text{NO}_2\text{Se}_2\text{Na}$   $[\text{M}+\text{Na}]^+$  431.9012, found 431.9004.

**1-(4-(phenylthio)phenyl)pyrrolidin-2-one (3r):**

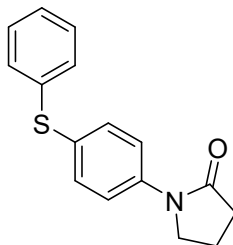

White oil. yield 40%.  $^1\text{H}$  NMR (400 MHz, Methanol- $d_4$ )  $\delta$  7.66 – 7.56 (m, 2H), 7.41 – 7.33 (m, 2H), 7.32 – 7.17 (m, 5H), 3.91 (t,  $J$  = 7.1 Hz, 2H), 2.59 (t,  $J$  = 8.1 Hz, 2H), 2.17 (p,  $J$  = 7.5 Hz, 2H).  $^{13}\text{C}$  NMR (101 MHz, Methanol- $d_4$ )  $\delta$  175.6, 138.6, 136.3, 131.8, 131.2, 130.1, 128.9, 126.6, 121.1, 49.0, 32.2, 17.5. HRMS(ESI)  $m/z$ : calculated for  $\text{C}_{16}\text{H}_{16}\text{NOS}$   $[\text{M}+\text{H}]^+$  270.0947, found 270.0945.

**1-(3-methyl-4-(phenylthio)phenyl)pyrrolidin-2-one (3s):**

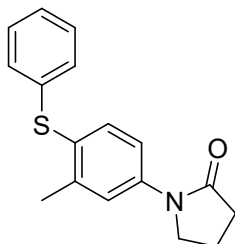

White oil. yield 66%.  $^1\text{H}$  NMR (400 MHz, Methanol- $d_4$ )  $\delta$  7.64 – 7.55 (m, 1H), 7.48 – 7.41 (m, 1H), 7.37 – 7.31 (m, 1H), 7.29 – 7.22 (m, 2H), 7.20 – 7.14 (m, 1H), 7.13 – 7.07 (m, 2H), 3.91 (t,  $J$  = 7.1 Hz, 2H), 2.59 (t,  $J$  = 8.1 Hz, 2H), 2.34 (s, 3H), 2.17 (p,  $J$  = 7.6 Hz, 2H).  $^{13}\text{C}$  NMR (101 MHz, Methanol- $d_4$ )  $\delta$  175.7, 141.1, 139.5, 136.6, 134.1, 128.9, 128.8, 128.4, 125.9, 122.3, 118.6, 49.0, 32.2, 19.6, 17.5. HRMS(ESI)  $m/z$ : calculated for  $\text{C}_{17}\text{H}_{18}\text{NOS}$   $[\text{M}+\text{H}]^+$  284.1104, found 284.1102.

**1-(4-chlorophenyl)pyrrolidin-2-one (5a)<sup>1</sup>**

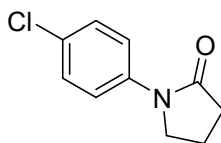

White solid. yield 69%.  $^1\text{H}$  NMR (400 MHz, Methanol- $d_4$ )  $\delta$  7.61 (d,  $J$  = 8.9 Hz, 2H), 7.36 (d,  $J$  = 8.9 Hz, 2H), 3.90 (t,  $J$  = 7.1 Hz, 2H), 2.59 (t,  $J$  = 8.1 Hz, 2H), 2.17 (p,  $J$  = 7.5 Hz, 2H).  $^{13}\text{C}$  NMR (101 MHz, Methanol- $d_4$ )  $\delta$  175.6, 138.0, 129.6, 128.4, 121.7, 49.0, 32.1, 17.5. HRMS(ESI)  $m/z$ : calculated for  $\text{C}_{10}\text{H}_{11}\text{ClNO}$   $[\text{M}+\text{H}]^+$  196.0524, found 196.0520.

**1-(4-bromophenyl)pyrrolidin-2-one (5b)<sup>5</sup>**

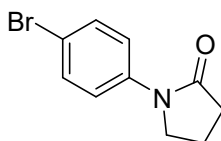

White solid. yield 96%.  $^1\text{H}$  NMR (400 MHz, Methanol- $d_4$ )  $\delta$  7.74 – 7.28 (m, 4H), 4.01 – 3.71 (m, 2H), 2.69 – 2.43 (m, 2H), 2.27 – 2.00 (m, 2H).  $^{13}\text{C}$  NMR (101 MHz, Methanol- $d_4$ )  $\delta$  175.6, 138.5, 131.4, 121.9, 117.1, 48.9, 32.1, 17.4. HRMS(ESI)  $m/z$ : calculated for  $\text{C}_{10}\text{H}_{11}\text{BrNO}$   $[\text{M}+\text{H}]^+$  240.0019, found 240.0018.

**1-(4-chloro-3-methylphenyl)pyrrolidin-2-one (5c)**

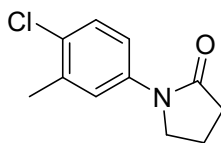

White solid. yield 62%.  $^1\text{H}$  NMR (400 MHz, Methanol- $d_4$ )  $\delta$  7.56 (d,  $J$  = 2.6 Hz, 1H), 7.43 (dd,  $J$  = 8.7, 2.6 Hz, 1H), 7.33 (d,  $J$  = 8.7 Hz, 1H), 3.89 (t,  $J$  = 7.1 Hz, 2H), 2.58 (t,  $J$  = 8.1 Hz, 2H), 2.36 (s, 3H), 2.16 (p,

$J = 7.6$  Hz, 2H).  $^{13}\text{C}$  NMR (101 MHz, Methanol- $d_4$ )  $\delta$  175.6, 137.9, 136.1, 129.8, 128.7, 122.7, 119.3, 49.07, 32.1, 18.9, 17.5. HRMS(ESI)  $m/z$ : calculated for  $\text{C}_{11}\text{H}_{13}\text{ClNO}$   $[\text{M}+\text{H}]^+$  210.0680, found 210.0680.

**1-(4-bromo-3,5-dimethylphenyl)pyrrolidin-2-one (5d)**

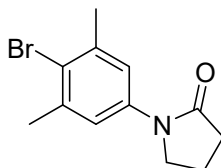

White solid. yield 81%.  $^1\text{H}$  NMR (400 MHz, Methanol- $d_4$ )  $\delta$  7.40 (s, 2H), 3.88 (t,  $J = 7.1$  Hz, 2H), 2.57 (t,  $J = 8.1$  Hz, 2H), 2.40 (s, 6H), 2.16 (p,  $J = 7.5$  Hz, 2H).  $^{13}\text{C}$  NMR (101 MHz, Methanol- $d_4$ )  $\delta$  175.6, 138.3, 137.9, 122.4, 120.2, 49.1, 32.2, 22.7, 17.5. HRMS(ESI)  $m/z$ : calculated for  $\text{C}_{12}\text{H}_{15}\text{BrNO}$   $[\text{M}+\text{H}]^+$  268.0337, found 268.0332.

**1-(3,4-dibromophenyl)pyrrolidin-2-one (5e)**

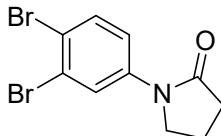

White solid. yield 76%.  $^1\text{H}$  NMR (400 MHz, Methanol- $d_4$ )  $\delta$  8.12 (d,  $J = 2.6$  Hz, 1H), 7.65 (d,  $J = 8.8$  Hz, 1H), 7.49 (dd,  $J = 8.8, 2.6$  Hz, 1H), 3.88 (t,  $J = 7.0$  Hz, 2H), 2.59 (t,  $J = 8.1$  Hz, 2H), 2.17 (p,  $J = 7.6$  Hz, 2H).  $^{13}\text{C}$  NMR (101 MHz, Methanol- $d_4$ )  $\delta$  175.8, 139.6, 133.2, 124.7, 124.1, 120.0, 118.9, 48.6, 32.1, 17.3. HRMS(ESI)  $m/z$ : calculated for  $\text{C}_{10}\text{H}_9\text{Br}_2\text{NO}$   $[\text{M}+\text{H}]^+$  317.9124, found 317.9124.

**1-(4-chloro-3-iodophenyl)pyrrolidin-2-one (5f)**

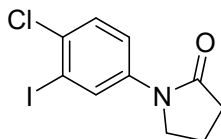

White solid. yield 50%.  $^1\text{H}$  NMR (400 MHz, Methanol- $d_4$ )  $\delta$  8.29 (d,  $J = 2.6$  Hz, 1H), 7.59 (dd,  $J = 8.8, 2.6$  Hz, 1H), 7.47 (d,  $J = 8.8$  Hz, 1H), 3.88 (t,  $J = 7.1$  Hz, 2H), 2.59 (t,  $J = 8.1$  Hz, 2H), 2.16 (p,  $J = 7.6$  Hz, 2H).  $^{13}\text{C}$  NMR (101 MHz, Chloroform- $d$ )  $\delta$  174.3, 138.6, 133.8, 130.6, 129.0, 120.7, 97.8, 48.5, 32.6, 17.8. HRMS(ESI)  $m/z$ : calculated for  $\text{C}_{10}\text{H}_9\text{ClINO}$   $[\text{M}+\text{H}]^+$  321.9490, found 321.9492.

**1-(4-bromo-3-iodophenyl)pyrrolidin-2-one (5g)**

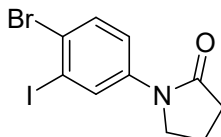

White solid. yield 84%.  $^1\text{H}$  NMR (400 MHz, Methanol- $d_4$ )  $\delta$  8.30 (d,  $J = 2.6$  Hz, 1H), 7.63 (d,  $J = 8.8$  Hz, 1H), 7.51 (dd,  $J = 8.8, 2.6$  Hz, 1H), 3.87 (t,  $J = 7.1$  Hz, 2H), 2.58 (t,  $J = 8.1$  Hz, 2H), 2.16 (p,  $J = 7.5$  Hz, 2H).  $^{13}\text{C}$  NMR (101 MHz, Chloroform- $d$ )  $\delta$  174.3, 139.1, 132.4, 130.7, 124.4, 120.8, 101.0, 48.5, 32.7, 17.8. HRMS(ESI)  $m/z$ : calculated for  $\text{C}_{10}\text{H}_9\text{BrINO}$   $[\text{M}+\text{H}]^+$  365.8985, found 365.8980.

**1-(4-chlorophenyl)-5-oxopyrrolidine-3-carboxylic acid (5h)**

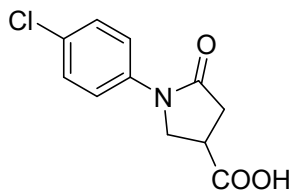

White solid. yield 67%.  $^1\text{H}$  NMR (400 MHz, DMSO- $d_6$ )  $\delta$  12.56 (s, 1H), 7.69 (d,  $J$  = 9.0 Hz, 2H), 7.43 (d,  $J$  = 9.0 Hz, 2H), 4.13 – 3.84 (m, 2H), 2.92 – 2.61 (m, 2H), 1.91 (s, 1H).  $^{13}\text{C}$  NMR (101 MHz, DMSO- $d_6$ )  $\delta$  174.6, 172.5, 138.5, 129.1, 128.3, 121.4, 50.3, 35.6, 35.5. HRMS(ESI)  $m/z$ : calculated for  $\text{C}_{11}\text{H}_{11}\text{ClNO}_3$   $[\text{M}+\text{H}]^+$  240.0422, found 240.0411.

#### 1-(4-bromophenyl)piperidin-2-one (5i)

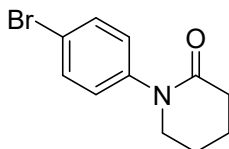

White solid. yield 63%.  $^1\text{H}$  NMR (400 MHz, Methanol- $d_4$ )  $\delta$  7.55 (d,  $J$  = 8.4 Hz, 2H), 7.20 (d,  $J$  = 8.4 Hz, 2H), 3.65 (t,  $J$  = 5.4 Hz, 2H), 2.50 (t,  $J$  = 6.1 Hz, 2H), 2.08 – 1.81 (m, 4H).  $^{13}\text{C}$  NMR (101 MHz, Methanol- $d_4$ )  $\delta$  171.5, 142.3, 132.0, 128.2, 120.0, 51.6, 32.0, 22.8, 20.7. HRMS(ESI)  $m/z$ : calculated for  $\text{C}_{11}\text{H}_{13}\text{BrNO}$   $[\text{M}+\text{H}]^+$  254.0175, found 254.0171.

## 8. Crystallographic data for 3a

Table 1 Crystal data and structure refinement for 3a.

|                                  |                                            |
|----------------------------------|--------------------------------------------|
| CCDC                             | 2183282                                    |
| Empirical formula                | $\text{C}_{16}\text{H}_{15}\text{NOSe}$    |
| Formula weight                   | 316.25                                     |
| Temperature/K                    | 293.15                                     |
| Crystal system                   | monoclinic                                 |
| Space group                      | $\text{P}2_1/\text{c}$                     |
| $a/\text{\AA}$                   | 15.9417(14)                                |
| $b/\text{\AA}$                   | 7.4061(8)                                  |
| $c/\text{\AA}$                   | 12.3726(14)                                |
| $\alpha/^\circ$                  | 90                                         |
| $\beta/^\circ$                   | 107.420(11)                                |
| $\gamma/^\circ$                  | 90                                         |
| Volume/ $\text{\AA}^3$           | 1393.8(3)                                  |
| $Z$                              | 4                                          |
| $\rho_{\text{calc}}/\text{cm}^3$ | 1.507                                      |
| $\mu/\text{mm}^{-1}$             | 2.685                                      |
| $F(000)$                         | 640.0                                      |
| Crystal size/ $\text{mm}^3$      | $0.35 \times 0.3 \times 0.25$              |
| Radiation                        | $\text{MoK}\alpha$ ( $\lambda = 0.71073$ ) |

|                                                  |                                                               |
|--------------------------------------------------|---------------------------------------------------------------|
| 2 $\theta$ range for data collection/ $^{\circ}$ | 6.118 to 52.742                                               |
| Index ranges                                     | $-19 \leq h \leq 13, -8 \leq k \leq 9, -12 \leq l \leq 15$    |
| Reflections collected                            | 6701                                                          |
| Independent reflections                          | 2839 [ $R_{\text{int}} = 0.0322, R_{\text{sigma}} = 0.0536$ ] |
| Data/restraints/parameters                       | 2839/0/172                                                    |
| Goodness-of-fit on $F^2$                         | 1.013                                                         |
| Final R indexes [ $I \geq 2\sigma(I)$ ]          | $R_1 = 0.0472, wR_2 = 0.0877$                                 |
| Final R indexes [all data]                       | $R_1 = 0.0937, wR_2 = 0.1057$                                 |
| Largest diff. peak/hole / $e \text{ \AA}^{-3}$   | 0.30/-0.43                                                    |

**Table 2 Fractional Atomic Coordinates ( $\times 10^4$ ) and Equivalent Isotropic Displacement Parameters ( $\text{\AA}^2 \times 10^3$ ) for 3a.  $U_{\text{eq}}$  is defined as 1/3 of of the trace of the orthogonalised  $U_{ij}$  tensor.**

| Atom | x          | y         | z          | U(eq)    |
|------|------------|-----------|------------|----------|
| Se1  | 1292.5(3)  | 8293.5(6) | 4772.4(4)  | 81.9(2)  |
| O1   | 5844.7(16) | 8380(4)   | 6304(2)    | 72.1(8)  |
| N1   | 5138.9(16) | 8780(3)   | 7652.5(19) | 39.3(6)  |
| C1   | 1213(2)    | 10106(5)  | 3644(3)    | 59.7(10) |
| C2   | 902(2)     | 9650(7)   | 2518(4)    | 75.2(12) |
| C3   | 829(3)     | 10953(9)  | 1704(4)    | 90.4(15) |
| C4   | 1056(3)    | 12696(8)  | 1997(4)    | 89.5(15) |
| C5   | 1377(3)    | 13161(6)  | 3121(4)    | 80.5(13) |
| C6   | 1453(3)    | 11871(6)  | 3940(4)    | 69.7(11) |
| C7   | 2494(2)    | 8603(4)   | 5660(3)    | 50.7(9)  |
| C8   | 3145(2)    | 9014(4)   | 5169(3)    | 47.5(8)  |
| C9   | 4011(2)    | 9088(4)   | 5815(3)    | 44.0(8)  |
| C10  | 4254(2)    | 8735(4)   | 6968(3)    | 38.9(7)  |
| C11  | 3592(2)    | 8353(4)   | 7455(3)    | 48.9(9)  |
| C12  | 2728(2)    | 8297(4)   | 6799(3)    | 55.6(9)  |
| C13  | 5858(2)    | 8537(4)   | 7284(3)    | 45.6(8)  |
| C14  | 6654(2)    | 8457(4)   | 8296(3)    | 49.1(8)  |
| C15  | 6351(2)    | 9049(5)   | 9286(3)    | 55.9(9)  |
| C16  | 5362(2)    | 8837(5)   | 8883(2)    | 52.0(9)  |

**Table 3 Anisotropic Displacement Parameters ( $\text{\AA}^2 \times 10^3$ ) for 3a. The Anisotropic displacement factor exponent takes the form:  $-2\pi^2[h^2a^{*2}U_{11}+2hka^*b^*U_{12}+\dots]$ .**

| Atom | U <sub>11</sub> | U <sub>22</sub> | U <sub>33</sub> | U <sub>23</sub> | U <sub>13</sub> | U <sub>12</sub> |
|------|-----------------|-----------------|-----------------|-----------------|-----------------|-----------------|
| Se1  | 53.0(3)         | 80.4(4)         | 97.8(4)         | 9.6(2)          | 0.7(2)          | -19.1(2)        |
| O1   | 57.7(16)        | 126(2)          | 37.5(15)        | 1.5(14)         | 21.2(12)        | 12.0(14)        |
| N1   | 46.0(16)        | 45.3(15)        | 26.7(14)        | 1.9(12)         | 11.1(12)        | 1.4(12)         |
| C1   | 33.9(19)        | 75(3)           | 64(3)           | -4(2)           | 4.9(17)         | 2.4(18)         |
| C2   | 44(2)           | 98(3)           | 75(3)           | -19(3)          | 5(2)            | 4(2)            |
| C3   | 60(3)           | 144(5)          | 61(3)           | -10(4)          | 10(2)           | 20(3)           |
| C4   | 61(3)           | 127(5)          | 80(4)           | 25(3)           | 20(3)           | 27(3)           |
| C5   | 74(3)           | 79(3)           | 89(4)           | 11(3)           | 25(3)           | 7(2)            |
| C6   | 66(3)           | 73(3)           | 62(3)           | 0(2)            | 8(2)            | -2(2)           |
| C7   | 46(2)           | 42(2)           | 60(2)           | -3.0(18)        | 10.3(18)        | -2.8(16)        |
| C8   | 55(2)           | 45(2)           | 37.6(19)        | -2.4(16)        | 7.0(16)         | 2.9(17)         |
| C9   | 50(2)           | 47(2)           | 36.7(19)        | 3.9(16)         | 15.0(15)        | 0.8(16)         |
| C10  | 47.2(19)        | 34.1(17)        | 37.6(19)        | -1.1(15)        | 16.3(15)        | -1.8(14)        |
| C11  | 58(2)           | 52(2)           | 42(2)           | 9.4(17)         | 22.4(17)        | 2.0(17)         |
| C12  | 49(2)           | 58(2)           | 66(3)           | 10(2)           | 26.7(19)        | -2.4(18)        |
| C13  | 45(2)           | 48(2)           | 43(2)           | 2.4(17)         | 12.4(16)        | -0.1(15)        |
| C14  | 49(2)           | 45(2)           | 49(2)           | 3.3(17)         | 8.9(16)         | -2.5(16)        |
| C15  | 66(2)           | 50(2)           | 43(2)           | -2.2(17)        | 3.4(18)         | -0.2(18)        |
| C16  | 59(2)           | 64(2)           | 33.5(19)        | 1.9(17)         | 14.8(16)        | 9.7(18)         |

**Table 4 Bond Lengths for 3a.**

| Atom | Atom | Length/Å | Atom | Atom | Length/Å |
|------|------|----------|------|------|----------|
| Se1  | C1   | 1.914(4) | C5   | C6   | 1.371(5) |
| Se1  | C7   | 1.915(3) | C7   | C8   | 1.384(4) |
| O1   | C13  | 1.212(4) | C7   | C12  | 1.365(5) |
| N1   | C10  | 1.412(4) | C8   | C9   | 1.374(4) |
| N1   | C13  | 1.367(4) | C9   | C10  | 1.386(4) |
| N1   | C16  | 1.457(4) | C10  | C11  | 1.392(4) |
| C1   | C2   | 1.373(5) | C11  | C12  | 1.374(5) |
| C1   | C6   | 1.380(5) | C13  | C14  | 1.494(4) |
| C2   | C3   | 1.374(6) | C14  | C15  | 1.510(4) |
| C3   | C4   | 1.360(6) | C15  | C16  | 1.512(4) |
| C4   | C5   | 1.375(6) |      |      |          |

**Table 5 Bond Angles for 3a.**



| Atom | Atom | Atom | Angle/°   | Atom | Atom | Atom | Angle/°  |
|------|------|------|-----------|------|------|------|----------|
| C1   | Se1  | C7   | 99.84(14) | C12  | C7   | C8   | 118.8(3) |
| C10  | N1   | C16  | 121.0(2)  | C9   | C8   | C7   | 120.5(3) |
| C13  | N1   | C10  | 125.8(3)  | C8   | C9   | C10  | 120.9(3) |
| C13  | N1   | C16  | 112.7(3)  | C9   | C10  | N1   | 122.3(3) |
| C2   | C1   | Se1  | 119.5(3)  | C9   | C10  | C11  | 118.0(3) |
| C2   | C1   | C6   | 119.3(4)  | C11  | C10  | N1   | 119.7(3) |
| C6   | C1   | Se1  | 121.2(3)  | C12  | C11  | C10  | 120.4(3) |
| C1   | C2   | C3   | 119.8(4)  | C7   | C12  | C11  | 121.3(3) |
| C4   | C3   | C2   | 120.9(4)  | O1   | C13  | N1   | 125.5(3) |
| C3   | C4   | C5   | 119.7(5)  | O1   | C13  | C14  | 126.3(3) |
| C6   | C5   | C4   | 119.8(5)  | N1   | C13  | C14  | 108.2(3) |
| C5   | C6   | C1   | 120.5(4)  | C13  | C14  | C15  | 105.7(3) |
| C8   | C7   | Se1  | 121.8(3)  | C14  | C15  | C16  | 105.0(3) |
| C12  | C7   | Se1  | 119.2(3)  | N1   | C16  | C15  | 104.6(2) |

**Table 6 Torsion Angles for 3a.**

| A   | B   | C   | D   | Angle/°   | A   | B   | C   | D   | Angle/°   |
|-----|-----|-----|-----|-----------|-----|-----|-----|-----|-----------|
| Se1 | C1  | C2  | C3  | 178.9(3)  | C8  | C9  | C10 | C11 | -1.8(4)   |
| Se1 | C1  | C6  | C5  | -178.8(3) | C9  | C10 | C11 | C12 | 1.2(4)    |
| Se1 | C7  | C8  | C9  | -174.9(2) | C10 | N1  | C13 | O1  | 5.8(5)    |
| Se1 | C7  | C12 | C11 | 174.4(2)  | C10 | N1  | C13 | C14 | -172.9(3) |
| O1  | C13 | C14 | C15 | 170.3(3)  | C10 | N1  | C16 | C15 | -174.8(3) |
| N1  | C10 | C11 | C12 | -179.7(3) | C10 | C11 | C12 | C7  | 0.3(5)    |
| N1  | C13 | C14 | C15 | -11.0(3)  | C12 | C7  | C8  | C9  | 0.9(5)    |
| C1  | C2  | C3  | C4  | -0.4(6)   | C13 | N1  | C10 | C9  | -24.1(4)  |
| C2  | C1  | C6  | C5  | 0.5(6)    | C13 | N1  | C10 | C11 | 156.9(3)  |
| C2  | C3  | C4  | C5  | 1.1(6)    | C13 | N1  | C16 | C15 | 13.2(4)   |
| C3  | C4  | C5  | C6  | -1.0(7)   | C13 | C14 | C15 | C16 | 18.5(3)   |
| C4  | C5  | C6  | C1  | 0.2(6)    | C14 | C15 | C16 | N1  | -19.1(3)  |
| C6  | C1  | C2  | C3  | -0.4(5)   | C16 | N1  | C10 | C9  | 165.1(3)  |
| C7  | C8  | C9  | C10 | 0.7(5)    | C16 | N1  | C10 | C11 | -13.9(4)  |
| C8  | C7  | C12 | C11 | -1.4(5)   | C16 | N1  | C13 | O1  | 177.3(3)  |
| C8  | C9  | C10 | N1  | 179.2(3)  | C16 | N1  | C13 | C14 | -1.4(3)   |

**Table 7 Hydrogen Atom Coordinates ( $\text{\AA} \times 10^4$ ) and Isotropic Displacement Parameters ( $\text{\AA}^2 \times 10^3$ )**

for 3a.

| Atom | x       | y        | z       | U(eq) |
|------|---------|----------|---------|-------|
| H2   | 741.58  | 8464.21  | 2307.29 | 90    |
| H3   | 621.44  | 10638.32 | 942.42  | 108   |
| H4   | 994.56  | 13569.36 | 1438.29 | 107   |
| H5   | 1541.08 | 14346.92 | 3325.75 | 97    |
| H6   | 1668.27 | 12187.53 | 4700.73 | 84    |
| H8   | 2994.44 | 9241.08  | 4394.83 | 57    |
| H9   | 4440.13 | 9379.36  | 5474.48 | 53    |
| H11  | 3735.17 | 8133.27  | 8229.34 | 59    |
| H12  | 2292.93 | 8046.48  | 7138.44 | 67    |
| H14A | 7108.47 | 9258.54  | 8201.72 | 59    |
| H14B | 6887.09 | 7238.02  | 8411.89 | 59    |
| H15A | 6512.83 | 10295.5  | 9482.78 | 67    |
| H15B | 6608.59 | 8295.48  | 9942.84 | 67    |
| H16B | 5185.61 | 7730.4   | 9174.15 | 62    |
| H16A | 5077.9  | 9849.9   | 9126.47 | 62    |

## 9. NMR Spectra

### 9.1 NMR spectra of compound 1

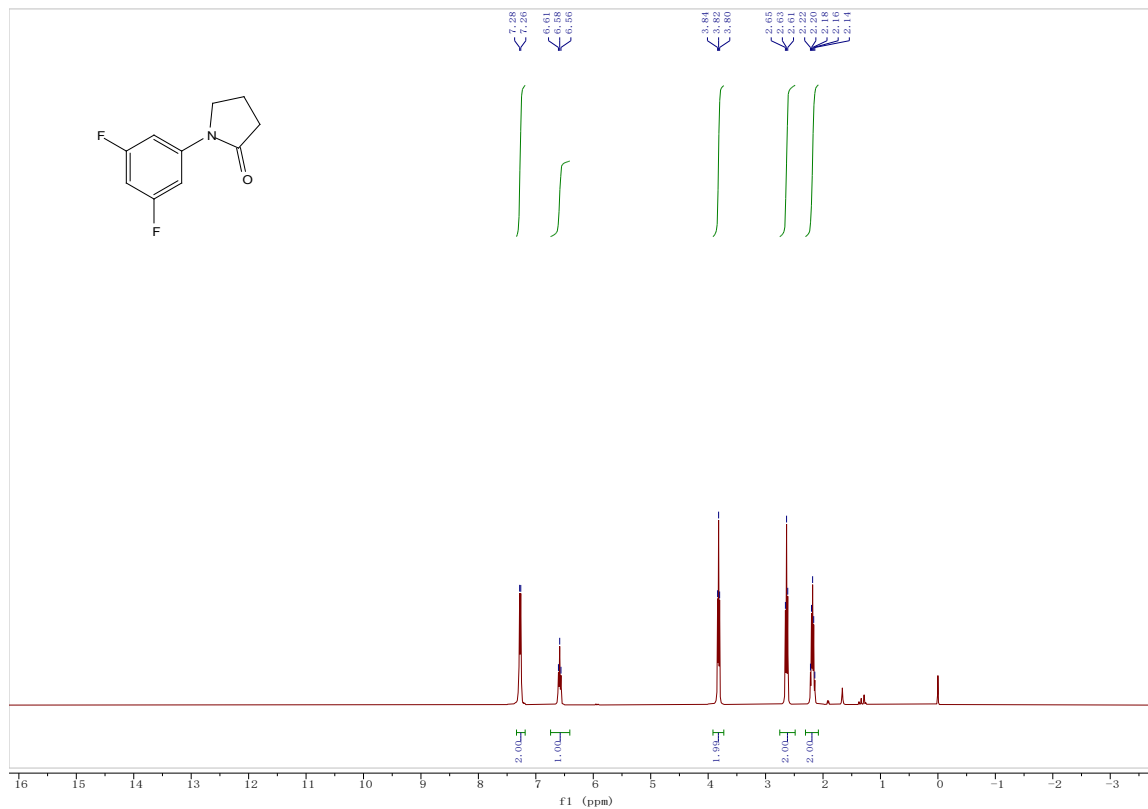

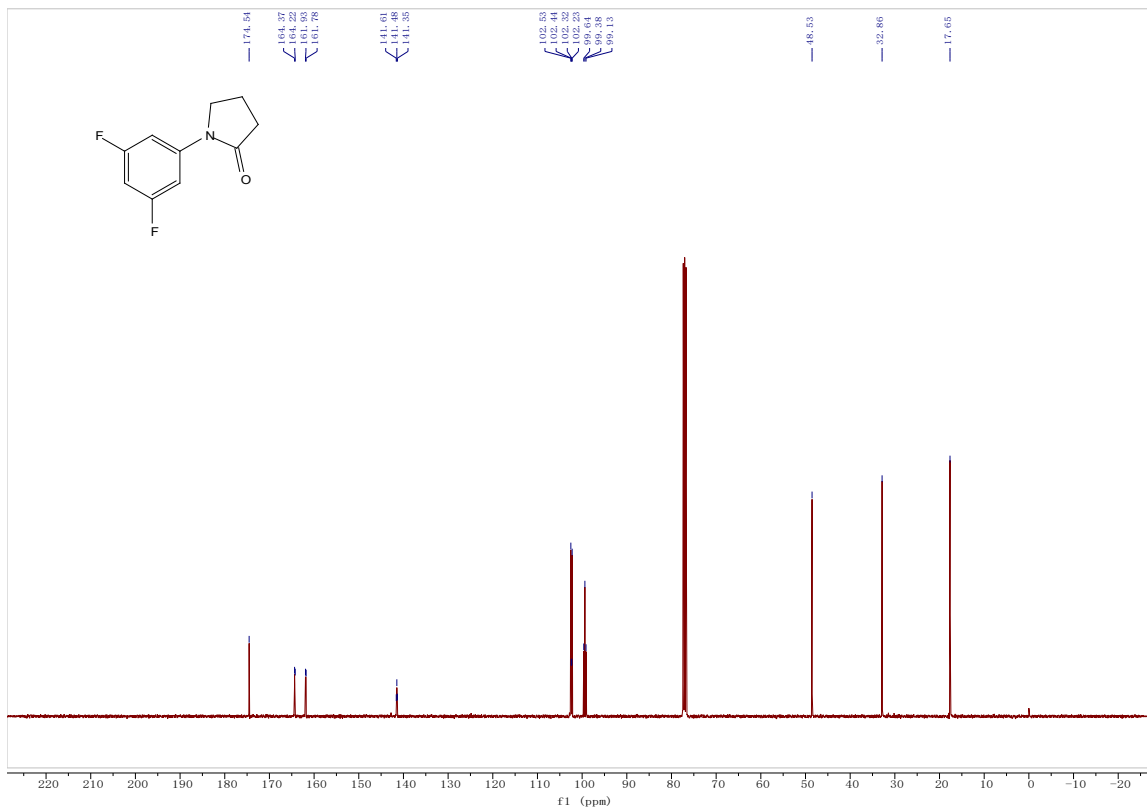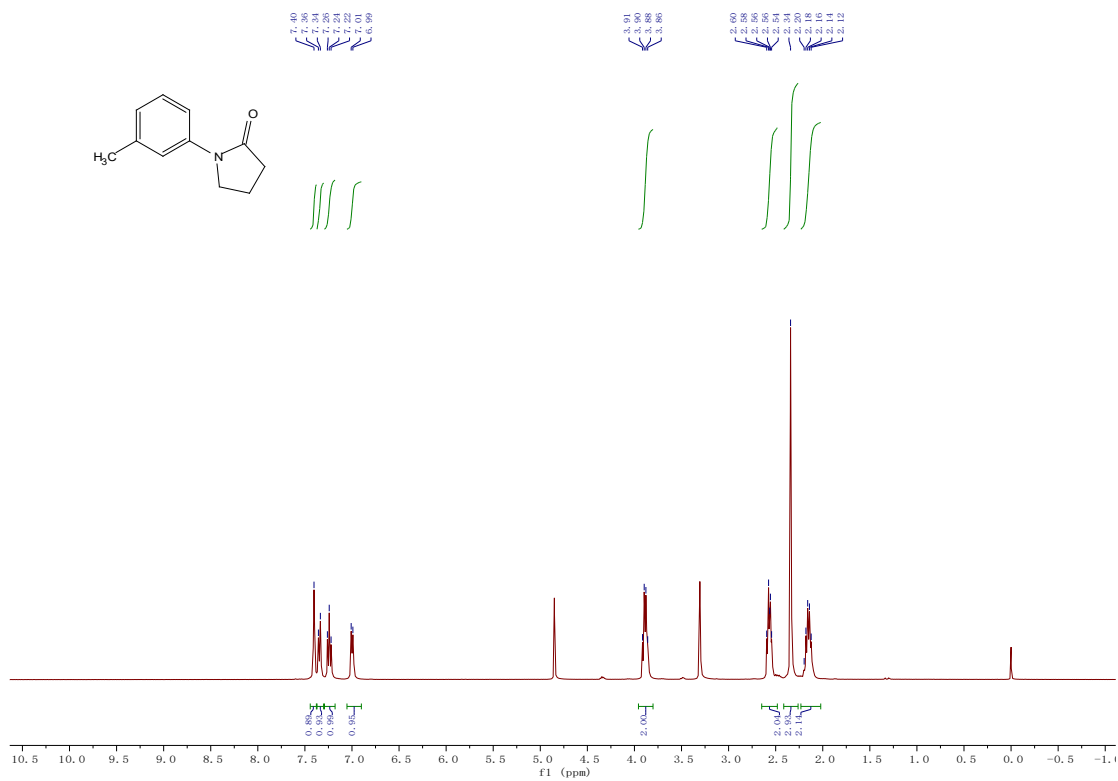

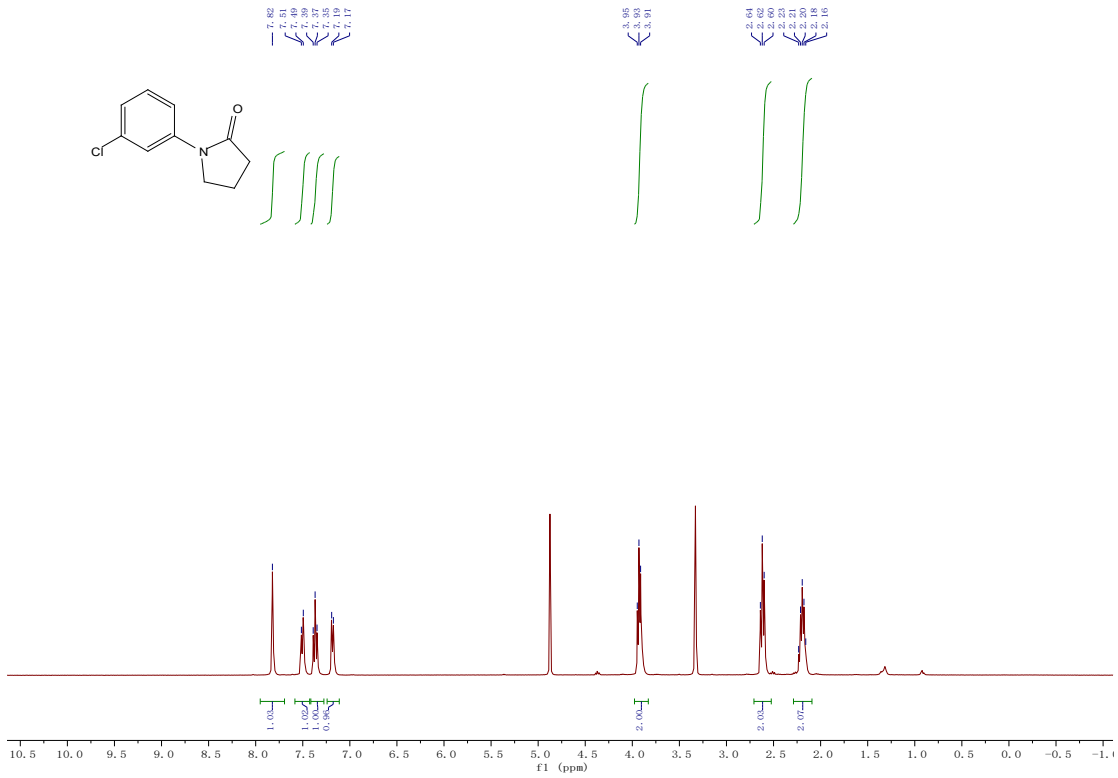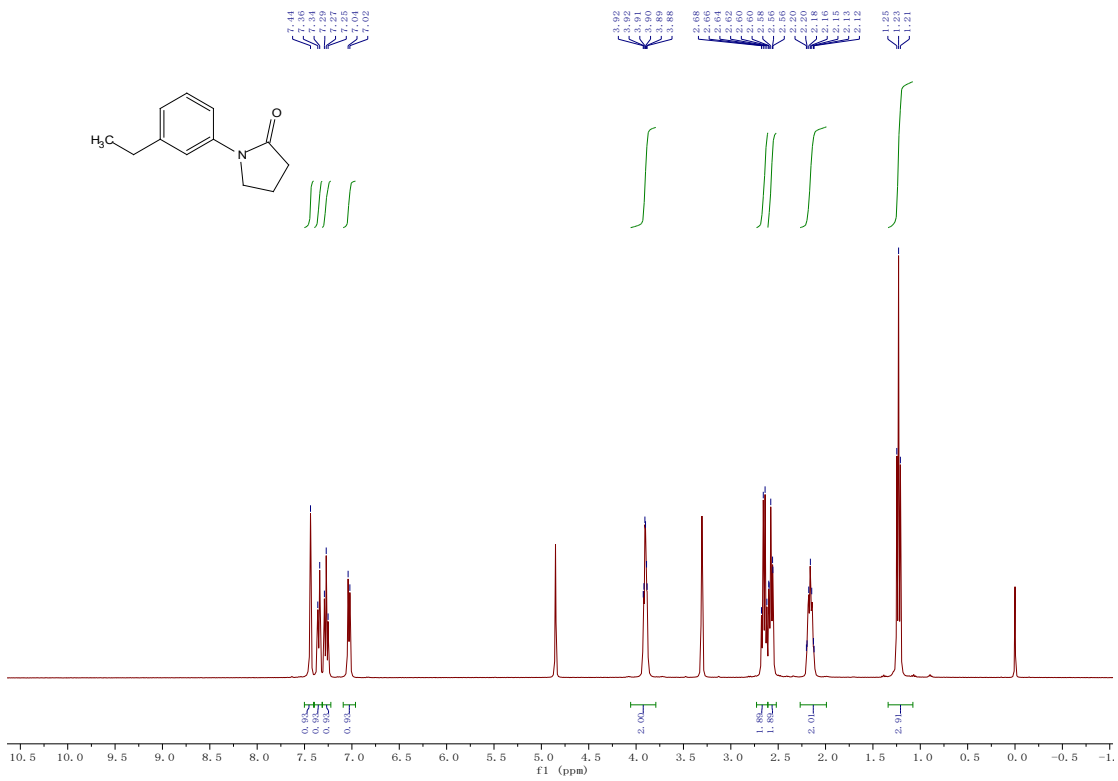

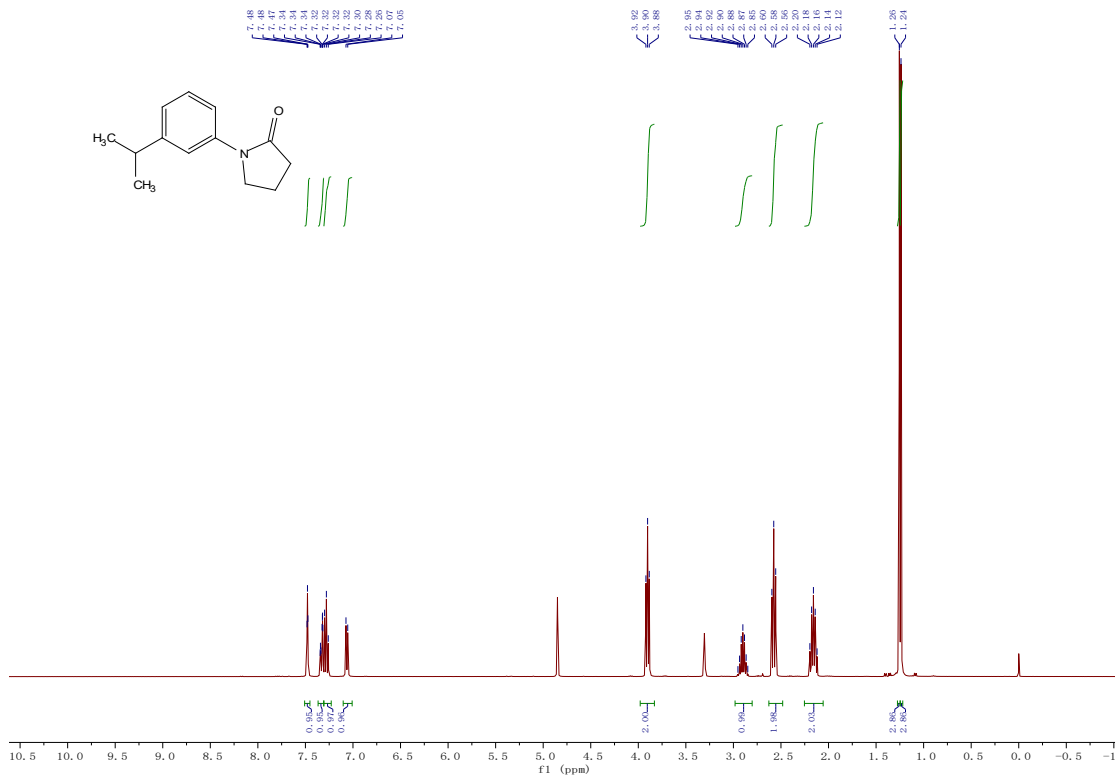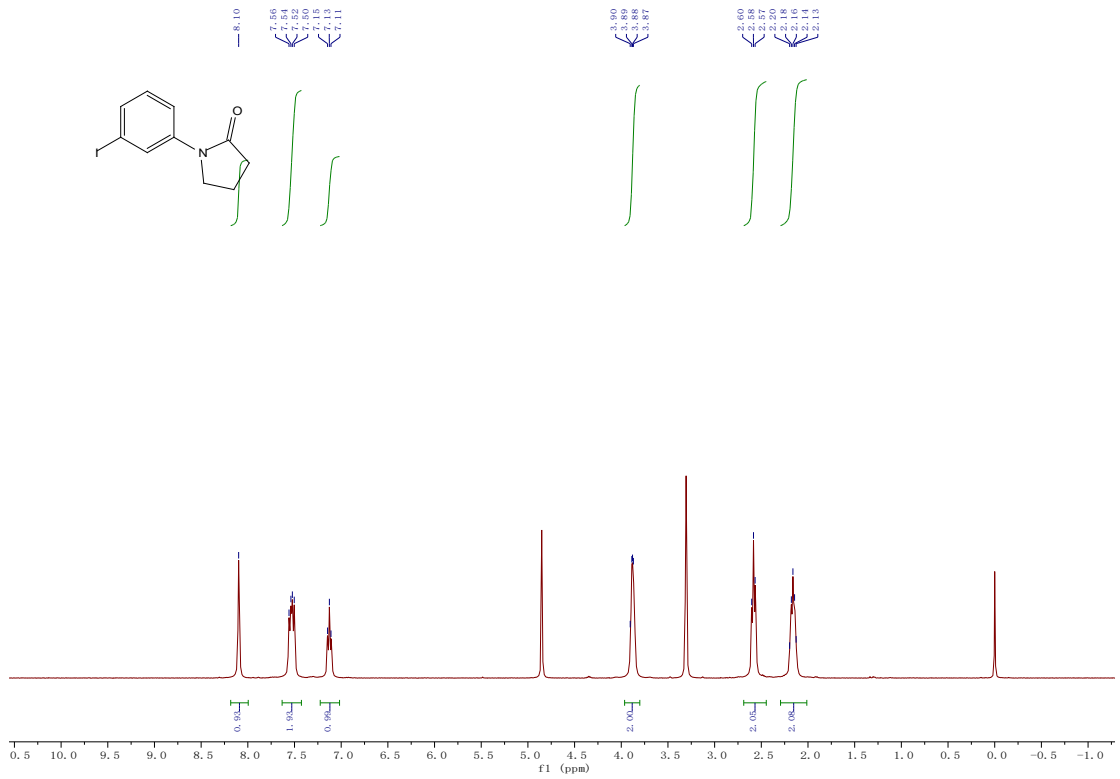

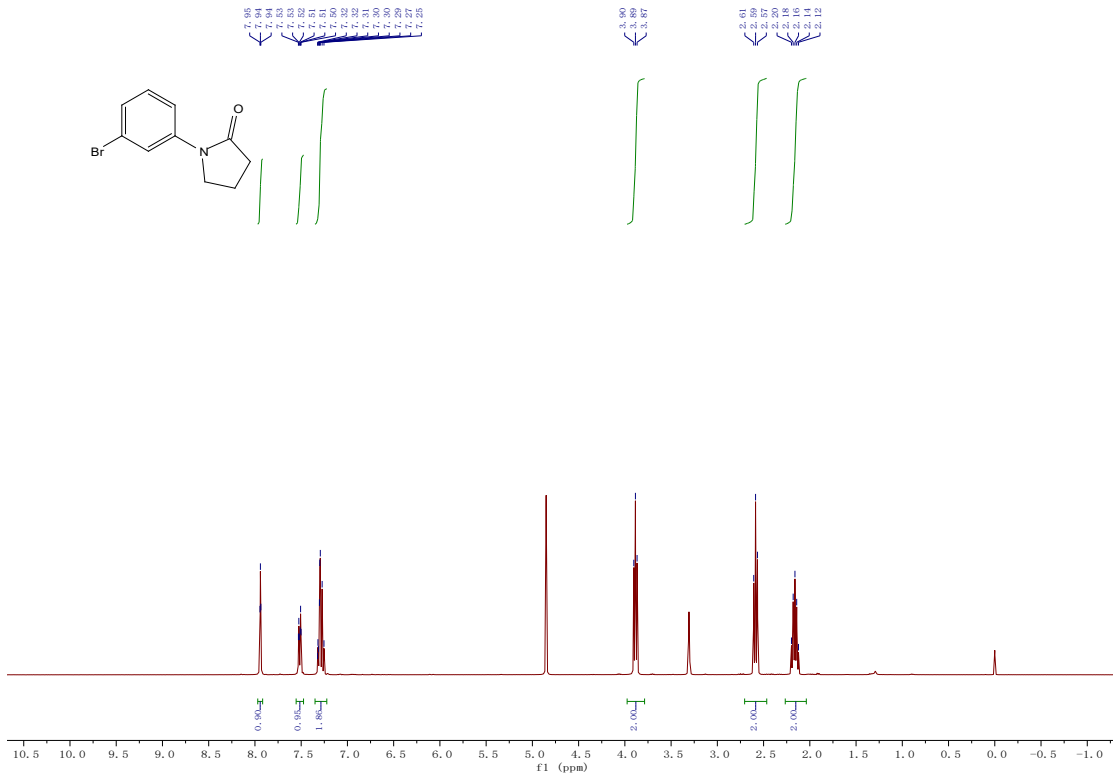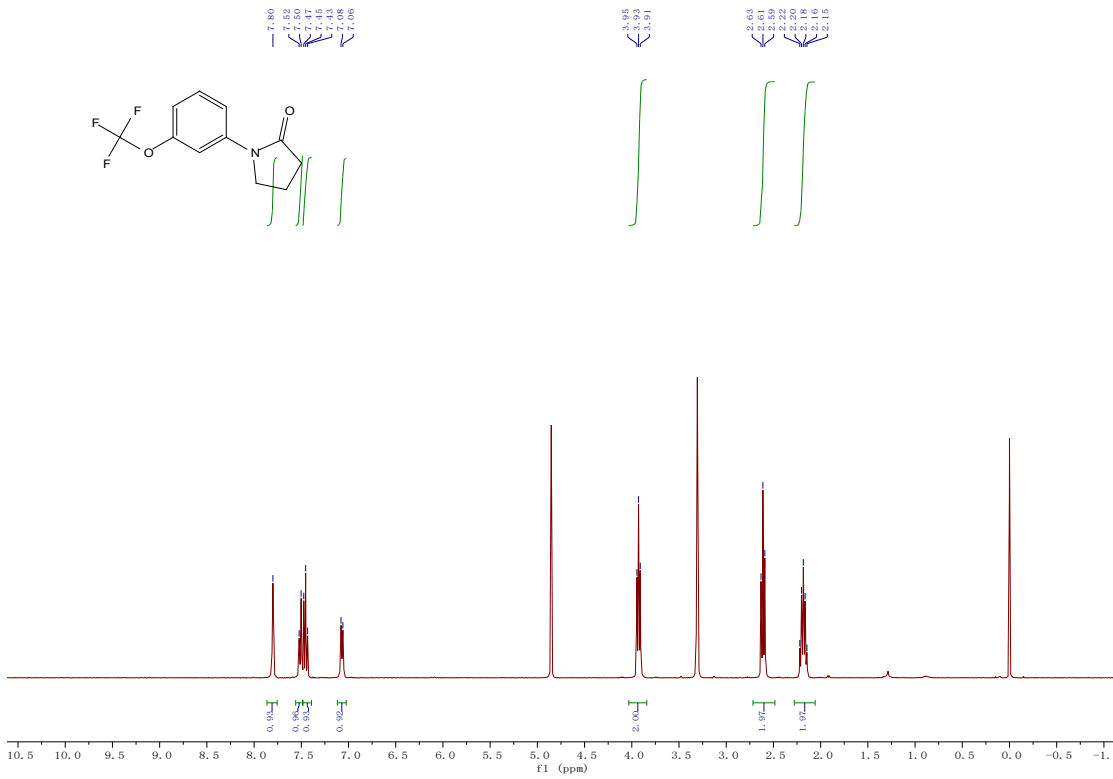

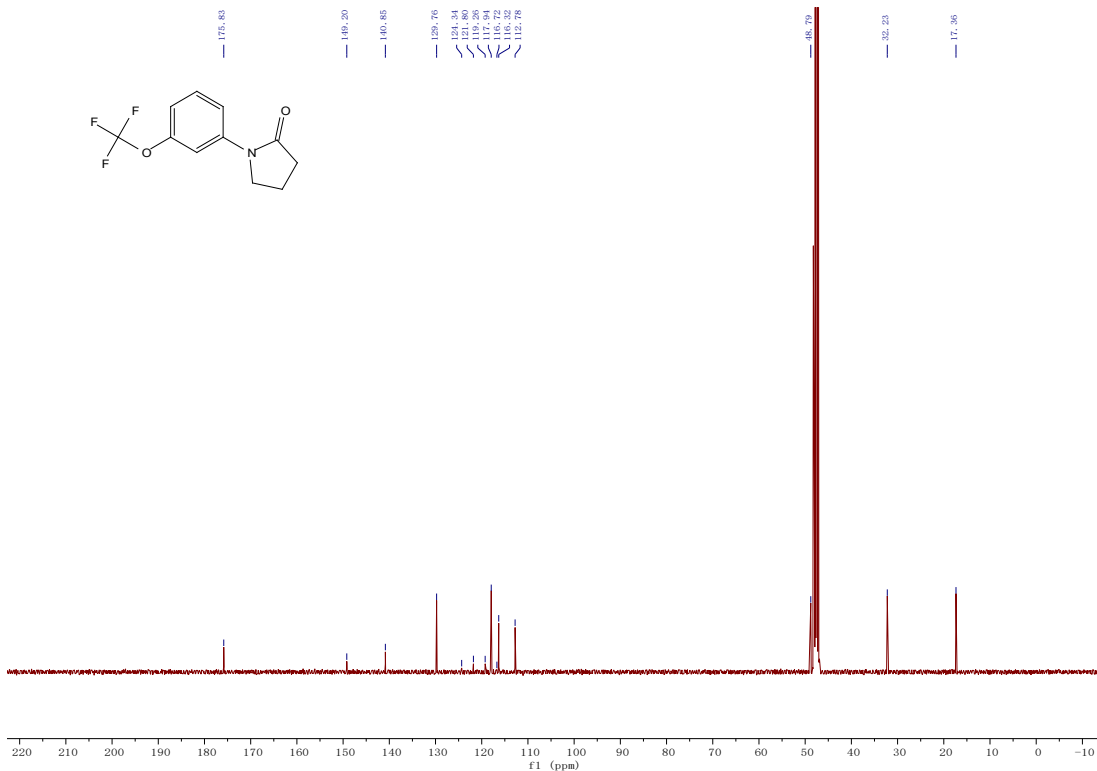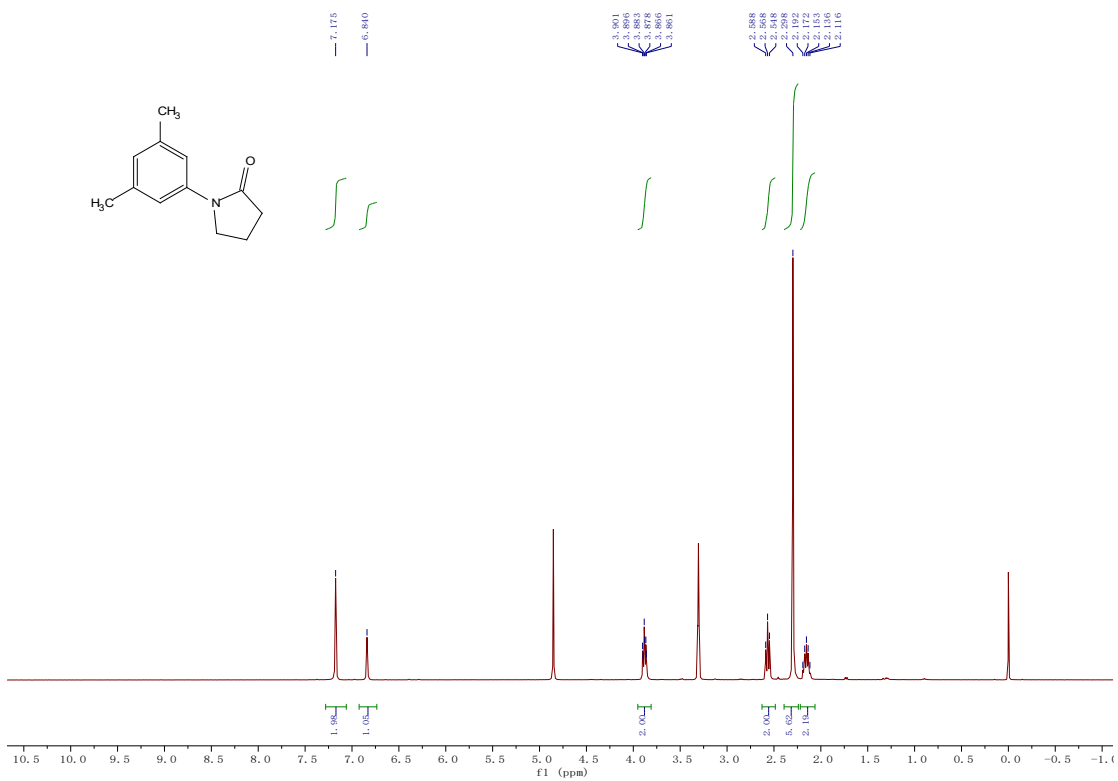

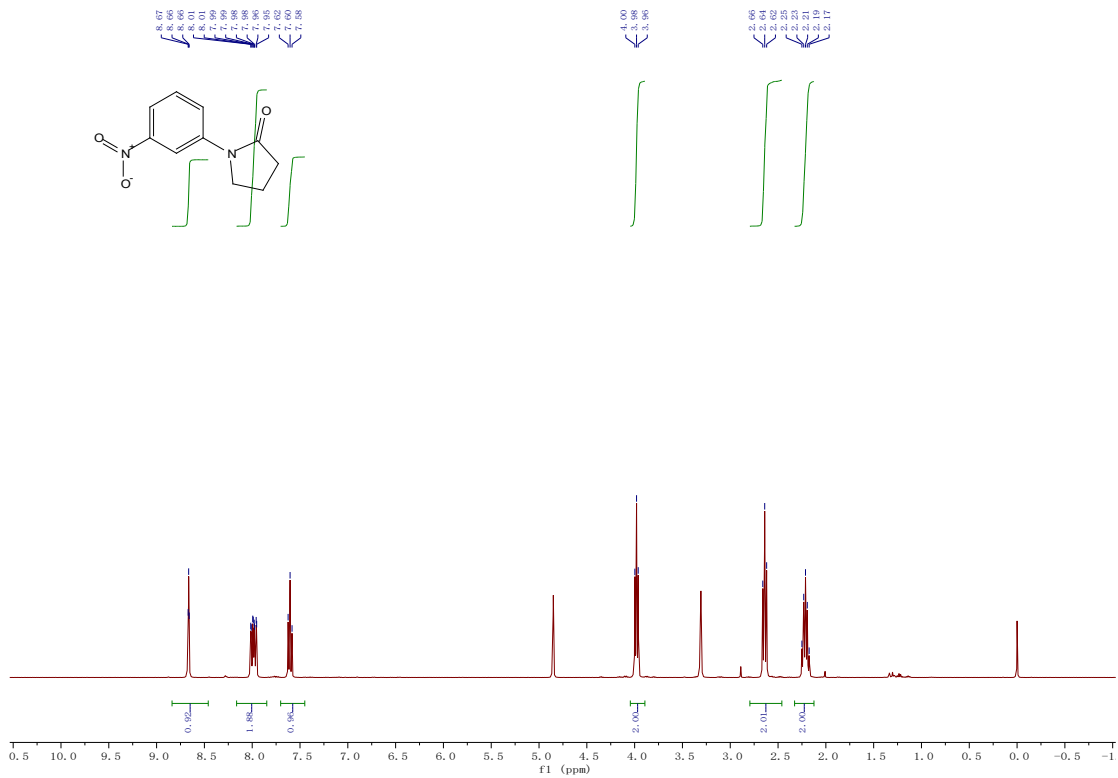

## 9.2 NMR spectra of compound 3

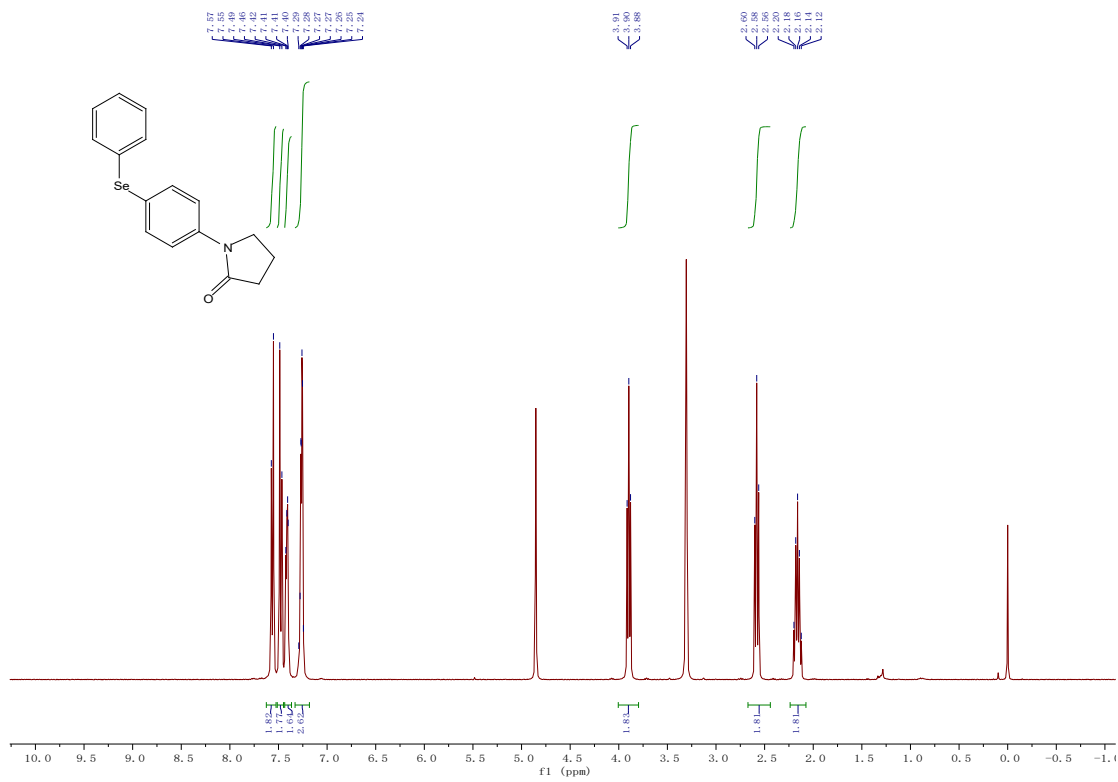



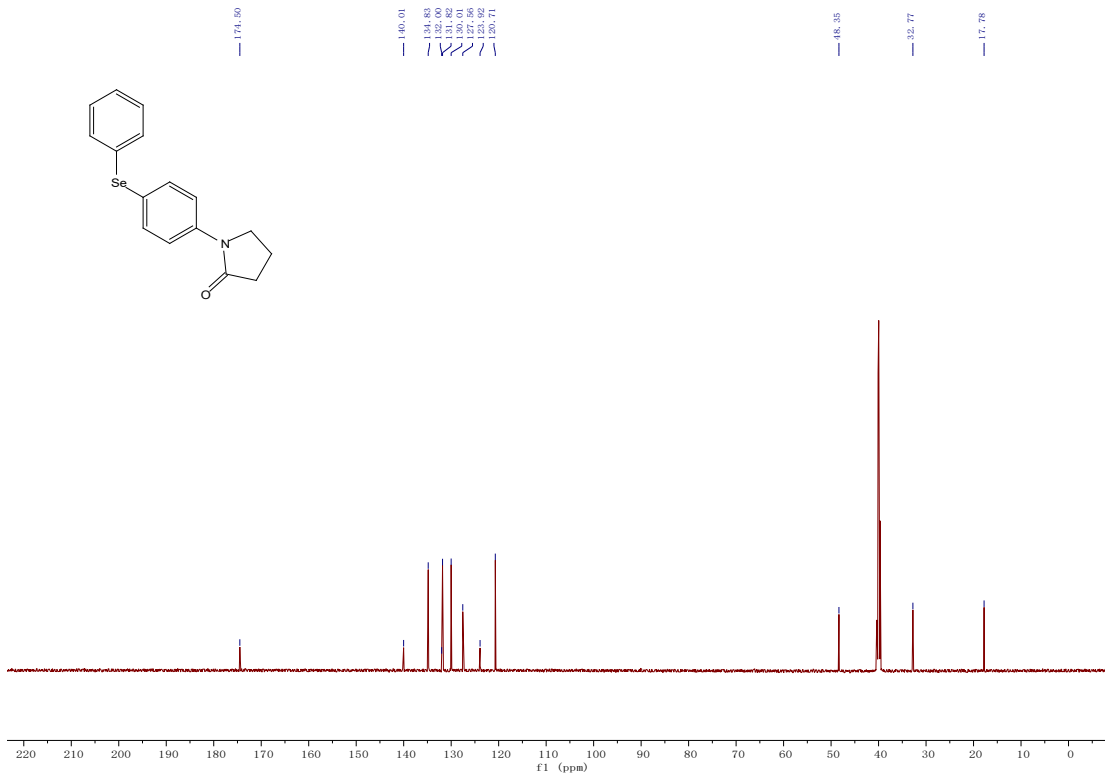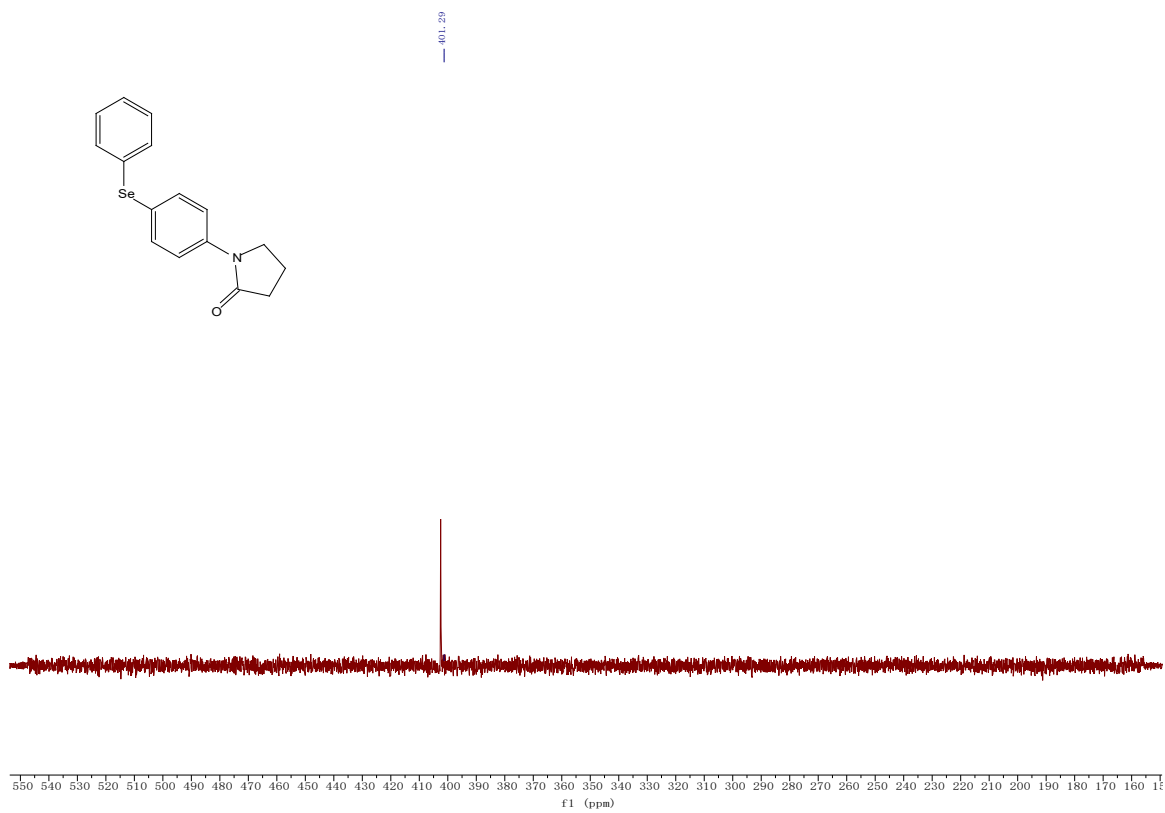

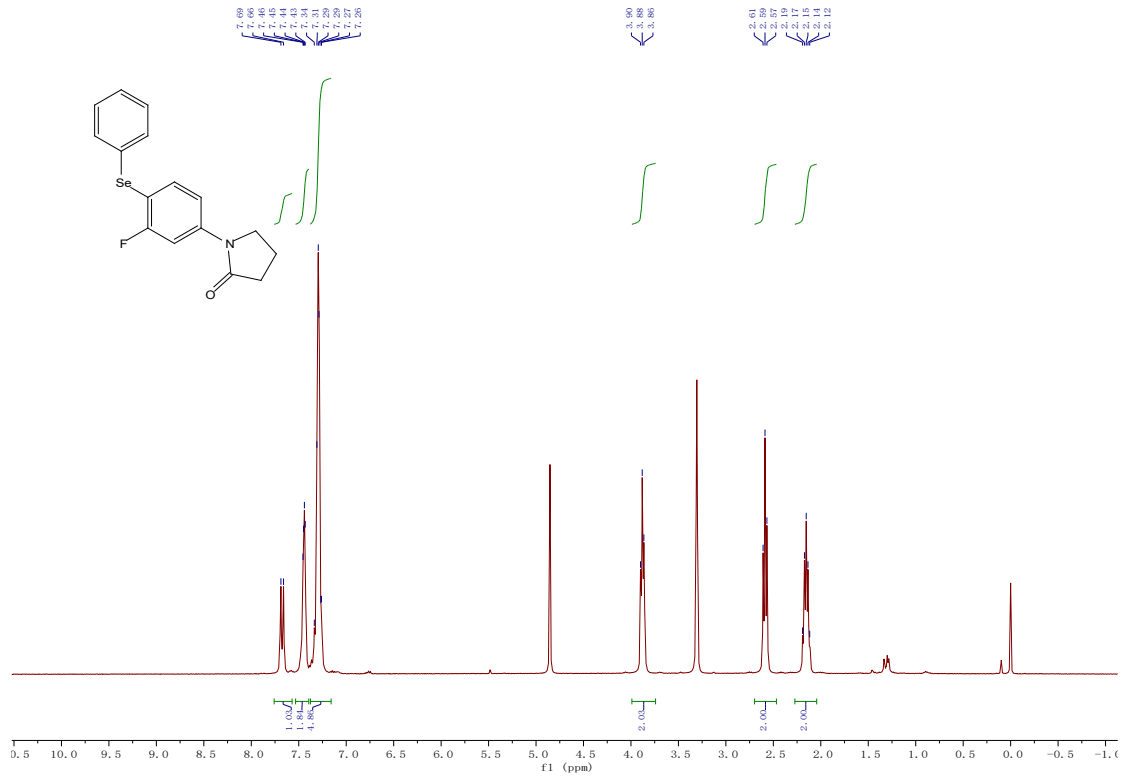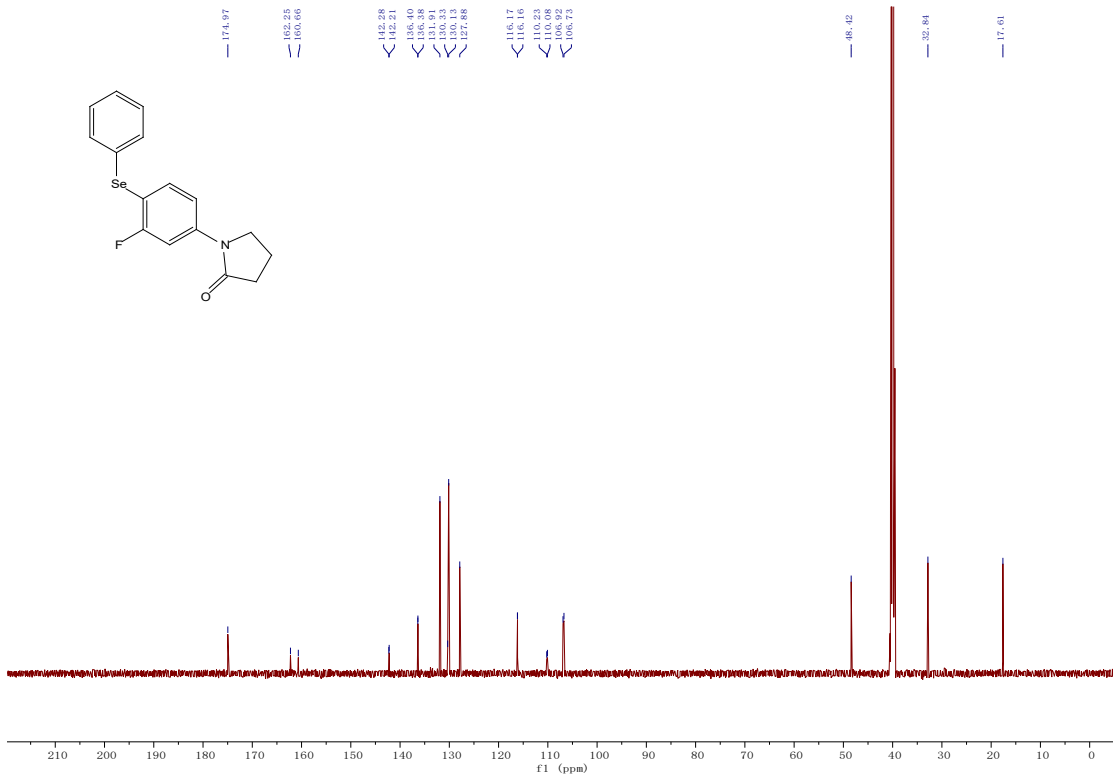

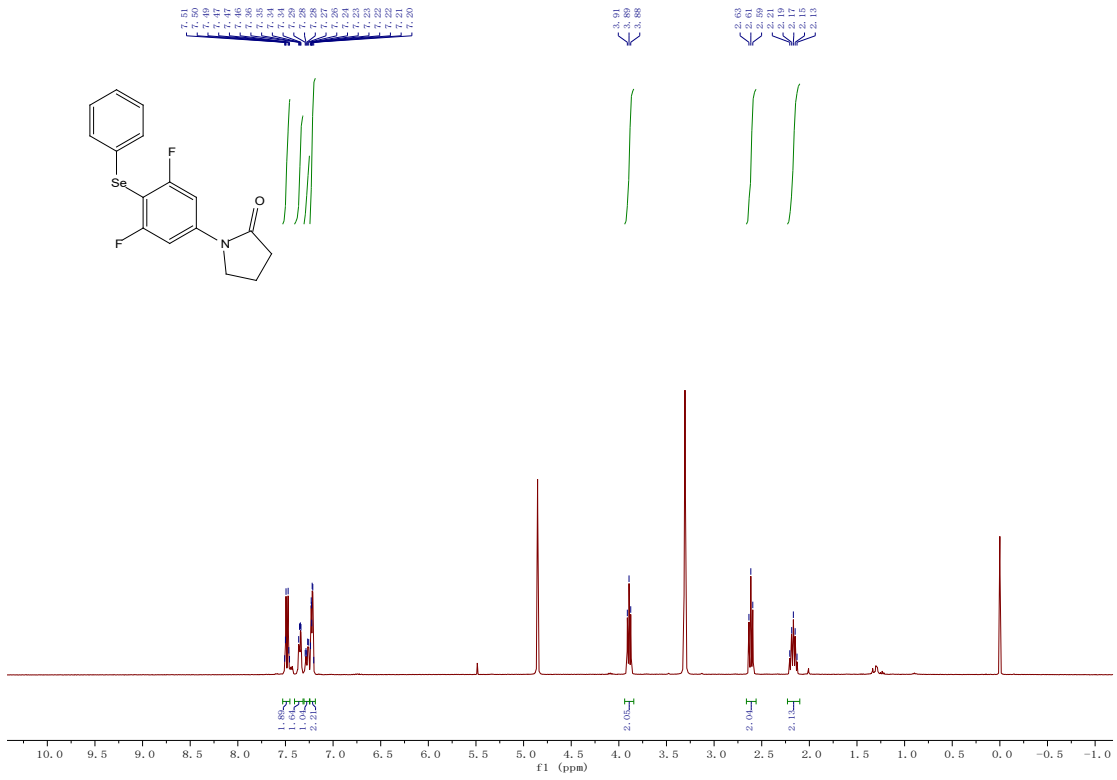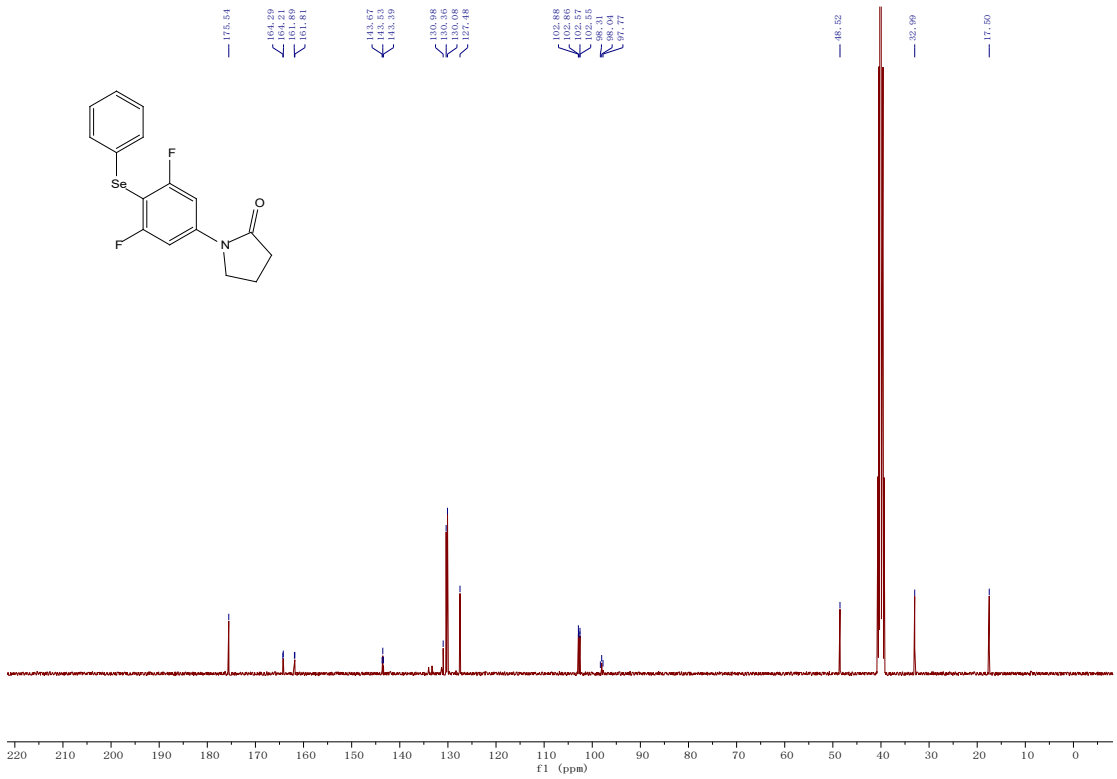

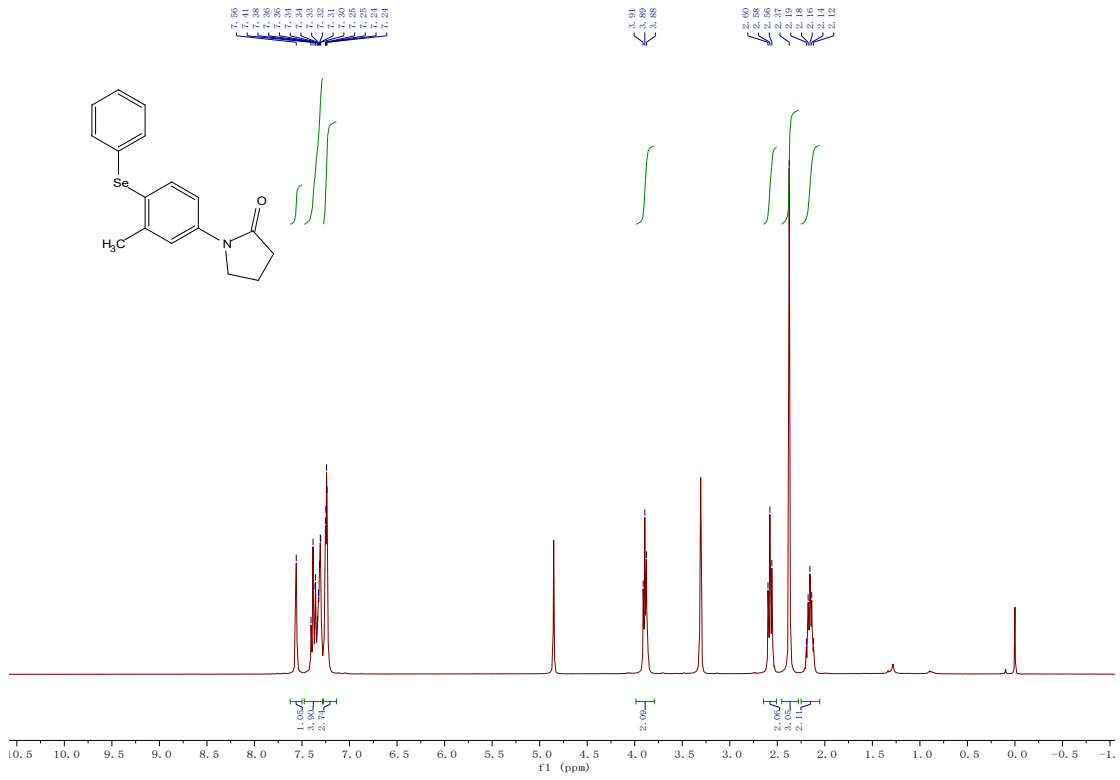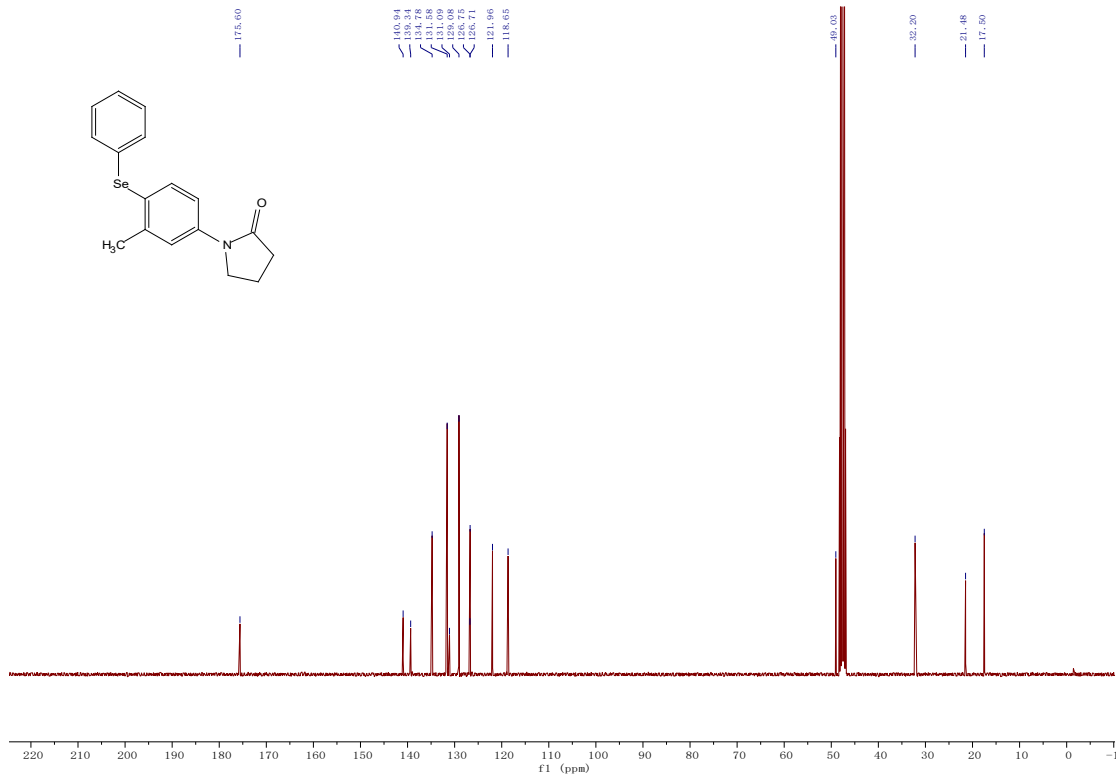

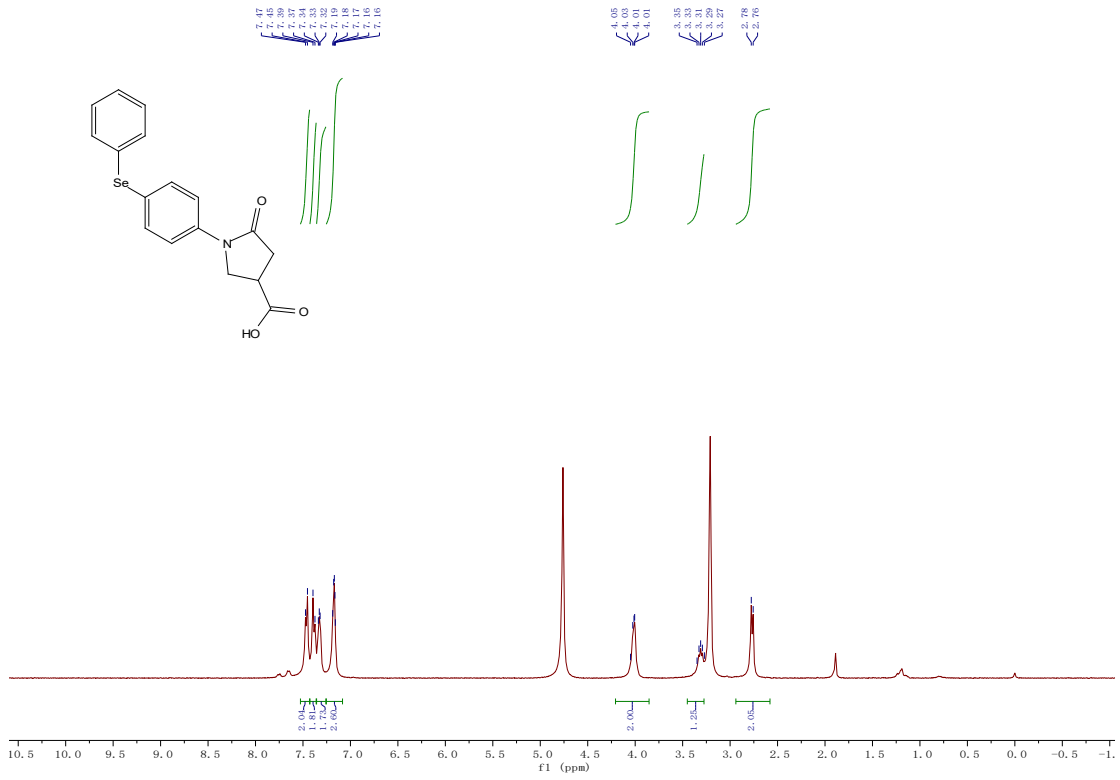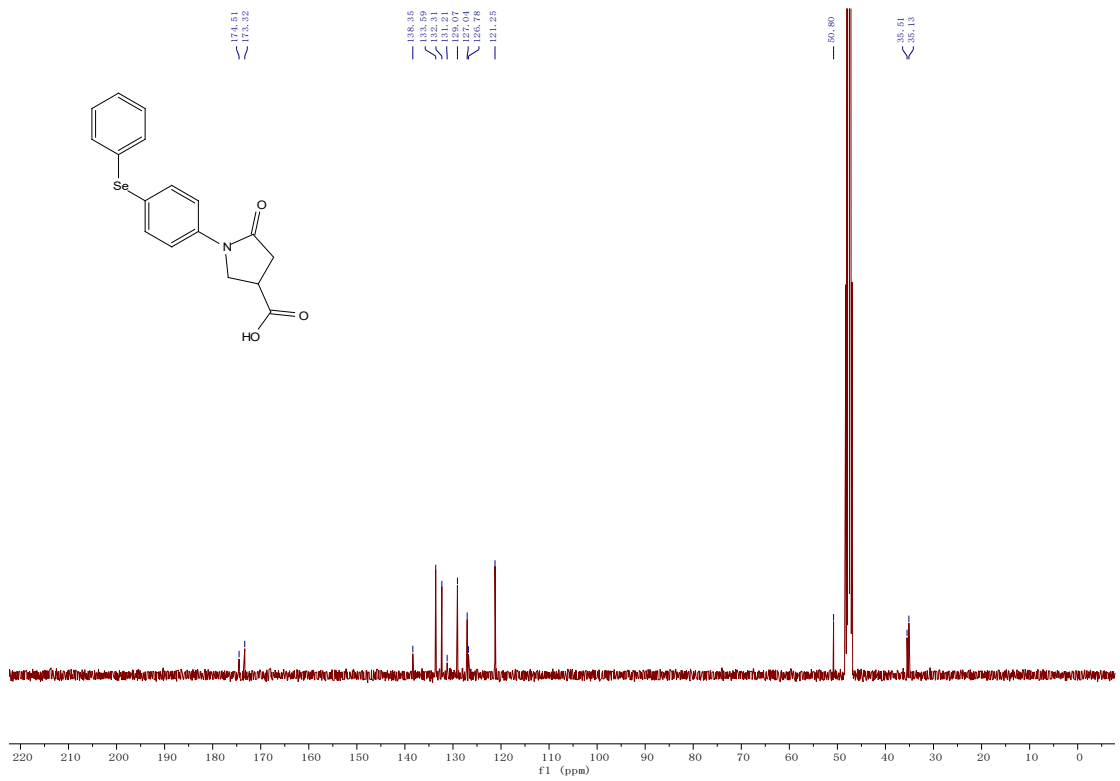

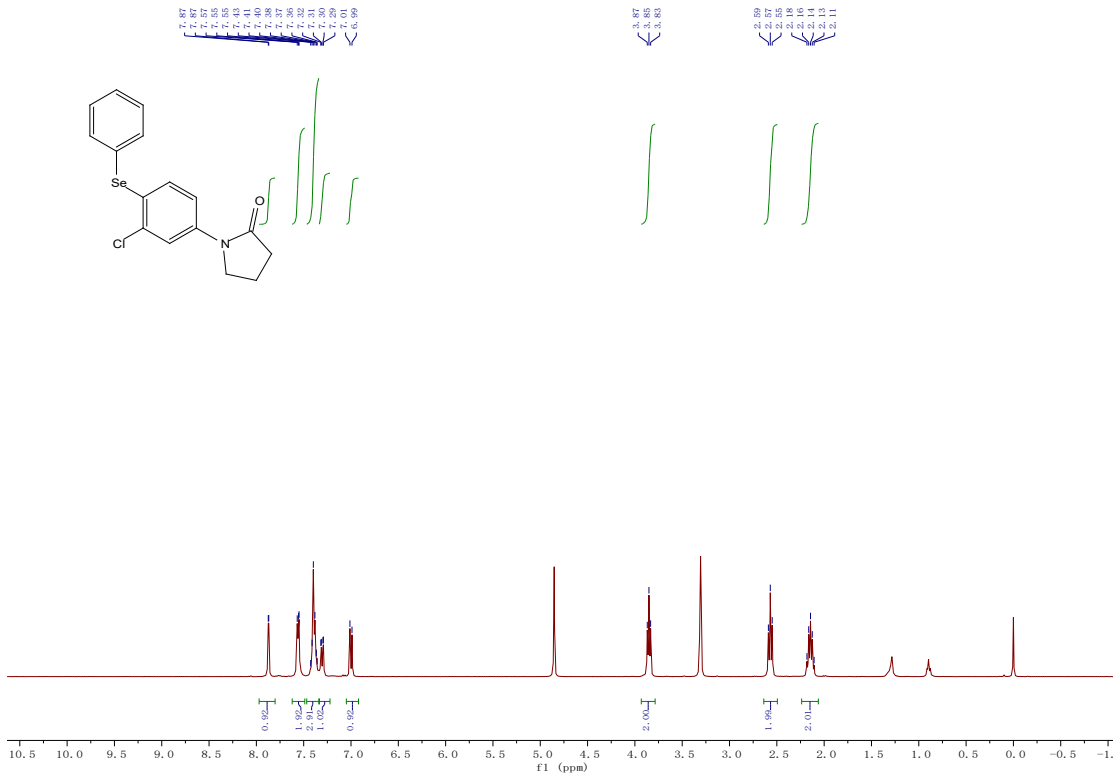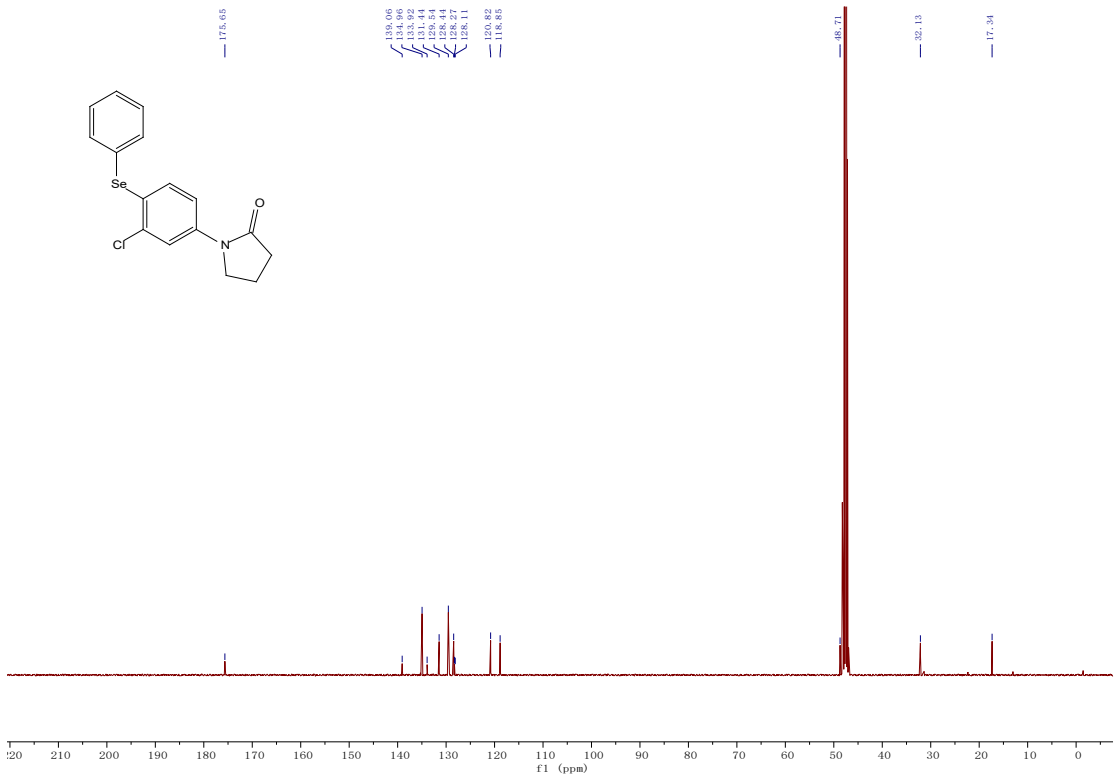



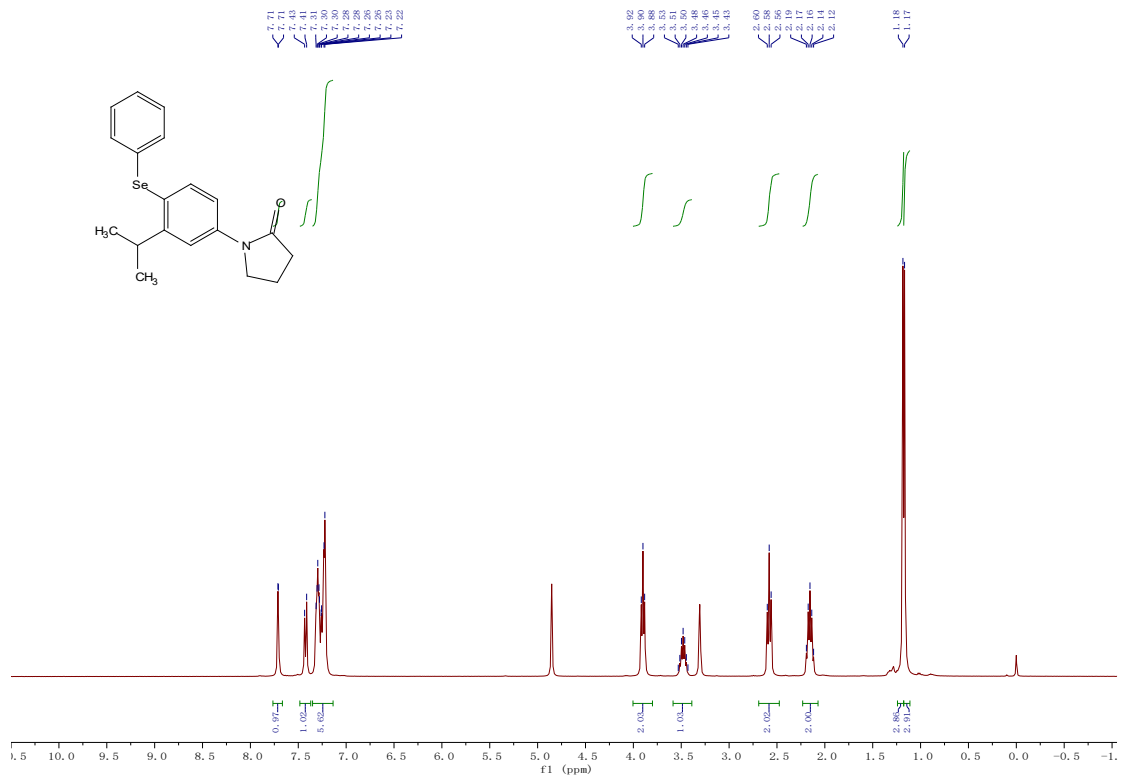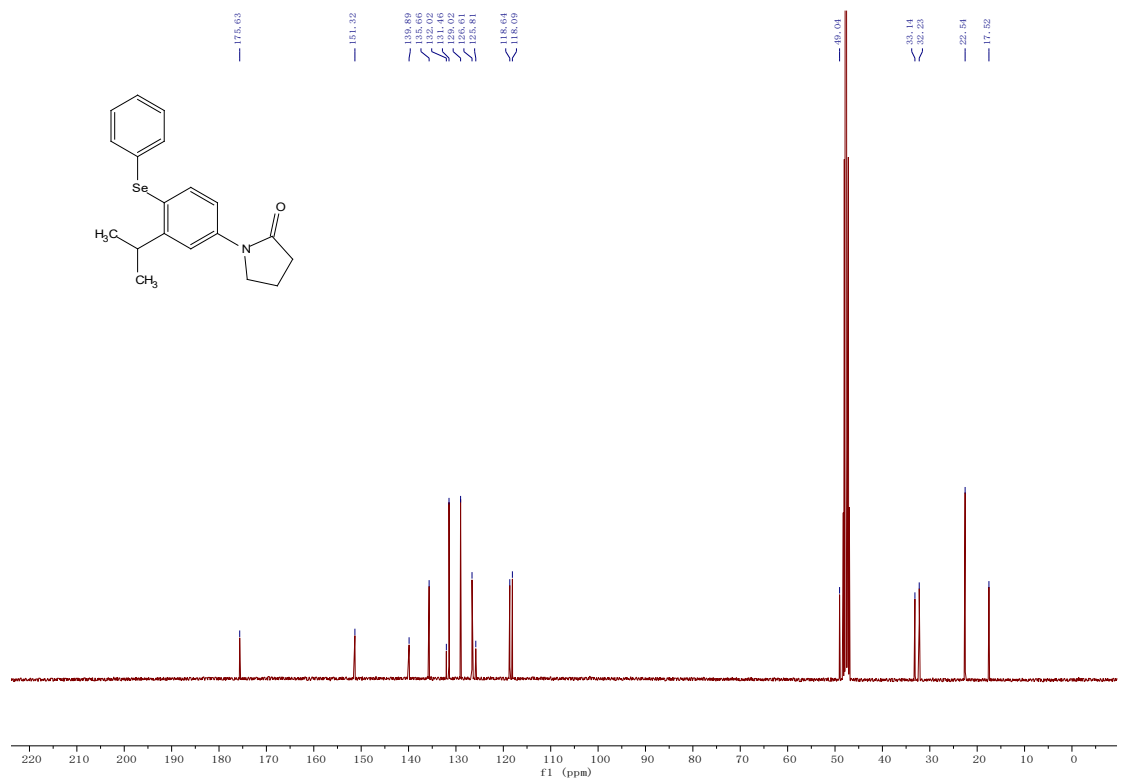



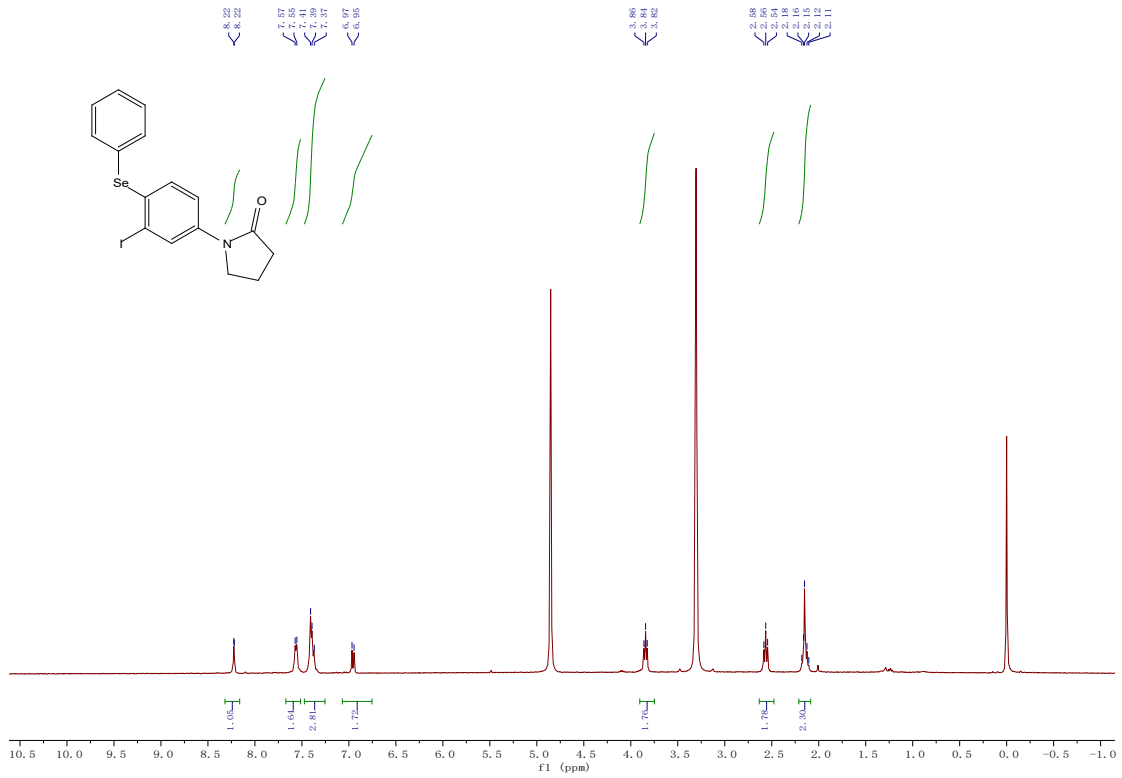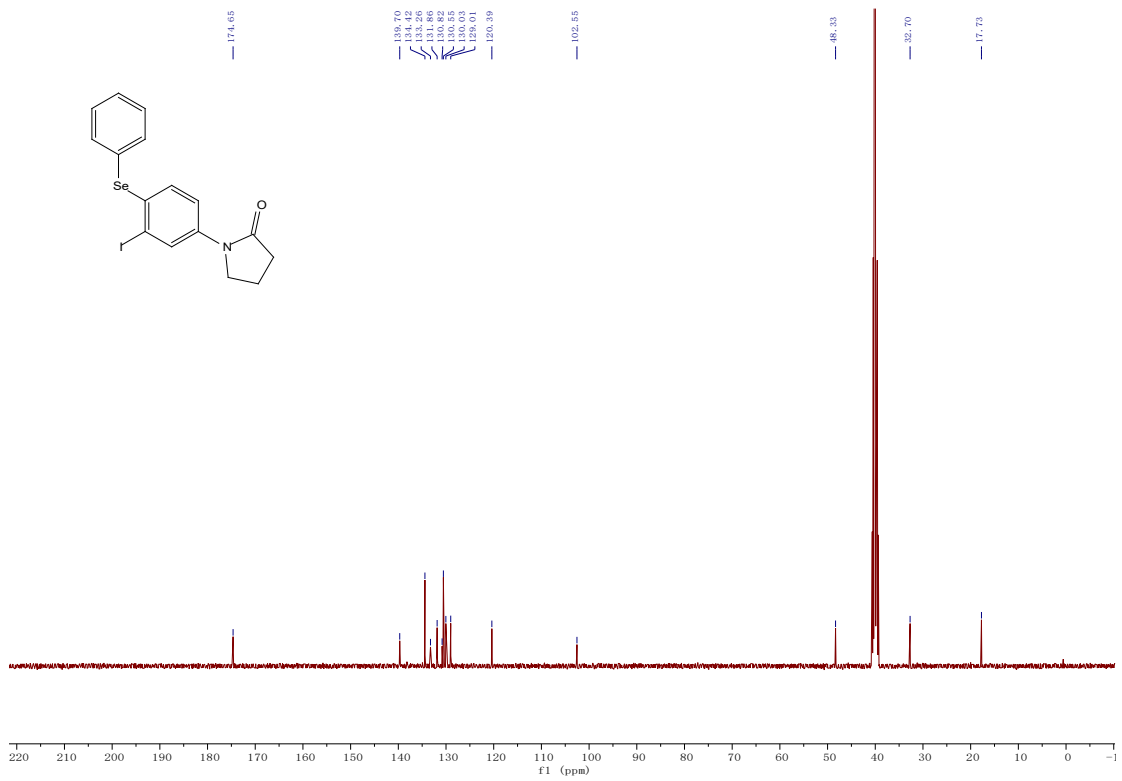

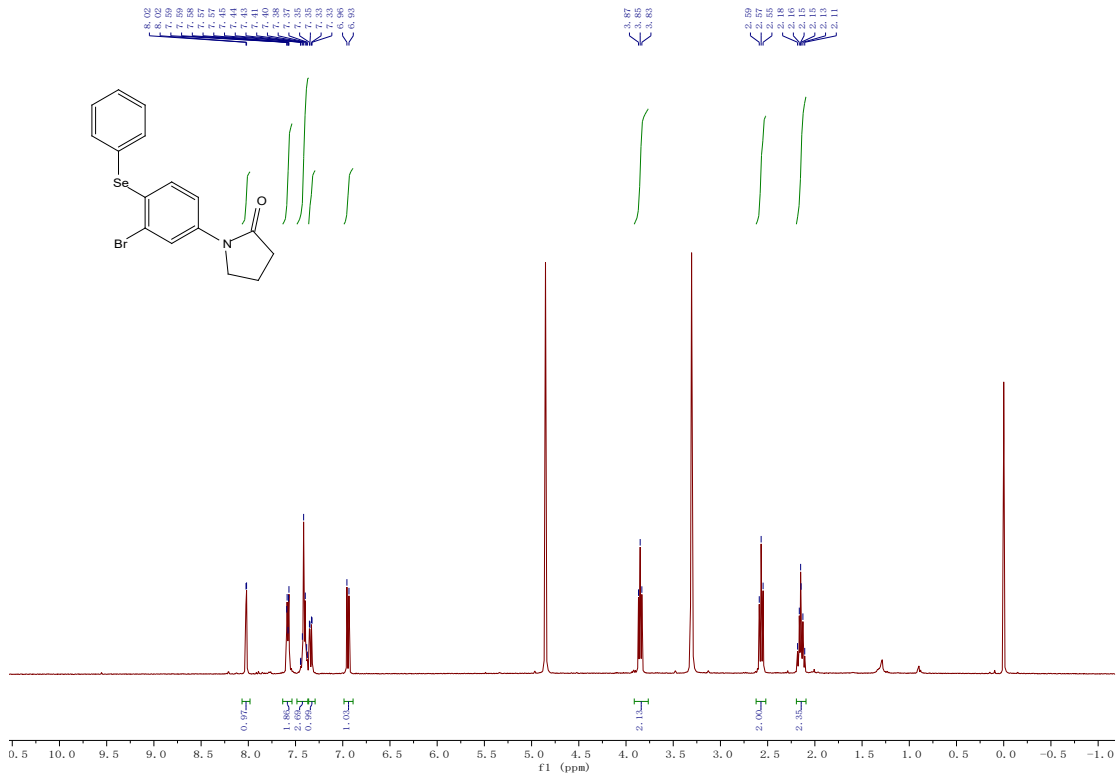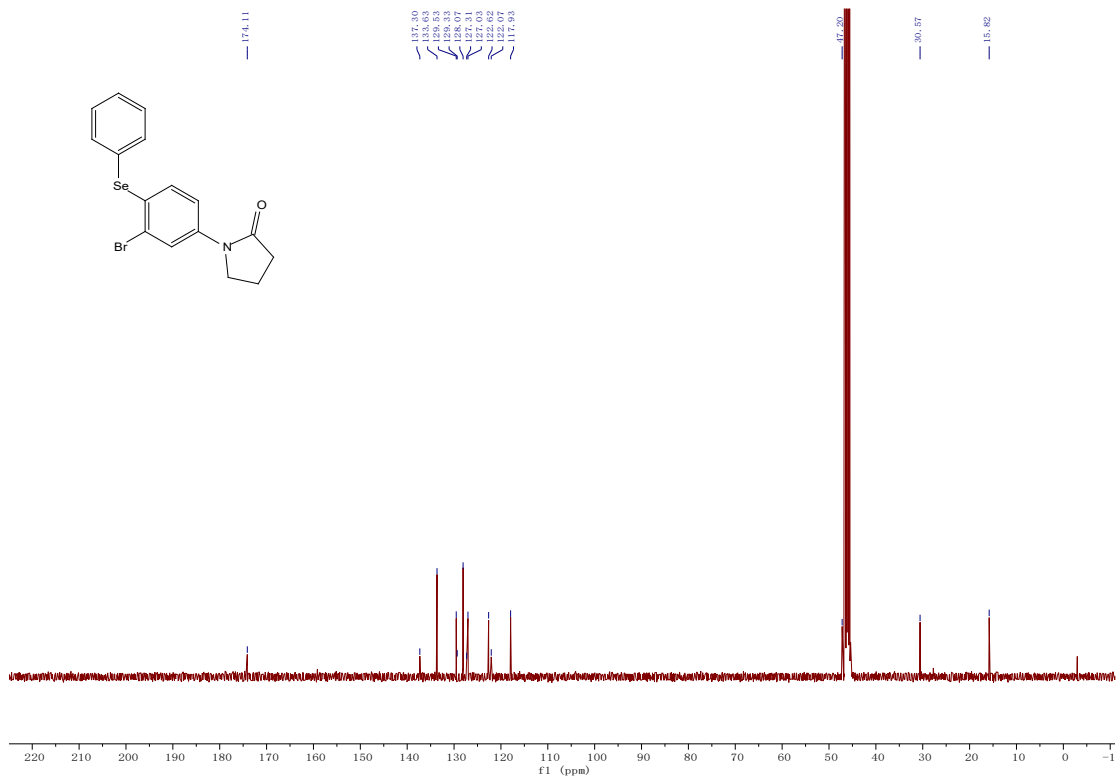



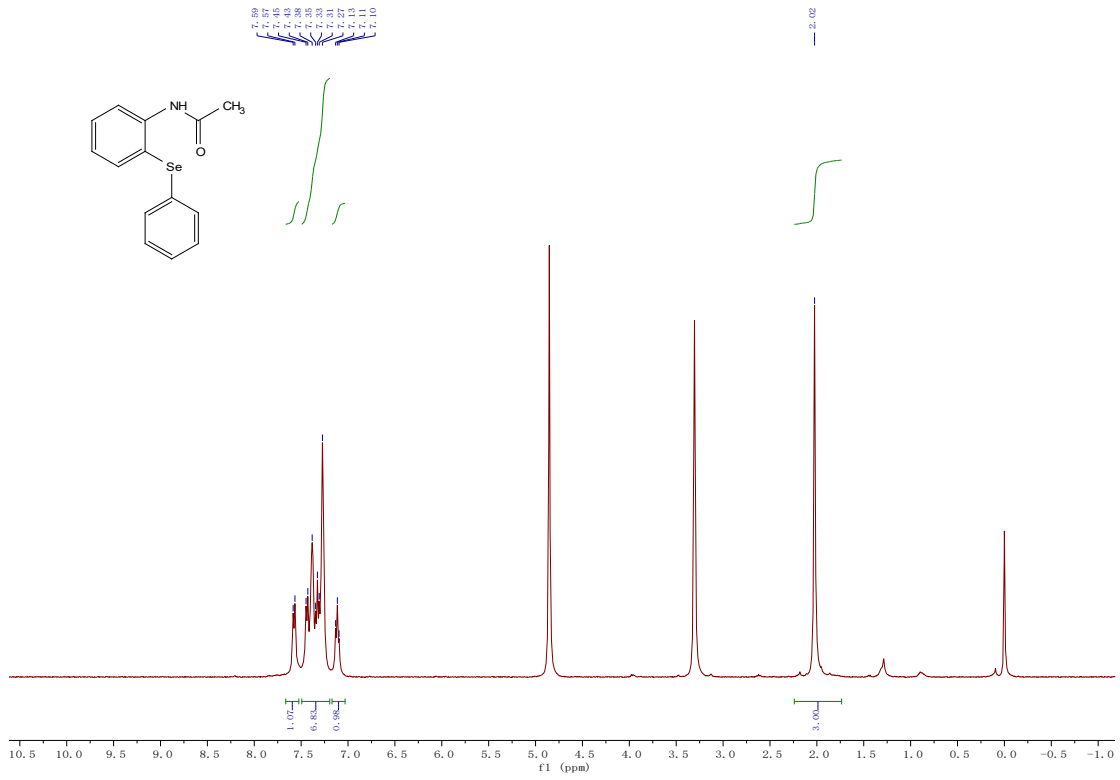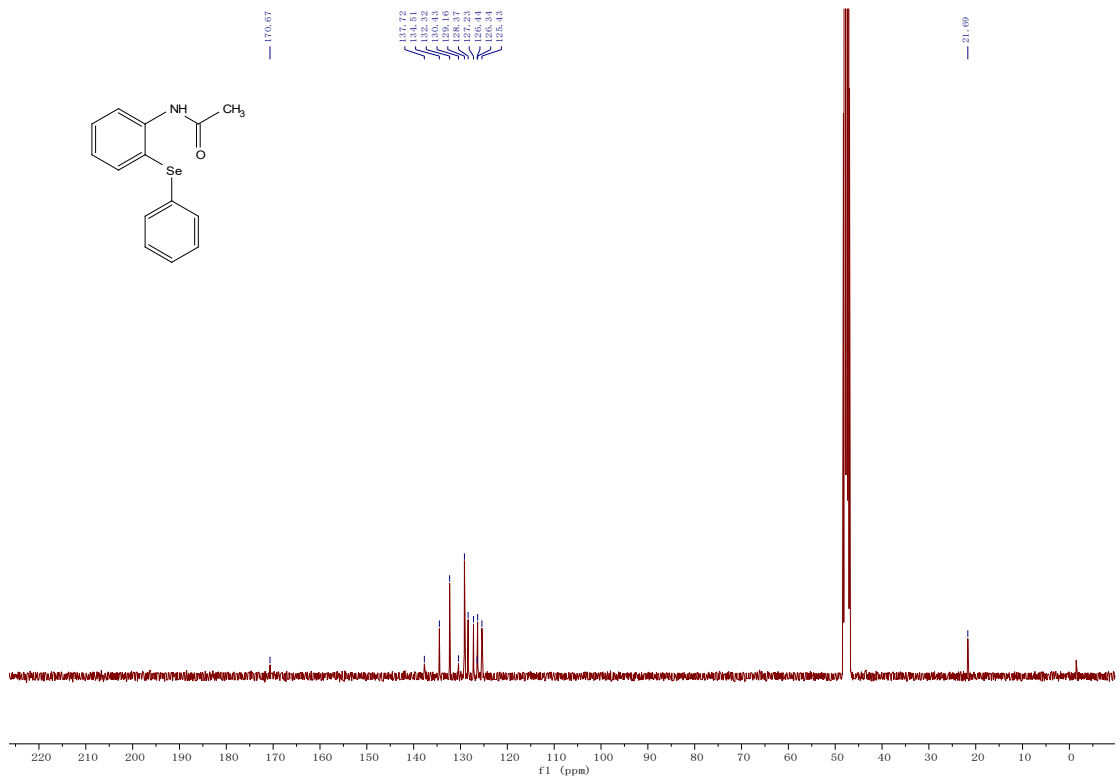

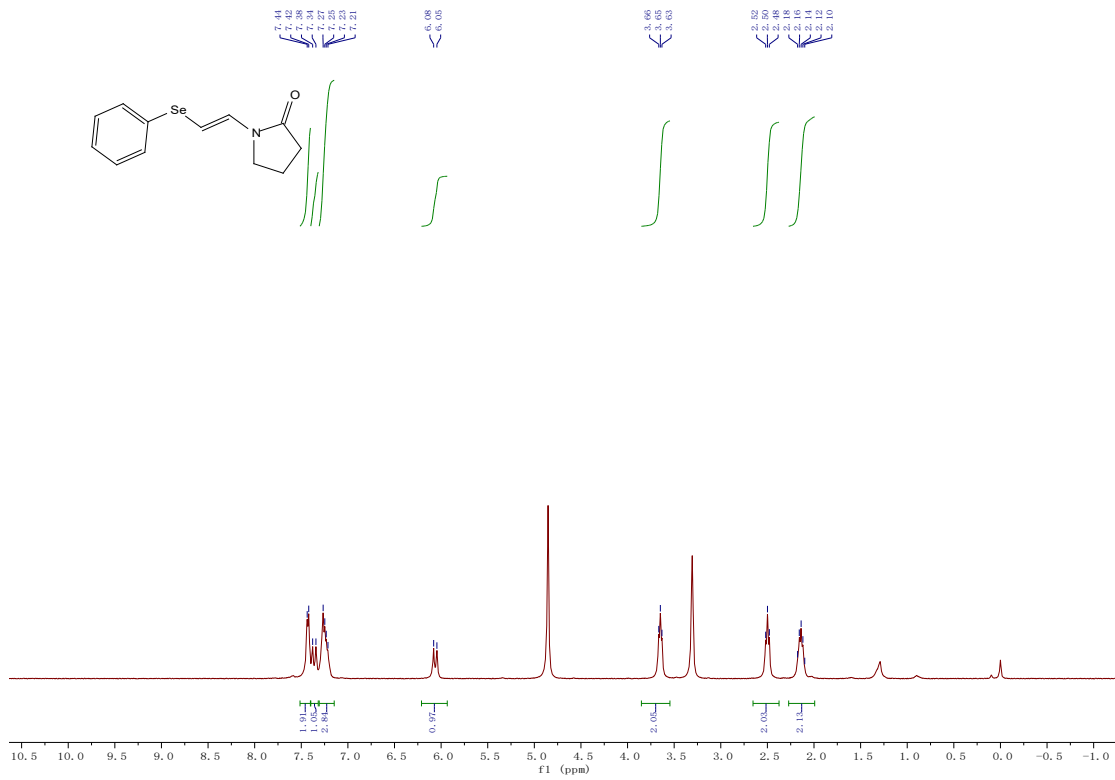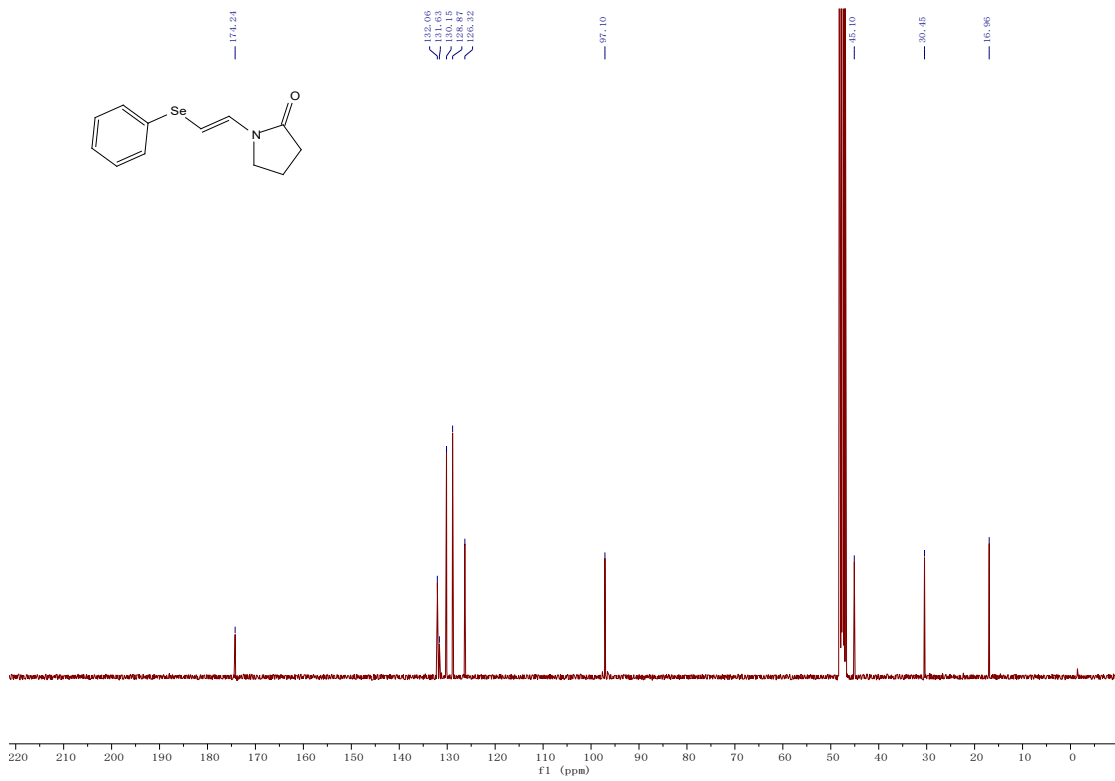

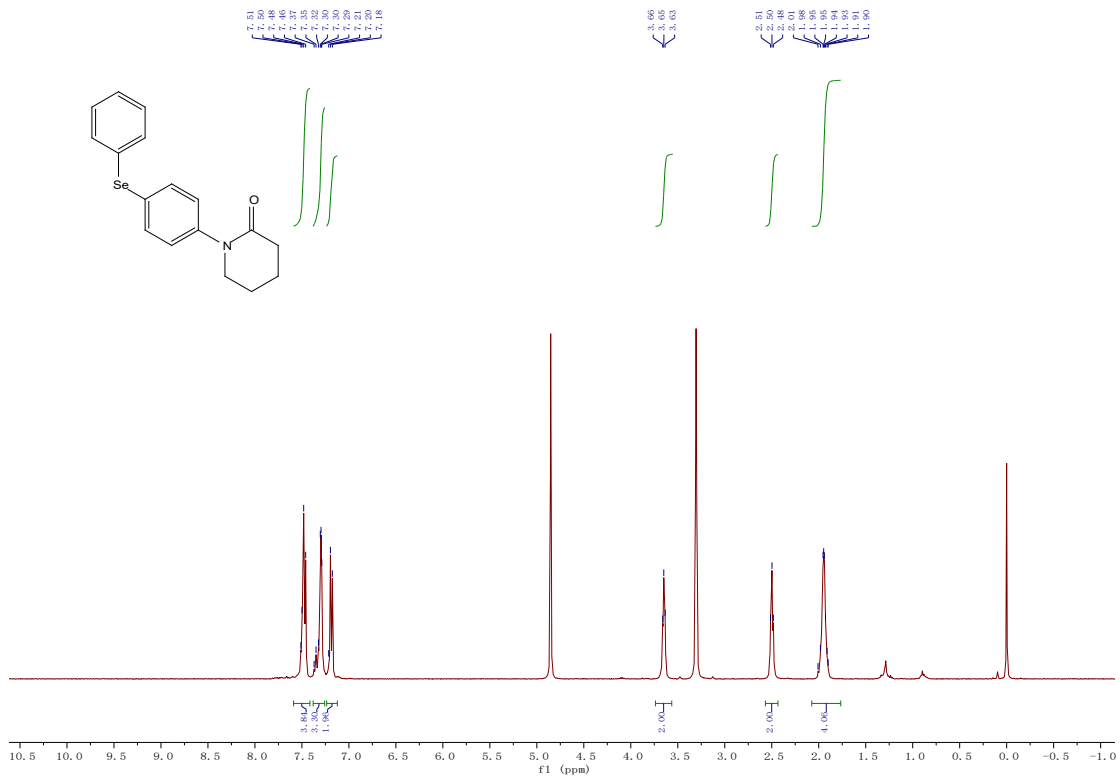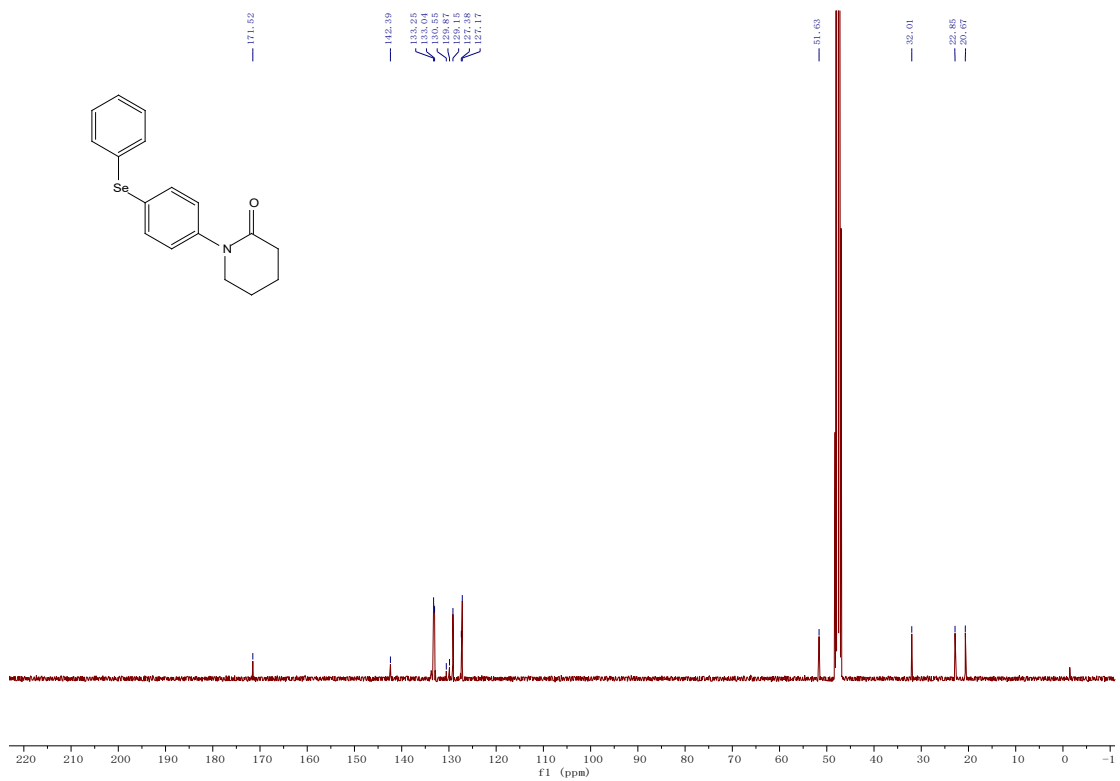

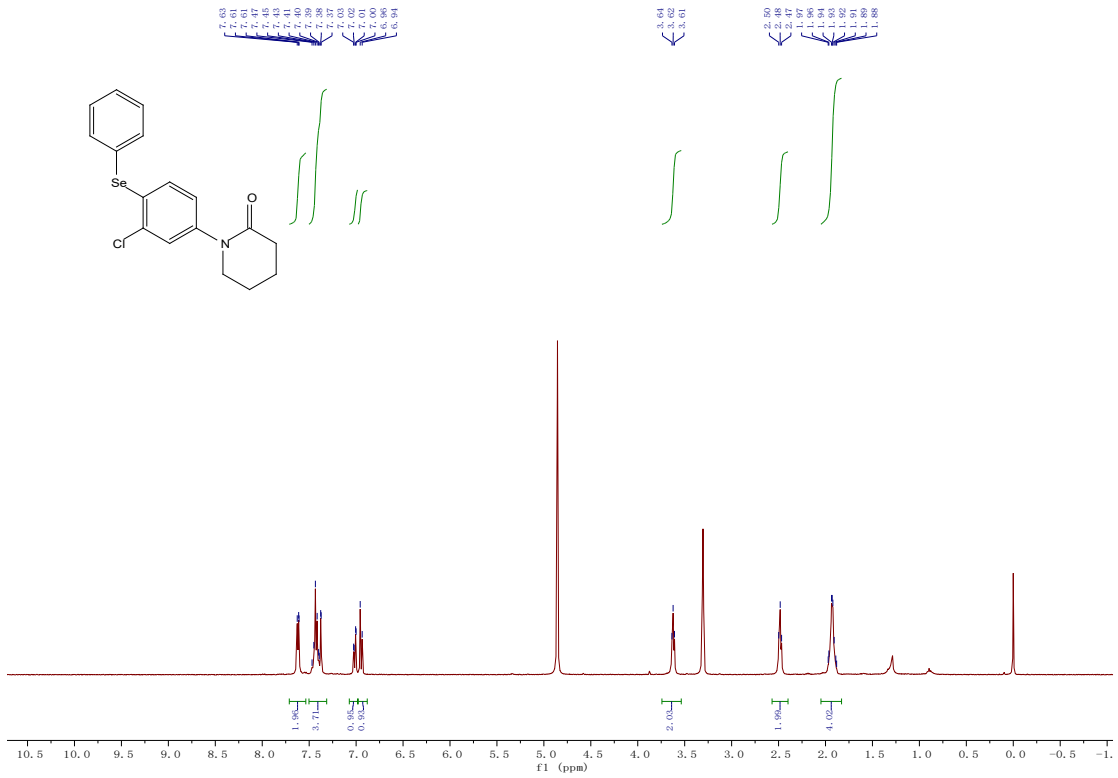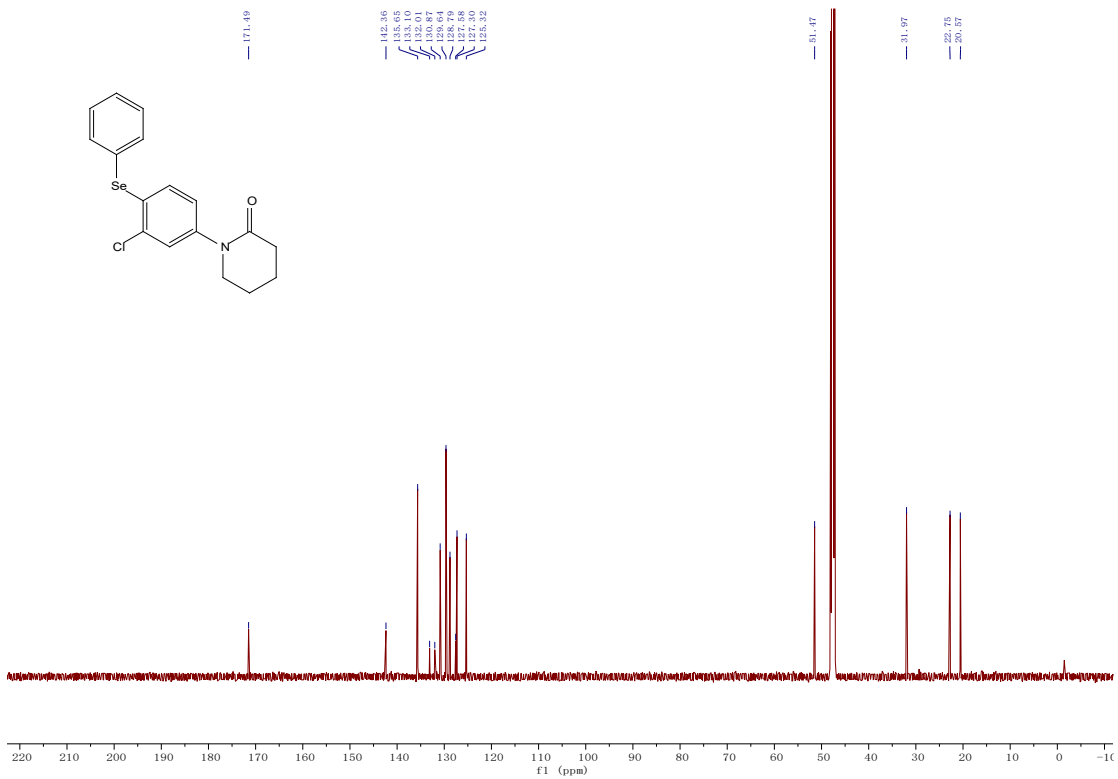

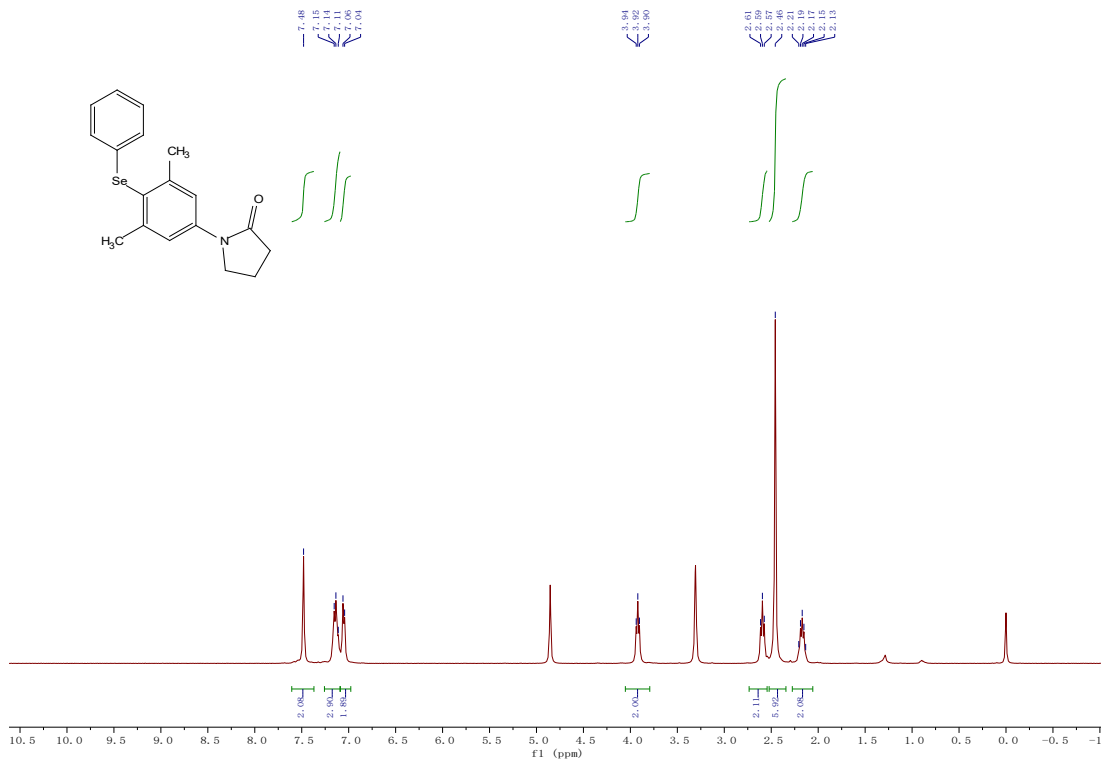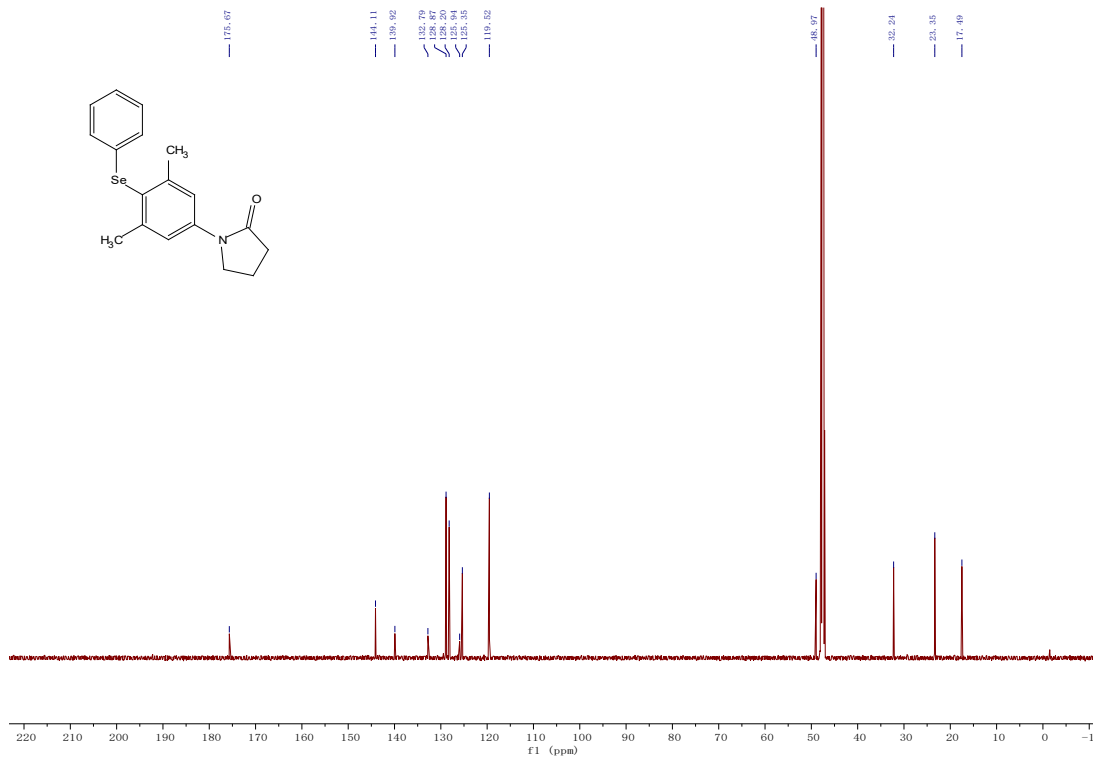





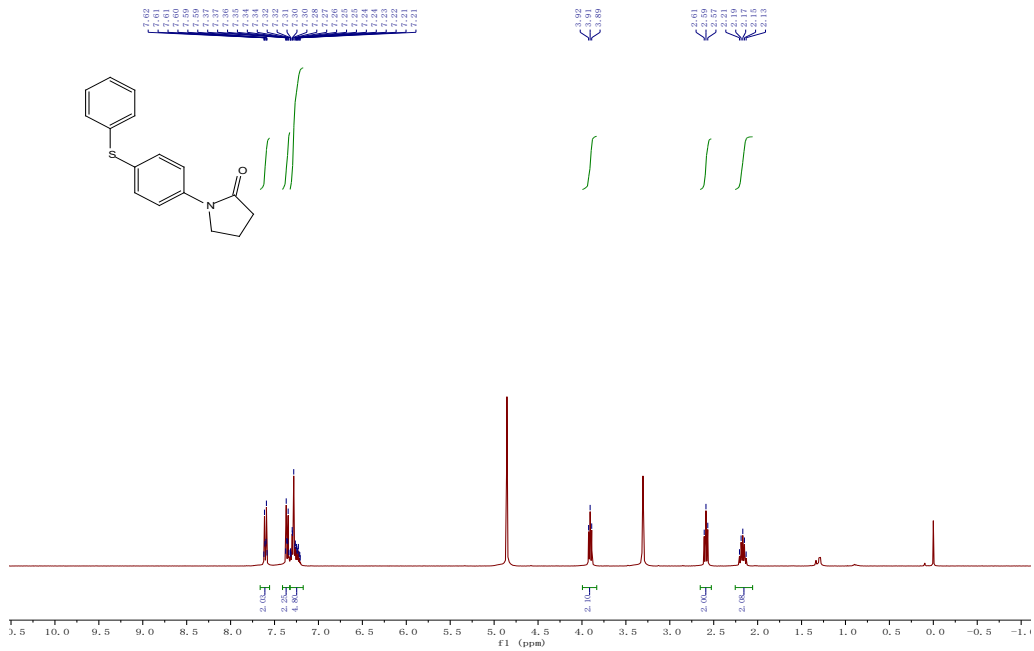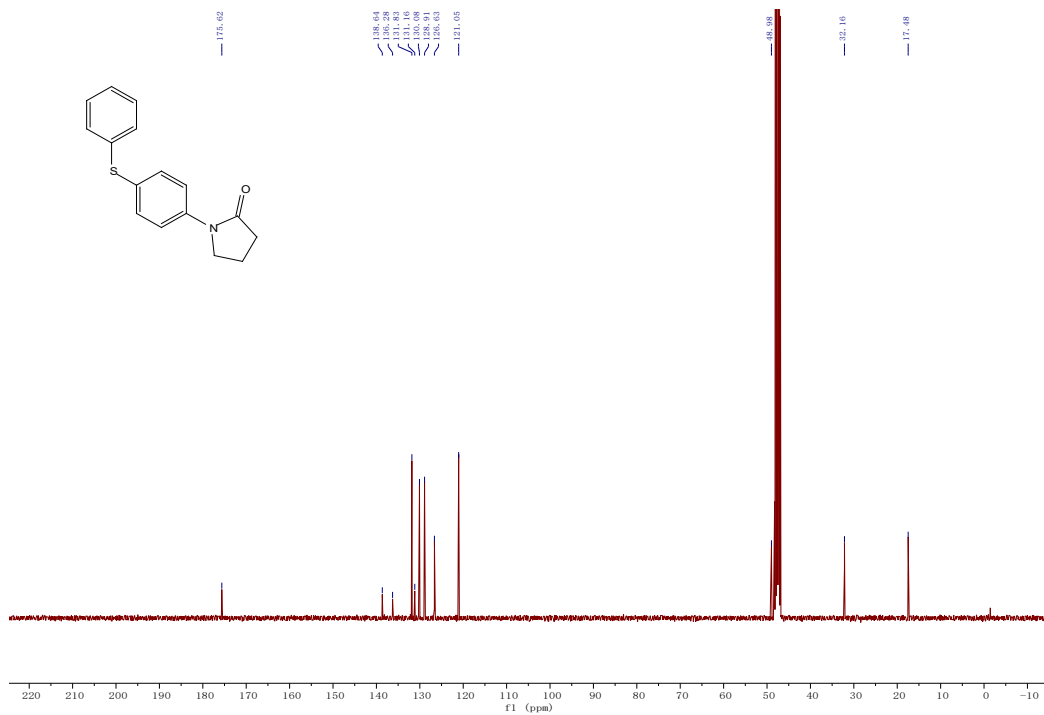

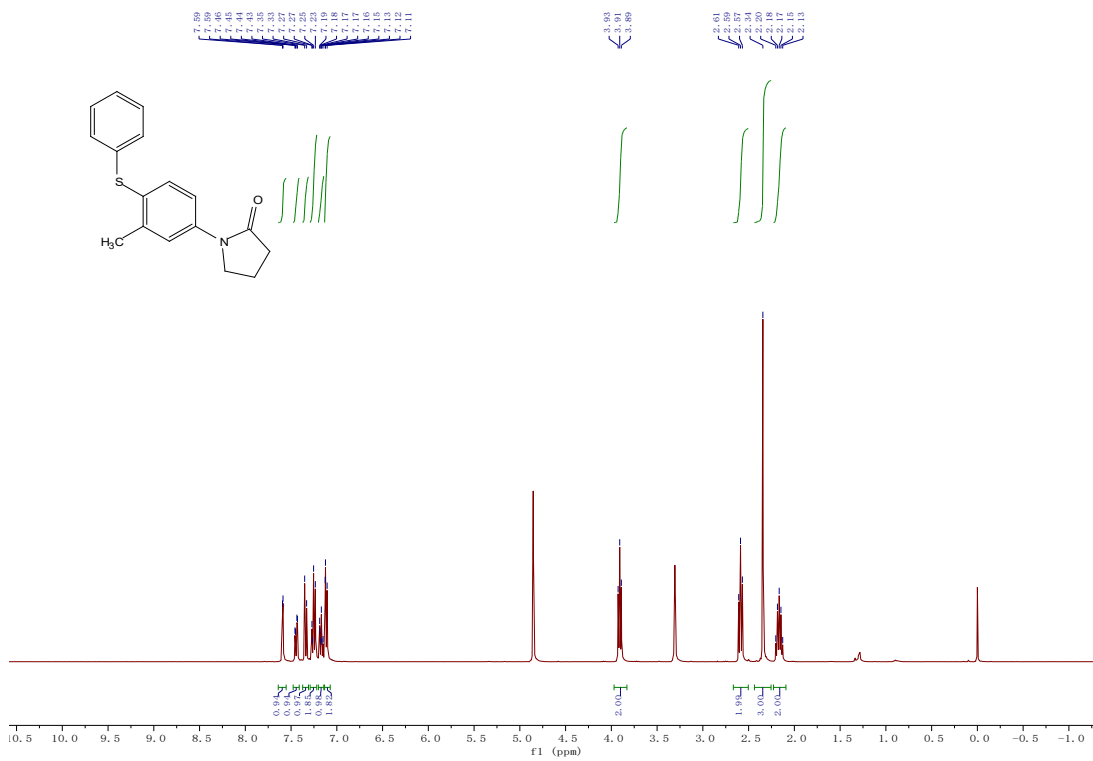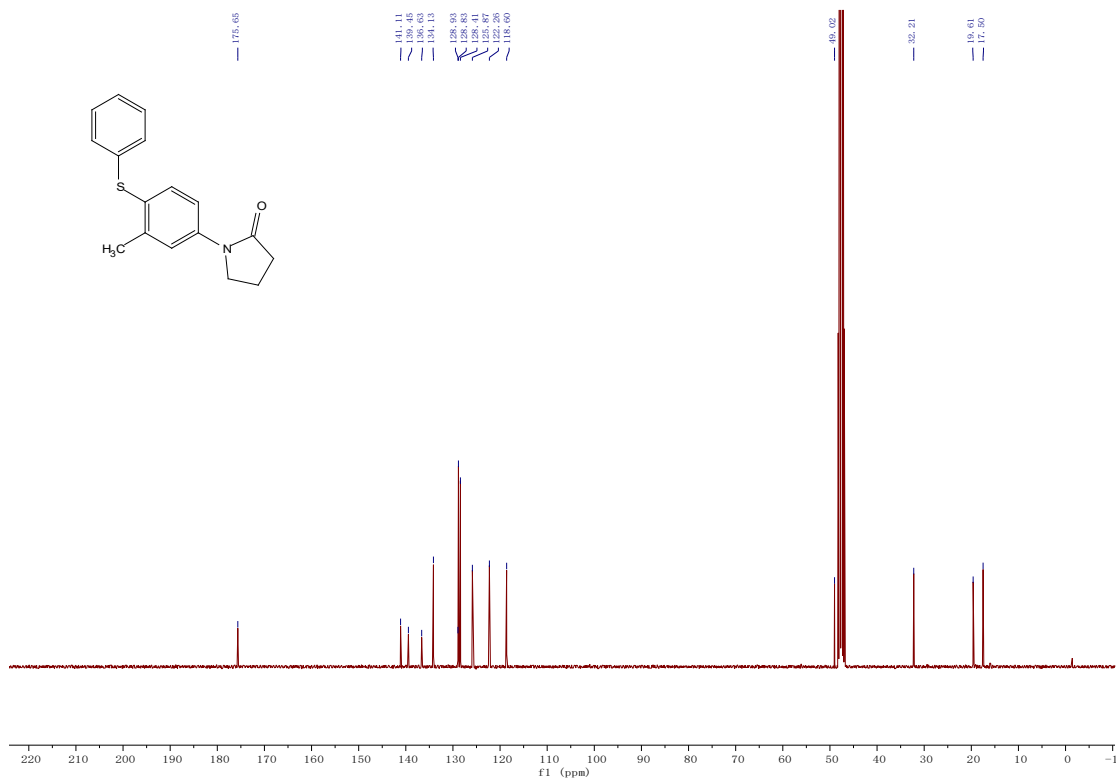

### 9.3 NMR spectra of compound 5

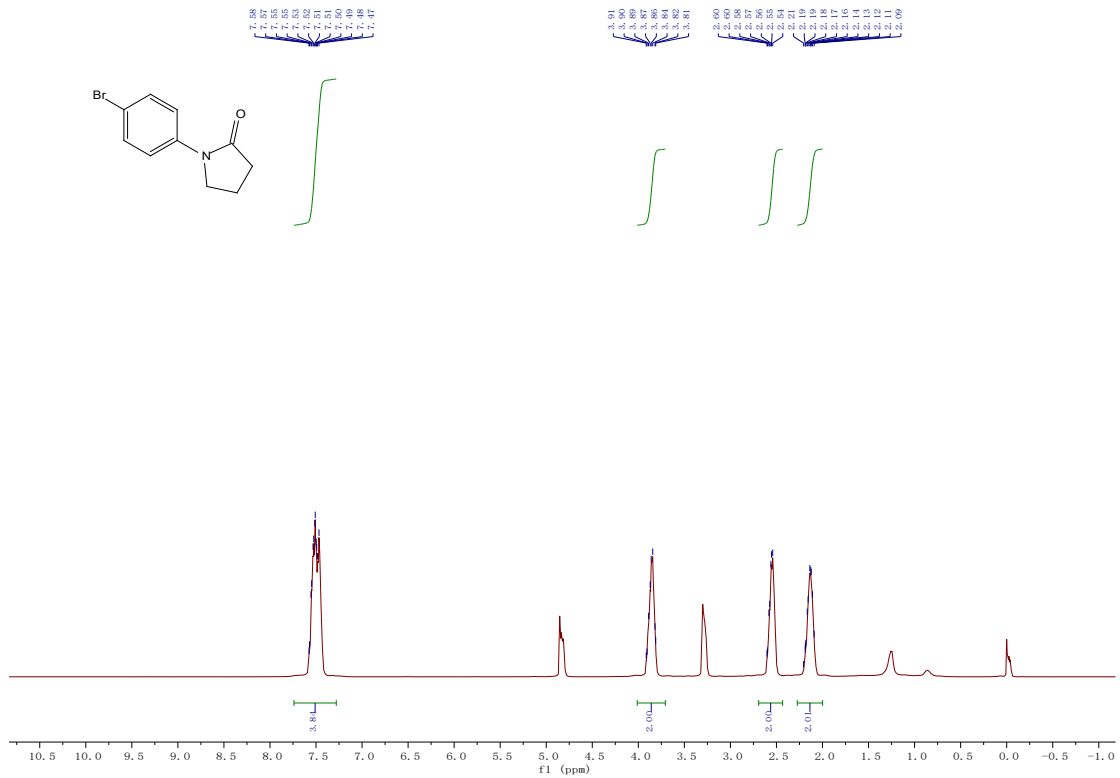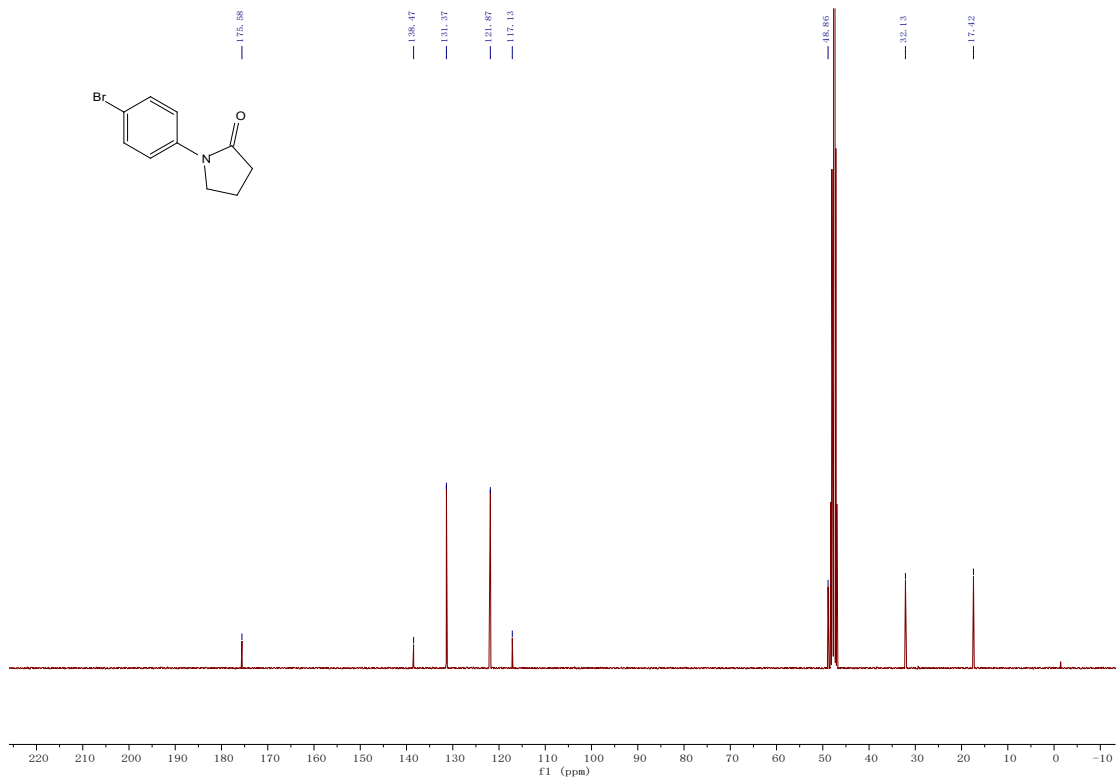

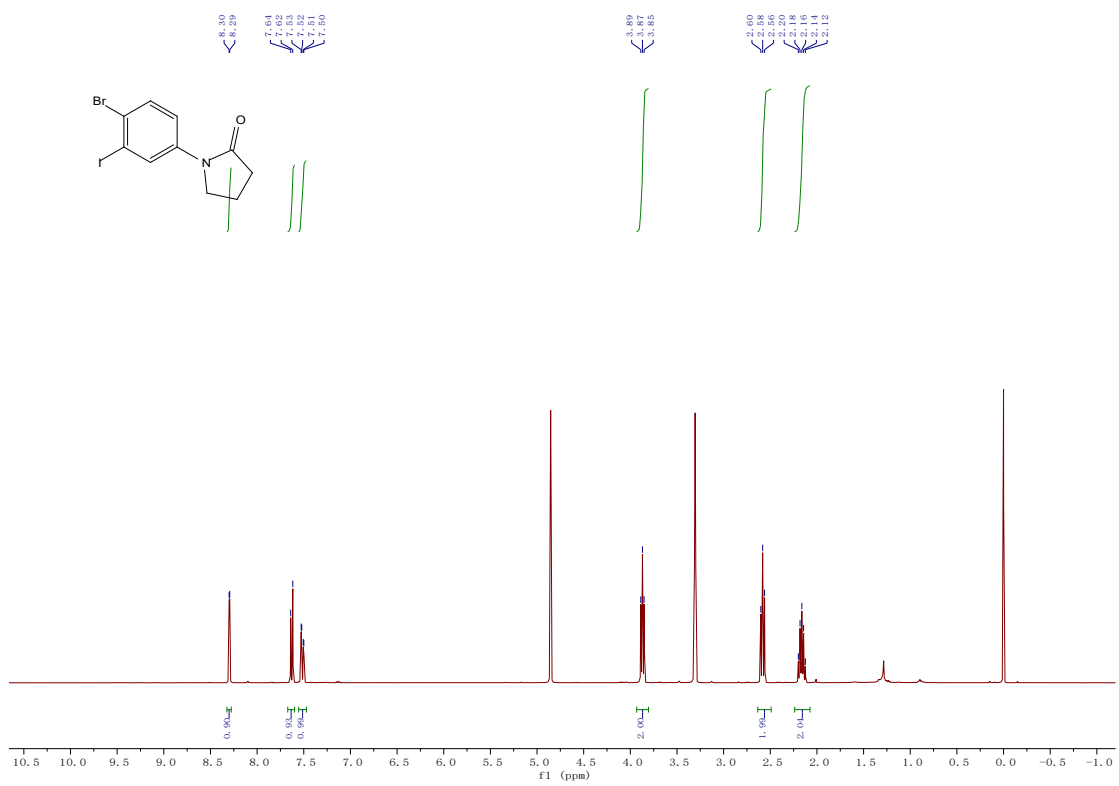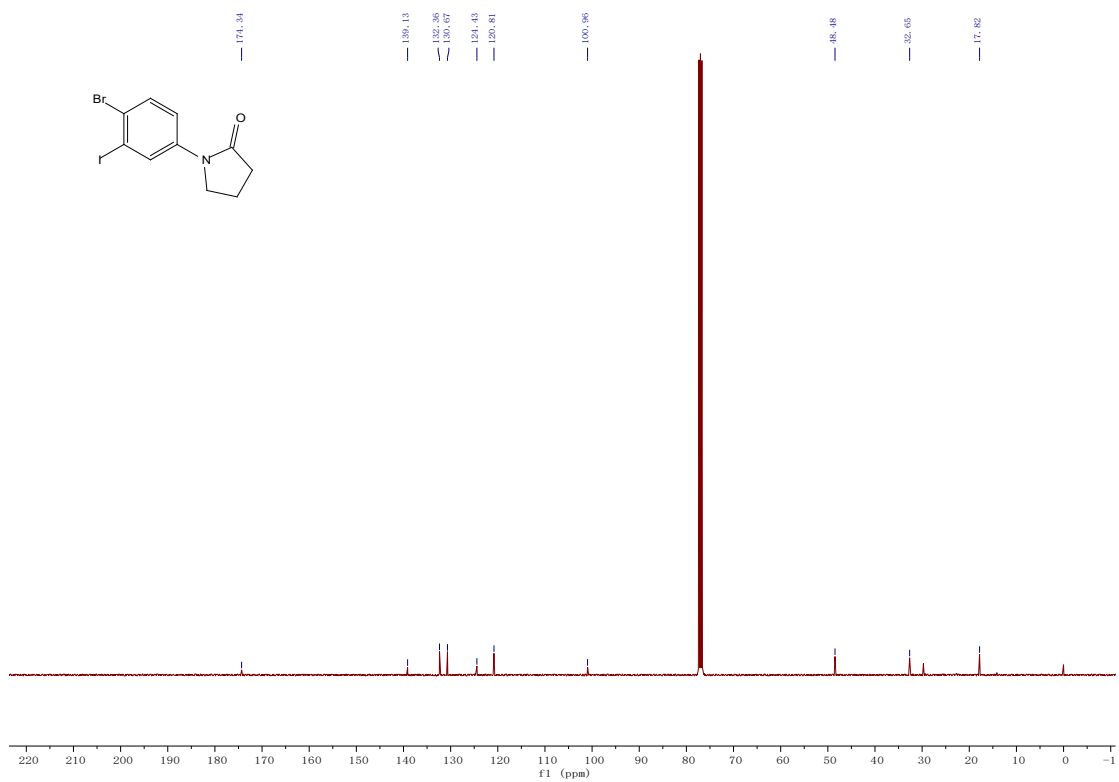

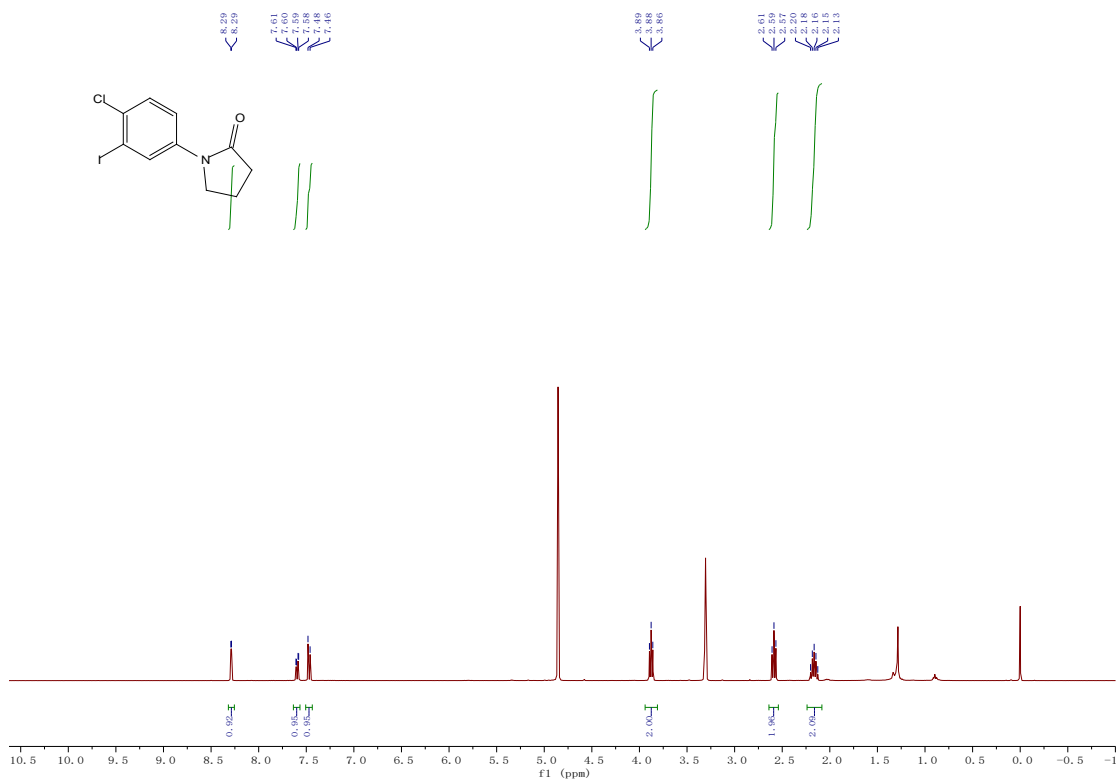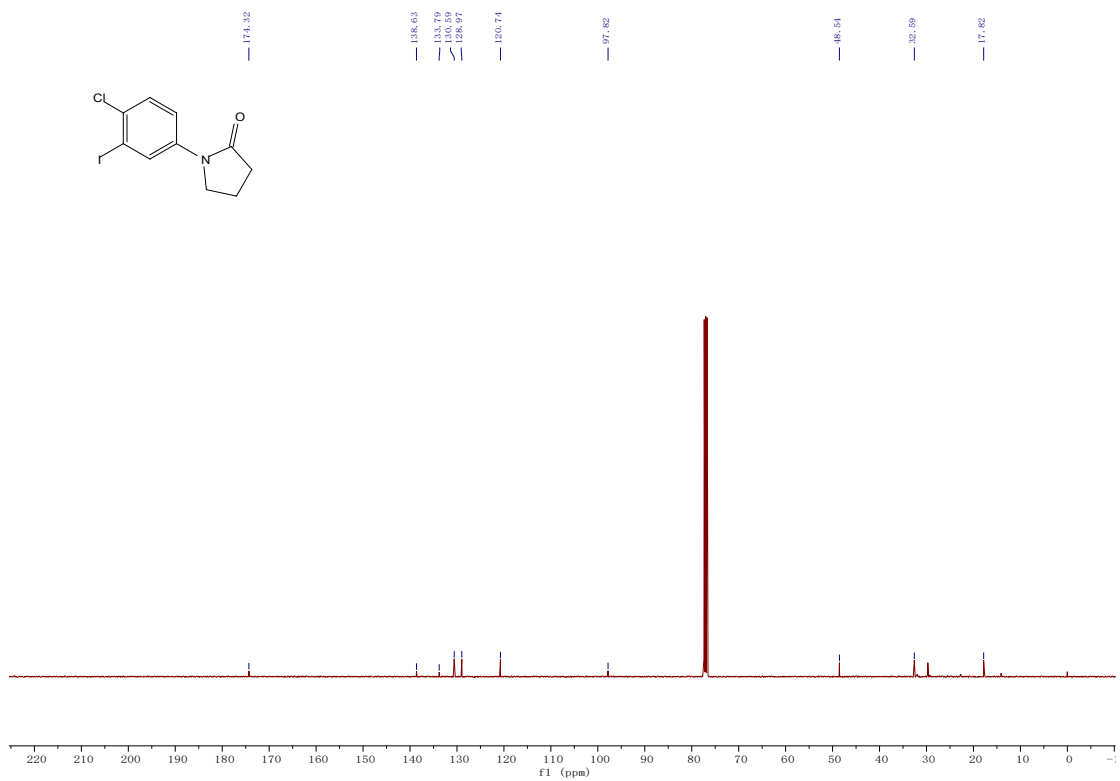

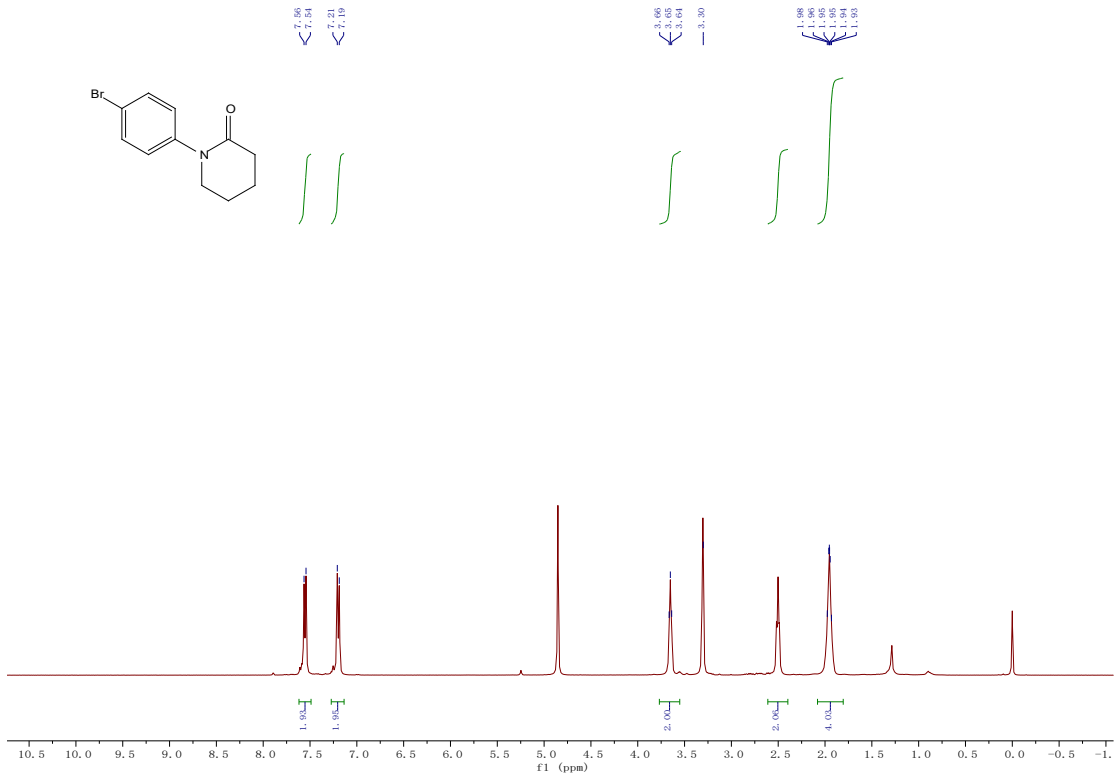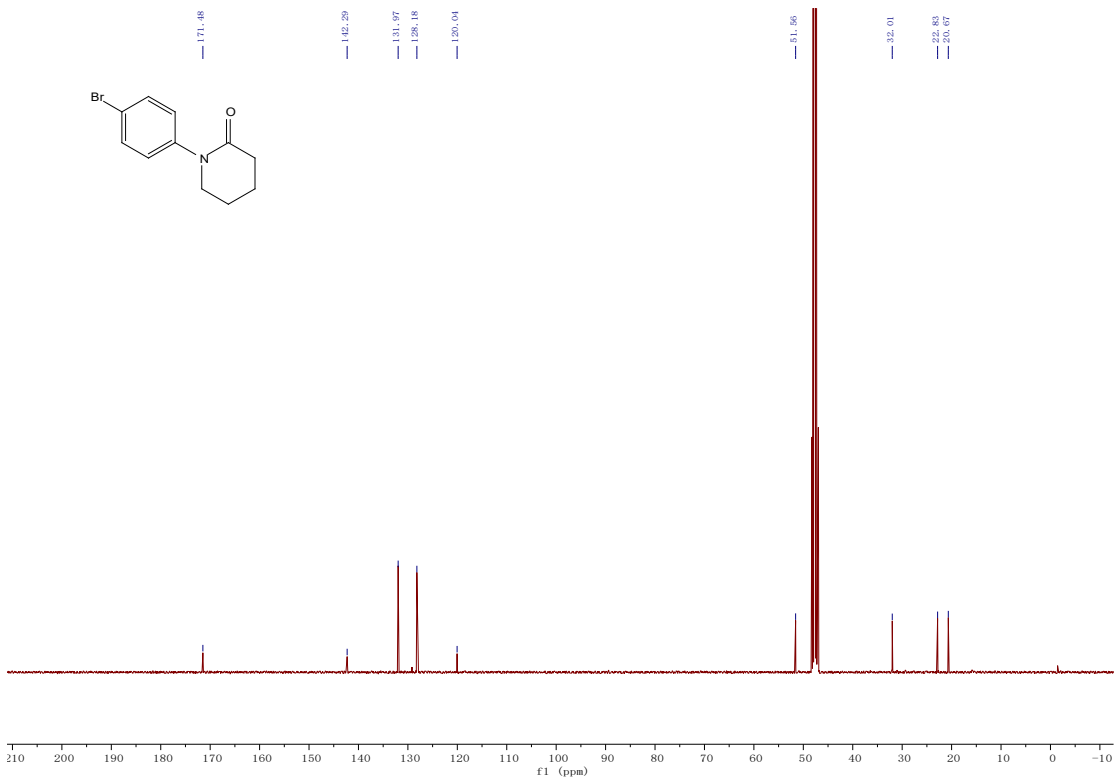

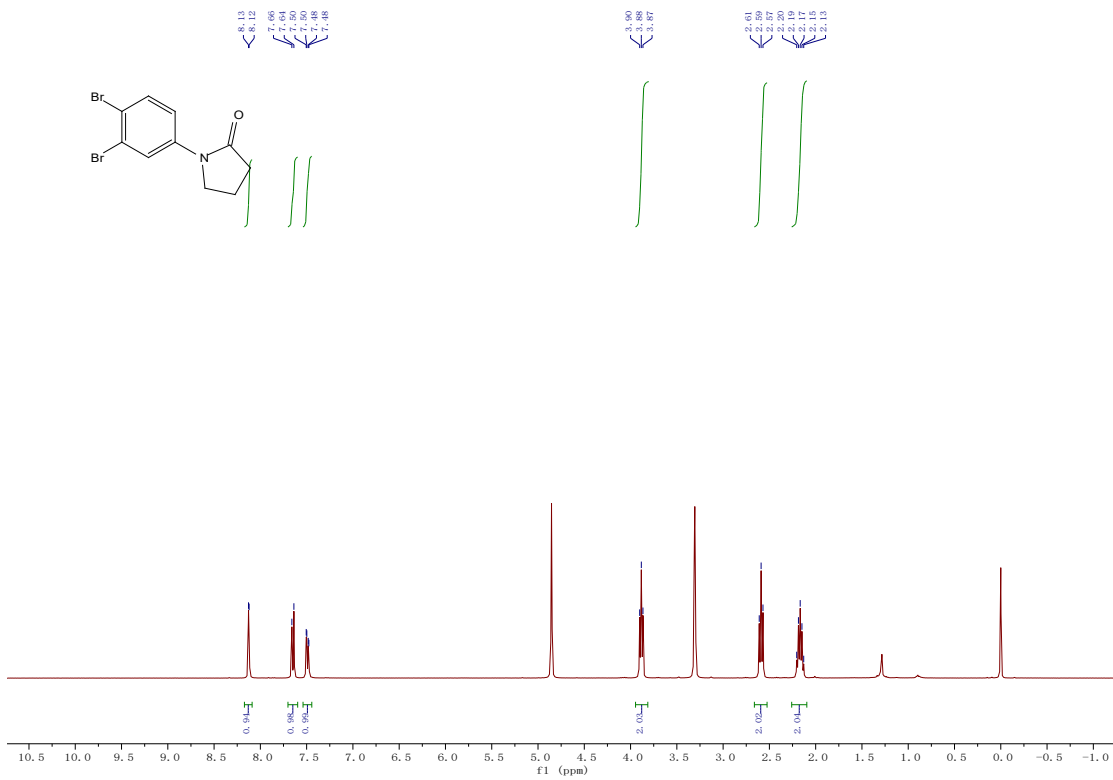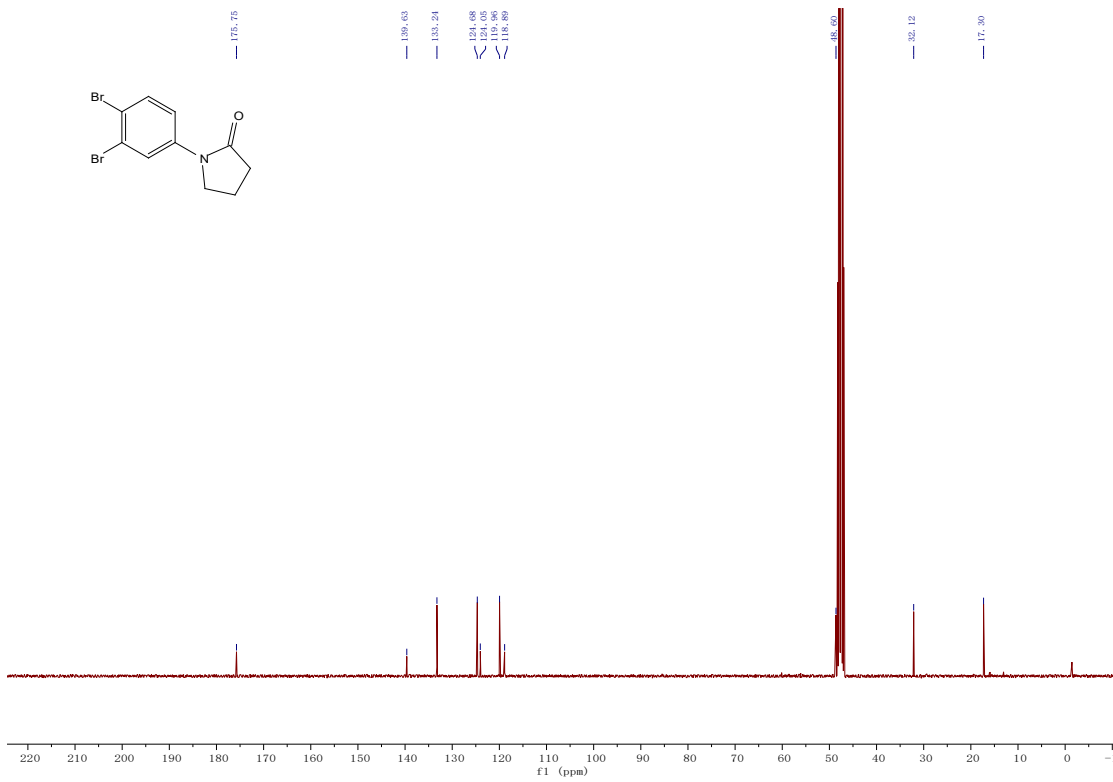



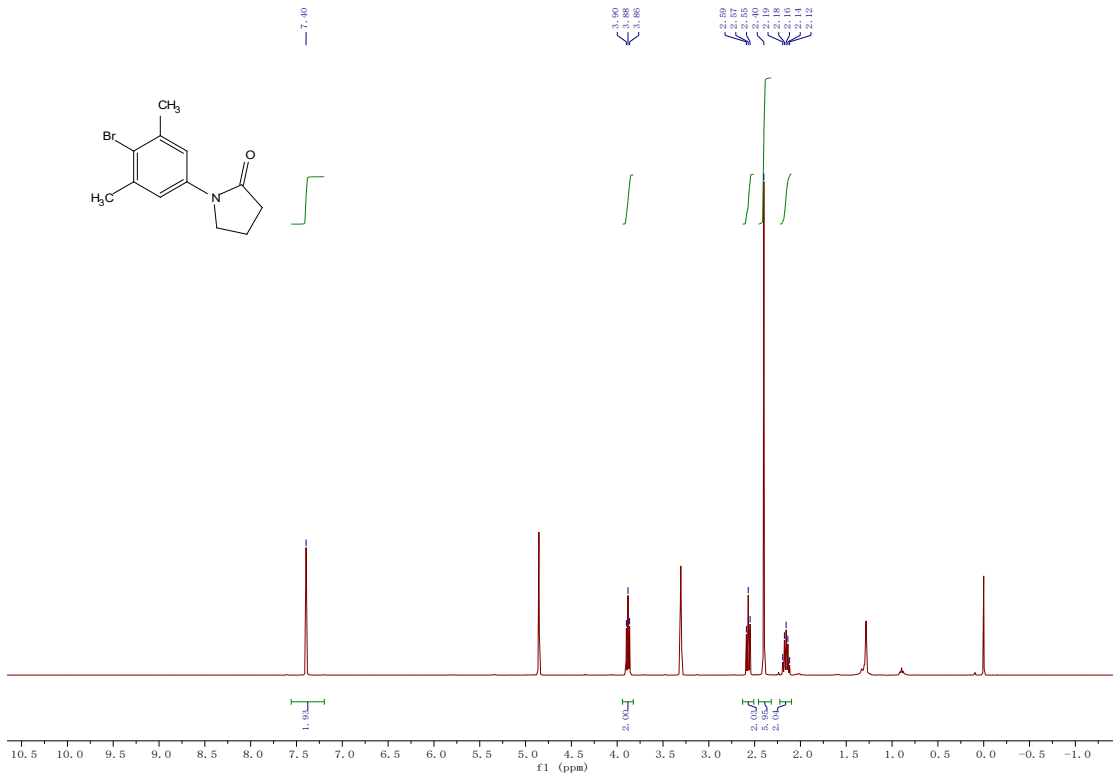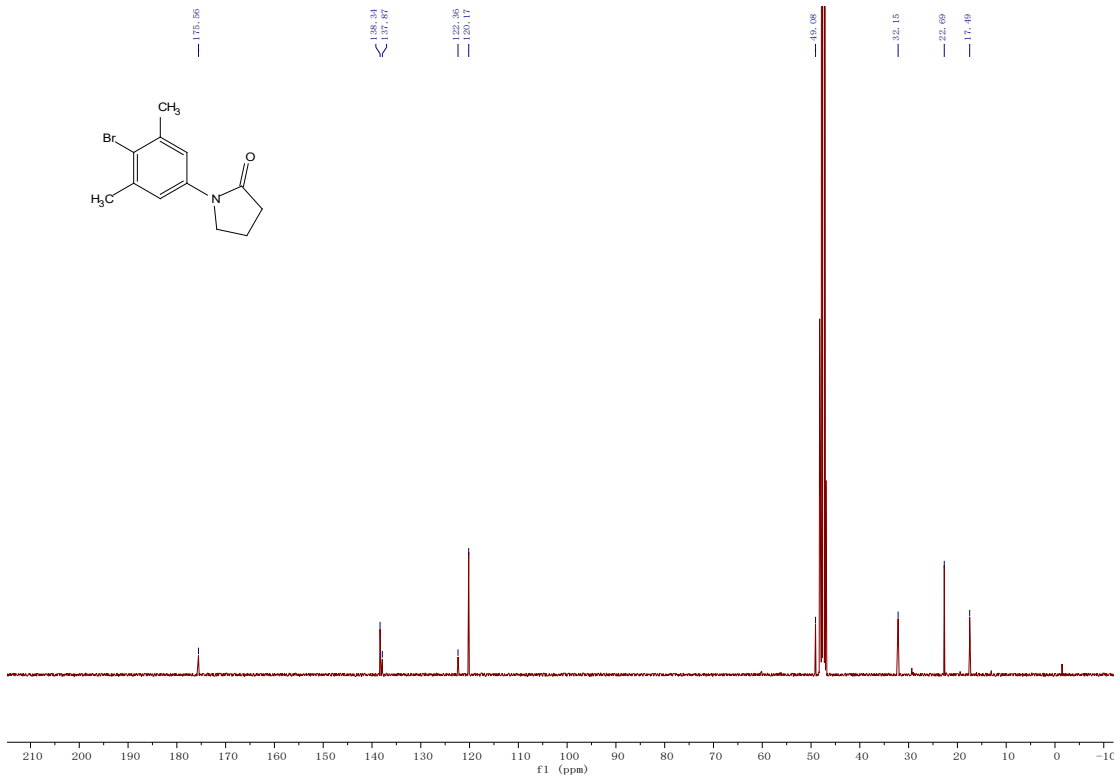

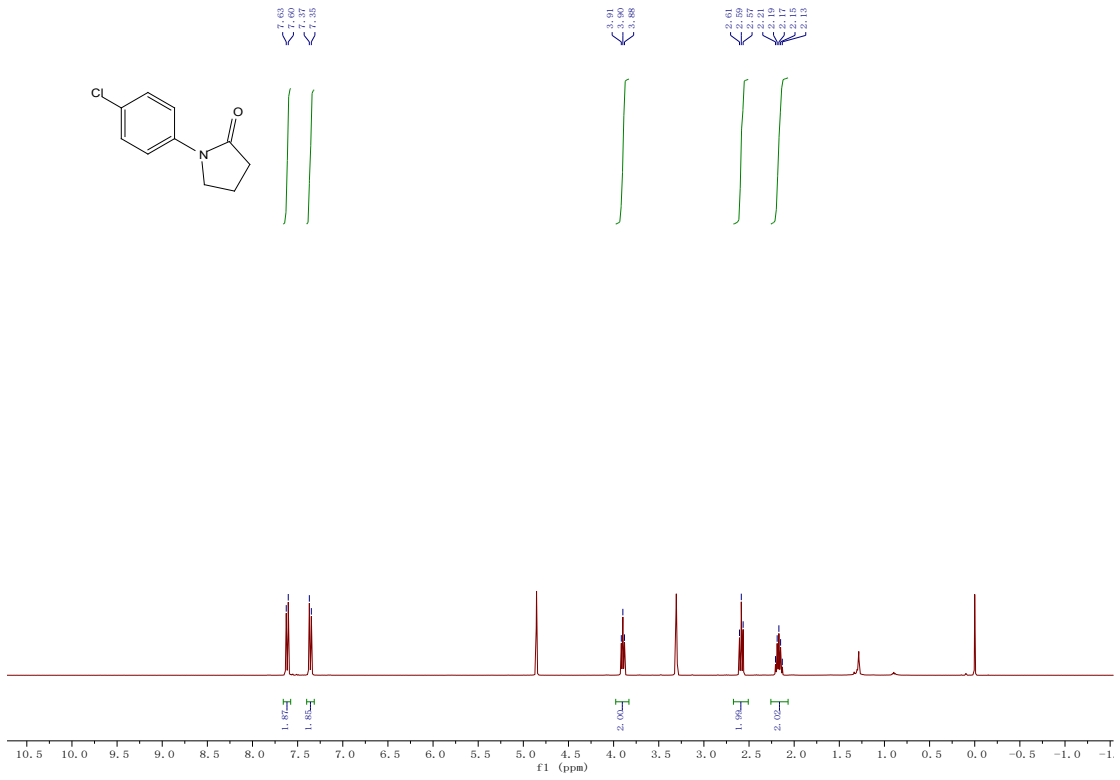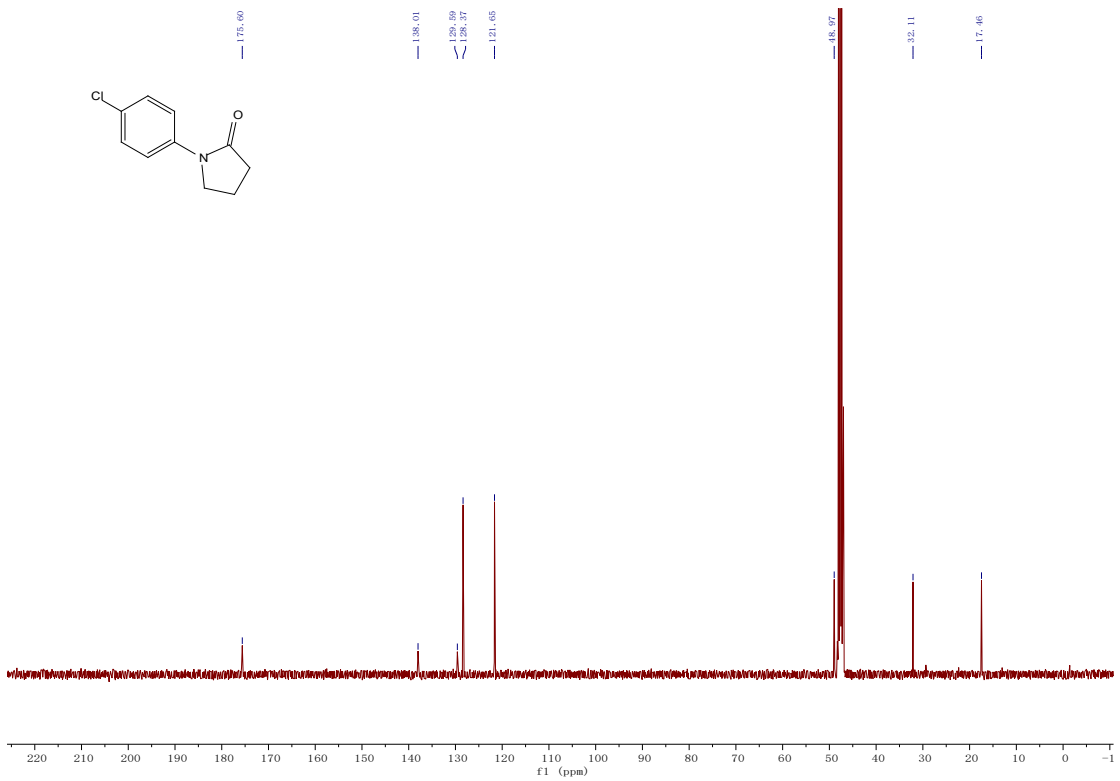

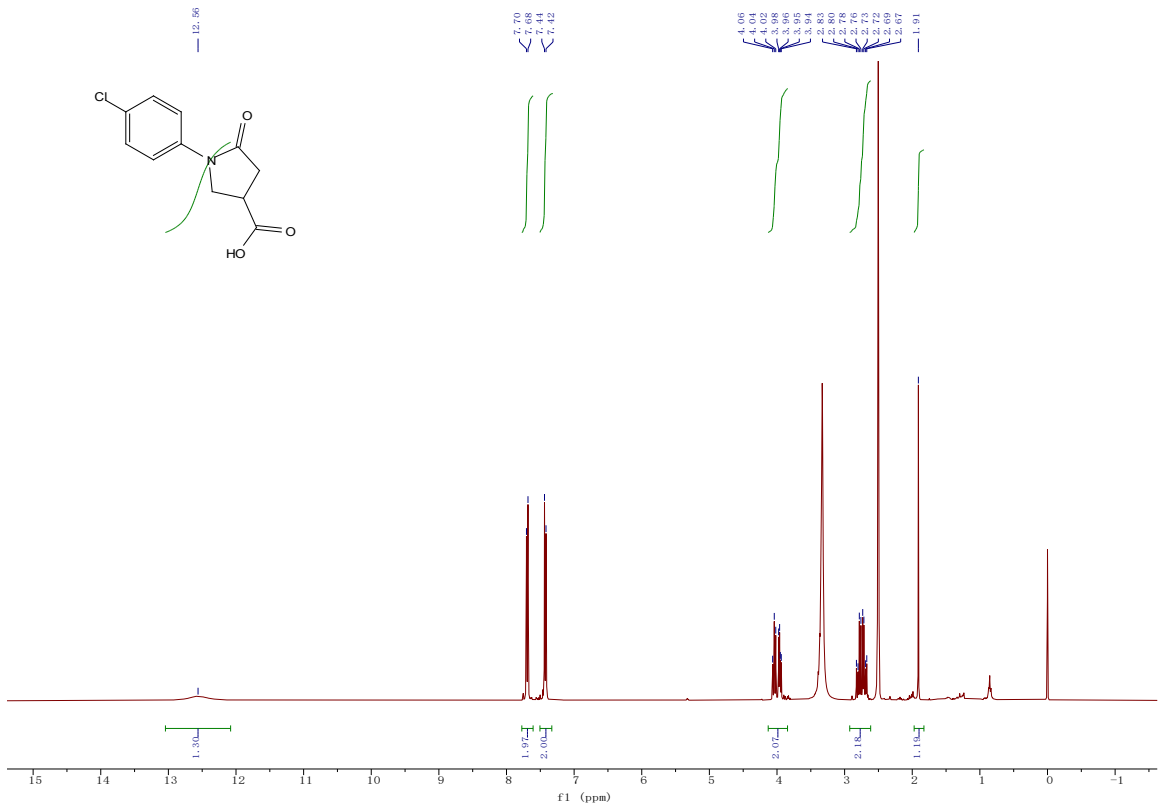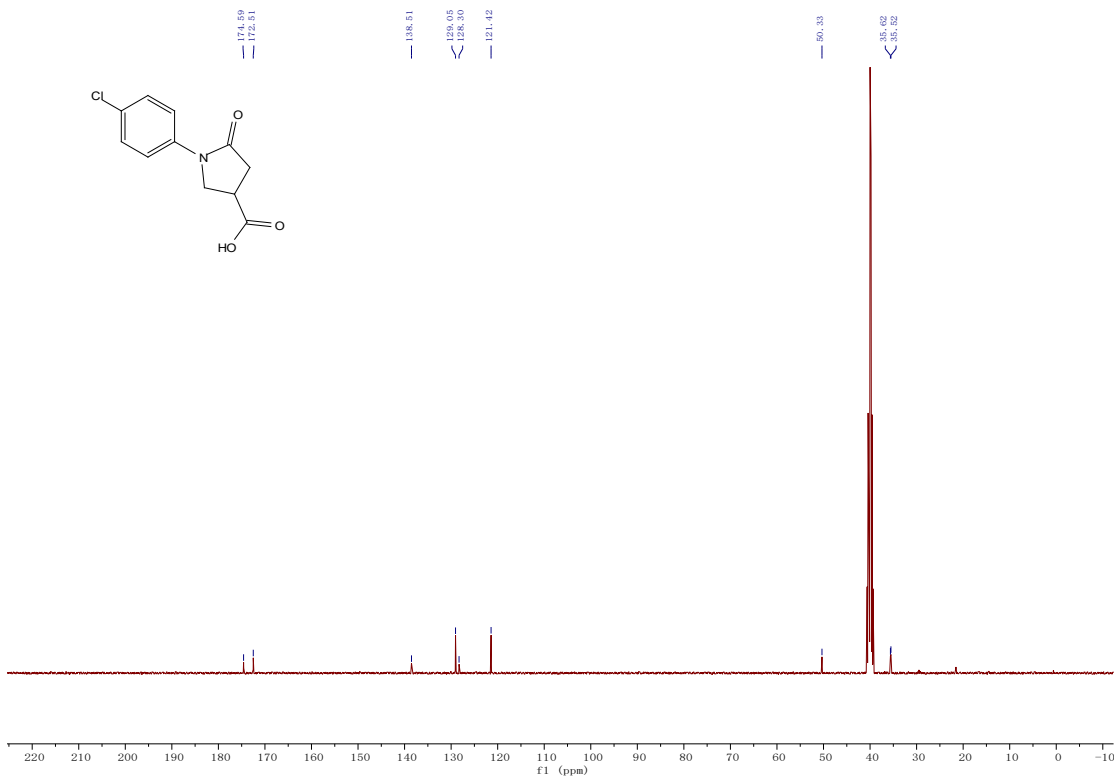

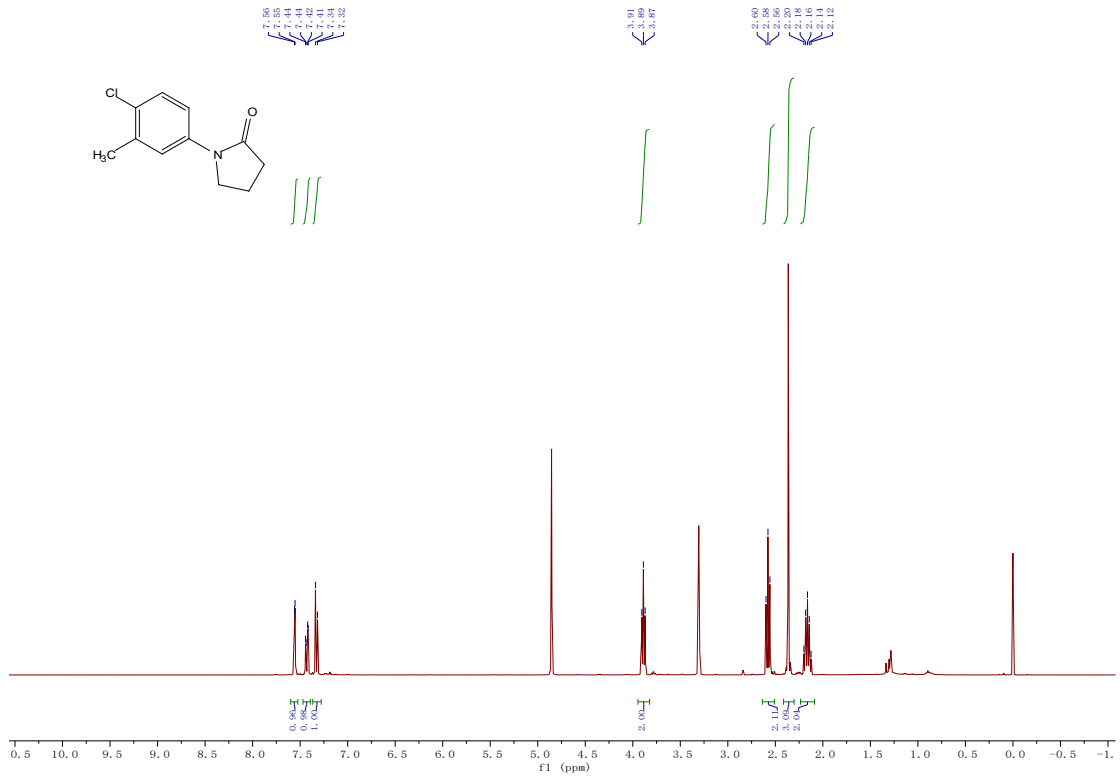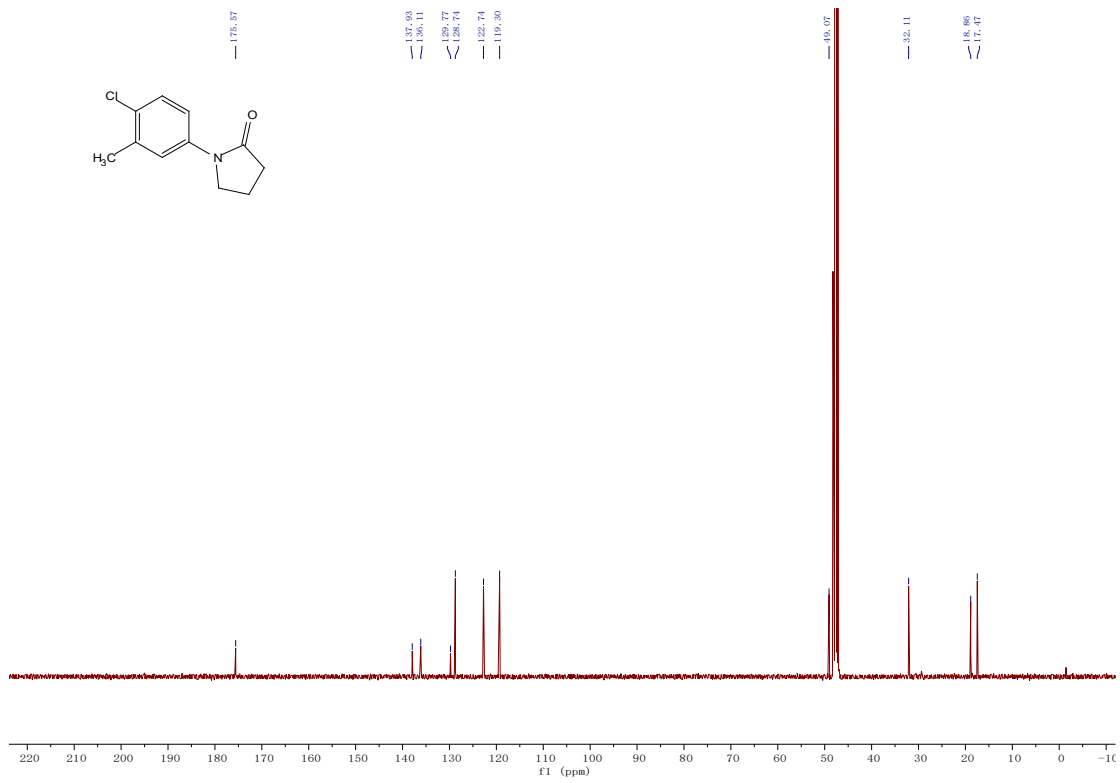

## 10. References

- (1) Zheng, Y.; Nie, X.; Long, Y.; Ji, L.; Fu, H.; Zheng, X.; Chen, H.; Li, R. Ruthenium-Catalyzed Synthesis of: N -Substituted Lactams by Acceptorless Dehydrogenative Coupling of Diols with Primary Amines. *Chem. Commun.* **2019**, 55 (82), 12384–12387. <https://doi.org/10.1039/c9cc06339k>.
- (2) Wang, F.; Zhang, X.; He, Y.; Fan, X. Selective Synthesis of Pyrrolidin-2-Ones and 3-Iodopyrroles: Via the Ring Contraction and Deformylative Functionalization of Piperidine Derivatives. *Org. Biomol. Chem.* **2019**, 17 (1), 156–164. <https://doi.org/10.1039/c8ob02640h>.
- (3) Luo, Y.; Hu, M.; Ge, J.; Li, B.; He, L. Rh-Catalyzed Oxidation and Trifluoroethoxylation of N-Aryl-Pyrrolidin-2-Ones: A Domino Approach for the Synthesis of N-Aryl-5-(2,2,2-Trifluoroethoxy)-1,5-Dihydro-2H-Pyrrol-2-Ones. *Org. Chem. Front.* **2022**, 9 (6), 1593–1598. <https://doi.org/10.1039/d1qo01319j>.
- (4) Loehn, Matthias; Mendez-Perez, Maria; Pfeiffer-Marek, Stefania; Kannt, Aimo; Begis, Guillaume; Jeannot, Frederic; Duclos, O. Preparation of 6-(4-Hydroxy-Phenyl)-3-Styryl-1H-Pyrazolo [3,4-b]Pyridine-4-Carboxylic Acid Amide Derivatives as Kinase Inhibitors for Treatment of Diabetes, Diabetic Complications, and Other Diseases. US20130065894A1[P]. 2013.
- (5) Prince, R. J.; Gao, F.; Pazienna, J. E.; Marx, I. E.; Schulz, J.; Hopkins, B. T. Utilization of Cyclic Amides as Masked Aldehyde Equivalents in Reductive Amination Reactions. *J. Org. Chem.* **2019**, 84 (12), 7936–7949. <https://doi.org/10.1021/acs.joc.9b00816>.
